# Supplementary material
Source: PubMed Central journal article supplement (PMC5760267)

## Supporting information

**Materials:** Proteasome substrates: Suc-LLVY-AMC, Z-LLE-AMC, Z-VLR-AMC and Ac-ANW-AMC were from Boston Biochem (Cambridge, MA). Human immunoproteasome (isolated from PBMCs) and human constitutive proteasome (isolated from RBCs) were from Boston Biochem Inc. Proteasome-Glo™ Chymotrypsin-Like Cell-Based Assay kit and CellTiter-Glo® Luminescent Cell Viability Assay kits were from Promega (Madison, WI). Human whole blood from 3 TT-responsive donors. Tetanus Toxoid (TT; 0.5mg/ml; LIST Biological Labs 191B). Anti-human CD3 (1.65mg/ml; OKT3; in-house, CR 26Jun2012). Separation Media (SM) is RPMI 1640 (LTI 11875-085) with 2.5mM EDTA (Gibco 15575-038). Lympholyte®-H Lymphocyte Separation Medium (Cedarlane Laboratories CL5020). Complete Media (CM) is RPMI 1640 (LTI 11875-085) with 10% FCS (Gibco 26140), 1% L-glutamine (Gibco 25030-081), 50µg/ml gentamicin (Gibco 15750-060), 96-well round bottom plates (Falcon 3077). Unifilter GF/C plates (Packard 5007185). <sup>3</sup>H-thymidine (PerkinElmer Net-027005MC).

### IC<sub>50</sub> determination

IC<sub>50</sub> values against β5i and β5c for compounds were carried out in a 96-well format as reported with slight modification.<sup>[1]</sup> In brief, 1 µL of compound in a 3x series dilution in DMSO at concentration ranging from 100 µM – 0.0017 µM were spotted to the bottom of a black 96-well plate with solid bottom. 100 µL of reaction buffer (20 mM HEPES, 0.5 mM EDTA, pH7.5) containing enzyme (final concentration is 0.2 nM for c-20S, and 0.4 nM for i-20S) and substrate were dispensed into each well, and the plate was then spun at 1000x rpm for 1 minute and followed by shaking on a shaker for 1 minute. Time course of the hydrolysis of each well was followed by recording the fluorescence of product AMC (Ex 360 nm and Em 460 nm) on a SpectraMax M5

plate reader for 1.5 – 2 hours. Initial reaction velocity of each well was fit to a dose-dependent inhibition equation using PRISM to determine the IC<sub>50</sub>. IC<sub>50</sub>s were determined only for  $\beta$ 5i and  $\beta$ 5c. IC<sub>50</sub>s of compounds < 10  $\mu$ M were determined three times or more, and IC<sub>50</sub>s of compounds > 10  $\mu$ M were determined two times or more. When IC<sub>50</sub> is > 100  $\mu$ M, it is used as 100  $\mu$ M for the calculation of mean.

Final concentration of activator is 6 nM for PA28 $\alpha$  or 0.02% for SDS. Final concentrations of substrates are 15  $\mu$ M for Ac-WLA-AMC, 12.5  $\mu$ M for Ac-ANW-AMC, 25  $\mu$ M for suc-LVY-AMC, 50  $\mu$ M for Z-VLR-AMC and 50  $\mu$ M for Z-LLE-AMC. 0.01% BSA was used in the reaction buffer.

Inhibitory activities of  $\beta$ -AA dipeptidomimetics against  $\beta$ 1i,  $\beta$ 1c,  $\beta$ 2i and  $\beta$ 2c were tested at 3 concentrations: 100  $\mu$ M, 33.3  $\mu$ M and 11.1  $\mu$ M. All compounds showed < 50% inhibition at 33.3  $\mu$ M. Hence, the IC<sub>50</sub>s were presented as > 33.3  $\mu$ M (Table S1).

Table S1. IC<sub>50</sub>s of dipeptidomimetics against  $\beta$ 1i,  $\beta$ 2i,  $\beta$ 1c and  $\beta$ 2c of human immuno- and constitutive proteasomes

| ID              | IC <sub>50</sub> ( $\mu$ M) |                         |                         |                         |
|-----------------|-----------------------------|-------------------------|-------------------------|-------------------------|
|                 | $\beta$ 1i<br>Ac-PAL-AMC    | $\beta$ 1c<br>Z-LLE-AMC | $\beta$ 2i<br>Z-VLR-AMC | $\beta$ 2c<br>Z-VLR-AMC |
| P1: $\beta$ -AA |                             |                         |                         |                         |
| PKS2249         | > 33.3                      | > 33.3                  | > 33.3                  | > 33.3                  |
| PKS2251         | > 33.3                      | > 33.3                  | > 33.3                  | > 33.3                  |
| PKS2252         | > 33.3                      | > 33.3                  | > 33.3                  | > 33.3                  |
| PKS2260         | > 33.3                      | > 33.3                  | > 33.3                  | > 33.3                  |
| PKS2272         | > 33.3                      | > 33.3                  | > 33.3                  | > 33.3                  |
| PKS2295         | > 33.3                      | > 33.3                  | > 33.3                  | > 33.3                  |
| PKS3054         | > 33.3                      | > 33.3                  | > 33.3                  | > 33.3                  |
| P2: $\beta$ -AA |                             |                         |                         |                         |

|                      |        |        |        |        |
|----------------------|--------|--------|--------|--------|
| PKS2278              | > 33.3 | > 33.3 | > 33.3 | > 33.3 |
| PKS2279              | > 33.3 | > 33.3 | > 33.3 | > 33.3 |
| P1, P2: $\beta$ -AAs |        |        |        |        |
| PKS2291              | > 33.3 | > 33.3 | > 33.3 | > 33.3 |
| PKS2292              | > 33.3 | > 33.3 | > 33.3 | > 33.3 |

### Cytotoxicity of PKS3054

Human peripheral blood mononuclear cells were purified following a reported protocol.<sup>[2]</sup> PKS3054 and bortezomib (positive control) at designated concentrations in DMSO were spot in wells of a 96-well black plate with clear bottom. 50  $\mu$ L of plasma were added to each wells, and 50  $\mu$ L of PBMCs  $2 \times 10^6$  cells / mL in plasma were then added to each well. DMSO was constant at 1% in each well. The cells were incubated at 37°C 5% CO<sub>2</sub> for 5 days. Cell viability was determined with CellTiter-Glo<sup>®</sup> Luminescent Cell Viability Assay (Promega).

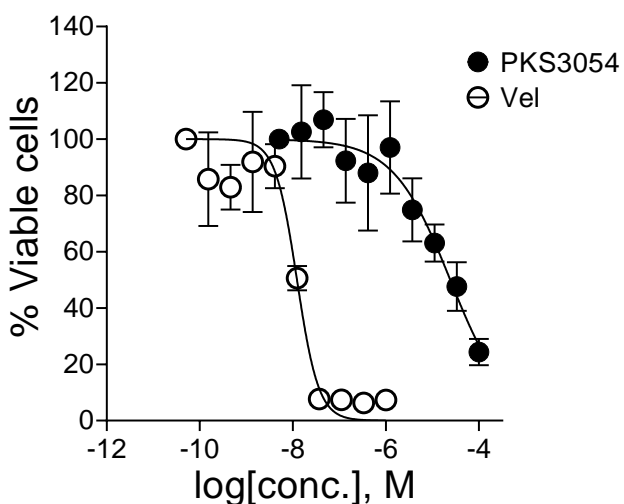

Figure S1. Cytotoxicity of PKS3054 against peripheral blood mononuclear cells. Velcade was used as positive control. Data is a representative of three independent experiments. Cell viability were determined by a CellTiter-Glo<sup>®</sup> after 5 days.

## **Human PBMC Proliferation Assay**

Informed consents were obtained from blood donors after the nature and possible consequences of the studies were explained.

**PBMC Isolation-** EDTA-treated blood from donors was separated by Ficoll as follows: The syringes of blood were inverted to mix and divided equally among 50ml tubes (~20ml/tube) containing 20ml SM. 10ml of Ficoll was under laid in each tube. Tubes were spun at 1800 rpm for 20 min (low brake). The interfaces from each two tubes were combined into one 50ml tube, brought up to 45ml with SM and spun at 1700 rpm for 8 min. Supernatant was aspirated; and cells were resuspended in 45ml SM and spun at 1100 rpm (to remove platelets) for 8 min. Cells were then resuspended in CM at  $1 \times 10^6$  cells/mL.

### **Methods:**

PKS3054 was diluted to 10x ( $3\mu\text{M}$  final top concentration)  $3\mu\text{l} + 7\mu\text{l}$  DMSO then  $6\mu\text{l} + 594\mu\text{l}$  CM, and then serially diluted 1:3.3333 ( $135\mu\text{l} + 315\mu\text{l}$  1% DMSO/CM).  $10\mu\text{l}$  of each appropriate dilution was added to the appropriate wells (see plate maps). The PBMC cells in CM at  $1 \times 10^6/\text{mL}$ .  $100\mu\text{l}/\text{well}$  (100,000 cells/well) was then added to the appropriate wells of the plates and were incubated for 1hr at  $37^\circ\text{C}$ , 5%  $\text{CO}_2$  prior to adding the stimuli: TT was diluted 1:25 to 4x ( $720\mu\text{l} + 17.3\text{ml}$  0.1% DMSO/CM =  $5\mu\text{g}/\text{ml}$  final), and  $50\mu\text{l}/\text{well}$  was then added to the appropriate wells of the plates; or Anti-human CD3 (OKT3) was diluted  $1\mu\text{g}/\text{ml}$  and  $50\mu\text{l}/\text{well}$  was then added to the appropriate wells of the plates ( $0.5\mu\text{g}/\text{mL}$  final). All wells were brought up to  $200\mu\text{l}$  with 0.1% DMSO/CM. The plates were incubated at  $37^\circ\text{C}$ , 5%  $\text{CO}_2$  for 5 days. On the fifth day,  $100\mu\text{l}$  supernatant was removed from each well, and  $0.5\mu\text{Ci}$  of  $^3\text{H}$ -Thymidine in  $100\mu\text{l}$  CM was added to each well of the PBMC assay plates, and incubated for 6 hours. The assay plates were harvested on a Packard Filtermate Harvester according to the manufacturer's instruction. The plates were

dried overnight at room temperature or for 1hr in a 37°C vacuum oven and then 50µl/well PerkinElmer Microscint-20 scintillant was added. The plates were then counted on a Packard TopCount scintillation counter.

Plate map for assay of Tetanus Toxoid-specific human PBMC Proliferation

|                 |  |  |  |  |  |  |  |  |  |  |  |  |
|-----------------|--|--|--|--|--|--|--|--|--|--|--|--|
| <b>33.33333</b> |  |  |  |  |  |  |  |  |  |  |  |  |
| <b>11.11111</b> |  |  |  |  |  |  |  |  |  |  |  |  |
| <b>3.703704</b> |  |  |  |  |  |  |  |  |  |  |  |  |
| <b>1.234568</b> |  |  |  |  |  |  |  |  |  |  |  |  |
| <b>0.411523</b> |  |  |  |  |  |  |  |  |  |  |  |  |
| <b>0.137174</b> |  |  |  |  |  |  |  |  |  |  |  |  |
| <b>0.045725</b> |  |  |  |  |  |  |  |  |  |  |  |  |
| <b>0.015242</b> |  |  |  |  |  |  |  |  |  |  |  |  |
| <b>0.005081</b> |  |  |  |  |  |  |  |  |  |  |  |  |

Plate map for assay of anti-human CD3 antibody stimulated human PBMC Proliferation

|          | 1 | 2          | 3         | 4         | 5        | 6        | 7          | 8          | 9          | 10                | 11           | 12 |
|----------|---|------------|-----------|-----------|----------|----------|------------|------------|------------|-------------------|--------------|----|
| <b>A</b> |   |            |           |           |          |          |            |            |            |                   |              |    |
| <b>B</b> |   | 3000<br>nM | 900<br>nM | 270<br>nM | 81<br>nM | 24<br>nM | 7.29<br>nM | 2.19<br>nM | 0.56<br>nM | PBMC<br>+<br>xCD3 | PBMC<br>only |    |
| <b>C</b> |   | "          | "         | "         | "        | "        | "          | "          | "          | "                 | "            |    |
| <b>D</b> |   | "          | "         | "         | "        | "        | "          | "          | "          | "                 | "            |    |
| <b>E</b> |   |            |           |           |          |          |            |            |            |                   |              |    |
| <b>F</b> |   |            |           |           |          |          |            |            |            |                   |              |    |
| <b>G</b> |   |            |           |           |          |          |            |            |            |                   |              |    |
| <b>H</b> |   |            |           |           |          |          |            |            |            |                   |              |    |

### Computational docking study

A homology model of human  $\beta 5i\beta 6$  dimer was constructed with Modeller,<sup>[3]</sup> using the crystal structure of mouse i-20S (PDB: 3UNF) as the template. The docking study of compounds PKS2279 and PKS2252 in the binding site of the human  $\beta 5i\beta 6$  model was carried out with the

core-restrained induce-fit protocol<sup>[4]</sup> in Schrödinger software (release 2016-1; Schrödinger, LLC: New York, NY), using the OPLS3 force-field.<sup>[5]</sup> The top ranked poses were further optimized by iterations of manual adjustments using the crystal structure of the yeast 20S with compound 16 as the template<sup>[6]</sup> and energy minimizations.

## Synthesis and characterization

**Chemicals and Spectroscopy:** Unless otherwise stated, all commercially available materials were purchased from Bachem, Aldrich, P3 BioSystems, or other vendors and were used as received. All non-aqueous reactions were performed under argon in oven-dried glasswares. Routine monitoring of reactions was performed using Waters Acquity Ultra Performance Liquid Chromatography (UPLC). All HPLC purifications were done by Varian PrepStar HPLC system or Waters Autopure (mass directed purification system) using Prep C18 5 $\mu$ m OBD (19 X 150 mm) column. Purity of each final compound was determined on a Waters HPLC equipped with a Waters 2420 ELS (Evaporative Light Scattering) Detector and an XBridge<sup>TM</sup> C18 5 $\mu$ M 4.6x150 mm column. The purity was calculated by integration of peak area in ELSD spectra and listed in Table S2 (see HPLC). <sup>1</sup>H- and <sup>13</sup>C- NMR spectra were acquired on a Bruker DRX-500 spectrometer. Chemical shifts  $\delta$  are expressed in parts per million, with the solvent resonance as an internal standard (chloroform-*d*, <sup>1</sup>H: 7.26; <sup>13</sup>C: 77.16 ppm; DMSO-*d*<sub>6</sub>, <sup>1</sup>H: 2.50 ppm; <sup>13</sup>C: 39.52 ppm). Hexafluorobenzene was used as internal standard for <sup>19</sup>F NMR. NMR data are reported as following: chemical shift, multiplicity (s = singlet, d = doublet, t = triplet, q = quartet, m = multiplet, br = broad), coupling constant, and integration.

**General Procedure for HATU Coupling:** Carboxylic acid (1.0 eq.), *O*-(7-Azabenzotriazol-1-yl)-*N,N,N,N*'-tetramethyluronium hexafluorophosphate (HATU) (1.2 eq.) and 1-Hydroxy-7-

Azabenzotriazole (HOAt) 0.6M in DMF (1.0 eq.) were dissolved in DMF under argon atmosphere. The solution was cooled to 0 °C and amine was added. After stirring for 5 minutes at 0 °C, Hünig's base (3 - 4 eq.) was added. The reaction mixture was stirred at 0 °C for 1 hr. After completion of reaction (1 h, monitored by LCMS), water (10 mL) was added to quench the reaction and the mixture was further stirred for 30 minutes. Product was isolated either by ethyl acetate extraction or filtering the precipitate.

**General Procedure for EDC Coupling:** Carboxylic acid (1.0 eq.), *N*-(3-Dimethylaminopropyl)-*N'*-ethylcarbodiimide hydrochloride (EDC) (1.2 eq.) and 1-hydroxybenzotriazole (HOBt) (1.3 eq.) were dissolved in DMF under argon atmosphere. The solution was cooled to 0 °C and *t*-butylamine was added. After stirring for 5 minutes at 0 °C, Hünig's base (2 – 3 eq.) was added. The reaction mixture was allowed to warm to room temperature gradually and stirred at room temperature overnight. Product was isolated either by ethyl acetate extraction or filtering the precipitate.

**General Procedure for Boc-Deprotection:** The substrate was dissolved in dichloromethane and the solution was cooled to 0 °C. Trifluoroacetic acid (20% v/v with respect to dichloromethane) was added to the solution drop wise at 0 °C with constant stirring. The mixture was allowed to warm to room temperature slowly (over a period of 1 hour), and stirred until the completion of reaction (monitored by LCMS). Excess trifluoroacetic acid and dichloromethane were removed under vacuum and crude was dried under vacuum.

**General Procedure for *O*-Debenzylation:** The substrate was dissolved in methanol. Palladium on carbon (10%) was added carefully. Residual air from the flask was removed and the mixture was stirred at room temperature for 3 – 4 hours under hydrogen atmosphere using a hydrogen

balloon. After completion of reaction, the mixture was filtered through celite. Filtrate was evaporated and dried under vacuum to give product.

**General Procedure for *N*-Sulfonamide Preparation of Amines:** The primary amine (generally TFA salt) was dissolved in dichloromethane. The solution was cooled to 0 °C and triethylamine (2.0 – 3.0 eq.) was added. Sulfonyl chloride (1.5 eq.) was added to the solution in one portion and reaction mixture was warmed to room temperature (over 15 minutes). After completion of reaction (2 - 3 h), dichloromethane was evaporated and crude was purified by HPLC to give pure product.

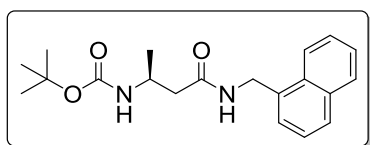

***t*-butyl (S)-4-((naphthalen-1-ylmethyl)amino)-4-oxobutan-2-yl)carbamate (PKS2261):** The title compound was synthesized by

following the general protocol for HATU mediated coupling of Boc-L-β-homoalanine and 1-naphthylmethylamine on a 1.5 mmol scale. After completion of reaction, water was added to reaction mixture to give white precipitate. Precipitate was filtered, washed with water and dried in air to give product (490 mg, 95%) as a white solid. <sup>1</sup>H NMR (500 MHz, DMSO-*d*<sub>6</sub>) δ 8.38 (t, *J* = 5.7 Hz, 1H), 8.06 – 8.04 (m, 1H), 7.95 – 7.93 (m, 1H), 7.86 – 7.84 (m, 1H), 7.56 – 7.52 (m, 2H), 7.48 – 7.42 (m, 2H), 6.72 (d, *J* = 8.3 Hz, 1H), 4.76 – 4.68 (m, 2H), 3.89 – 3.80 (m, 1H), 2.35 (dd, *J* = 13.9, 5.7 Hz, 1H), 2.18 (dd, *J* = 13.9, 8.2 Hz, 1H), 1.37 (s, 9H), 1.01 (d, *J* = 6.5 Hz, 3H).

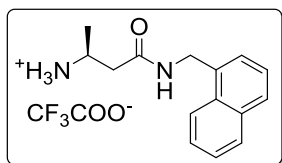

**(S)-3-amino-*N*-(naphthalen-1-ylmethyl)butanamide** **2,2,2-trifluoroacetate** (PKS2245): The title compound was prepared by

following the general protocol for Boc-deprotection of PKS2261 (480 mg, 1.40 mmol). The crude yellow paste was triturated with diethyl ether and kept standing overnight. The white solid was filtered and dried to give product (480 mg, 96%). <sup>1</sup>H NMR (500 MHz, DMSO-*d*<sub>6</sub>) δ 8.69 (t, *J* = 5.7 Hz, 1H), 8.06 – 8.05 (m, 1H), 7.97 – 7.95 (m, 1H), 7.88 (dd, *J* = 7.4, 2.0 Hz,



1H), 7.80 (bs, 3H), 7.58 – 7.53 (m, 2H), 7.50 – 7.45 (m, 2H), 4.79 (dd,  $J = 15.0, 5.7$  Hz, 1H), 4.73 (dd,  $J = 15.0, 5.5$  Hz, 1H), 3.57 – 3.50 (m, 1H), 2.51 – 2.43 (m, 2H), 1.17 (d,  $J = 6.5$  Hz, 3H).

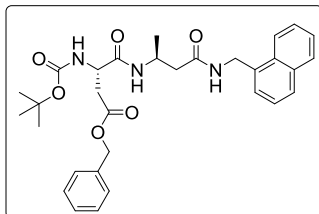

**Benzyl (S)-3-((*t*-butoxycarbonyl)amino)-4-(((S)-4-((naphthalen-1-ylmethyl)amino)-4-oxobutan-2-yl)amino)-4-oxobutanoate**

(PKS2265): The title compound was synthesized by following the general protocol for HATU mediated coupling of Boc-Asp(OBn)-OH (142.3 mg, 0.44 mmol) and PKS2245 (143 mg, 0.40 mmol). After completion of reaction, water was added to reaction mixture to give white precipitate. Precipitate was filtered, washed with water and dried in air to give product (202 mg, 92%) as a white solid.  $^1\text{H}$  NMR (500 MHz, DMSO- $d_6$ )  $\delta$  8.41 (t,  $J = 5.8$  Hz, 1H), 8.06 – 8.04 (m, 1H), 7.95 – 7.93 (m, 1H), 7.86 (d,  $J = 8.3$  Hz, 1H), 7.84 (d,  $J = 7.7$  Hz, 1H), 7.56 – 7.51 (m, 2H), 7.47 – 7.42 (m, 2H), 7.36 – 7.29 (m, 5H), 7.11 (d,  $J = 8.3$  Hz, 1H), 5.10 – 5.05 (m, 2H), 4.76 – 4.68 (m, 2H), 4.30 – 4.25 (m, 1H), 4.14 – 4.08 (m, 1H), 2.73 – 2.69 (m, 1H), 2.57 (dd,  $J = 16.1, 8.8$  Hz, 1H), 2.34 (dd,  $J = 14.1, 5.6$  Hz, 1H), 2.23 (dd,  $J = 14.1, 7.5$  Hz, 1H), 1.37 (s, 9H), 1.03 (d,  $J = 6.6$  Hz, 3H).

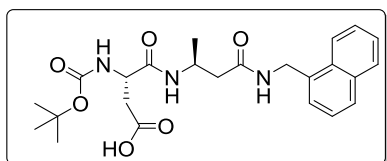

**(S)-3-((*t*-butoxycarbonyl)amino)-4-(((S)-4-((naphthalen-1-ylmethyl)amino)-4-oxobutan-2-yl)amino)-4-oxobutanoic acid**

(PKS2267): The title compound was synthesized by following the *O*-debenzylation protocol of PKS2265 (202 mg, 0.37 mmol). Product (168 mg, quant.) was isolated as white solid.  $^1\text{H}$  NMR (500 MHz, DMSO- $d_6$ )  $\delta$  8.44 – 8.41 (m, 1H), 8.06 – 8.04 (m, 1H), 7.95 – 7.94 (m, 1H), 7.85 (d,  $J = 8.0$  Hz, 1H), 7.81 (d,  $J = 8.3$  Hz, 1H), 7.57 – 7.52 (m, 2H), 7.48 – 7.43 (m, 2H), 7.02 (d,  $J = 8.2$  Hz, 1H), 4.75 (dd,  $J = 15.1, 5.7$  Hz, 1H), 4.70 (dd,  $J = 15.1, 5.7$  Hz, 1H), 4.21 – 4.16 (m, 1H), 4.13 – 4.08 (m, 1H), 2.58 (dd,  $J = 16.4, 5.1$  Hz, 1H), 2.43 (dd,  $J$

= 16.4, 8.5 Hz, 1H), 2.35 (dd,  $J = 14.1, 5.4$  Hz, 1H), 2.23 (dd,  $J = 14.1, 7.7$  Hz, 1H), 1.38 (s, 9H), 1.03 (d,  $J = 6.6$  Hz, 3H).

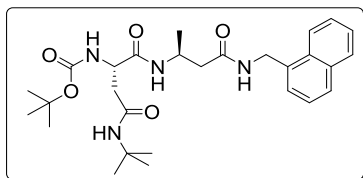

***t*-butyl ((*S*)-4-(*t*-butylamino)-1-(((*S*)-4-((naphthalen-1-ylmethyl)amino)-4-oxobutan-2-yl)amino)-1,4-dioxobutan-2-yl)carbamate (PKS2272):** The title compound was synthesized

following the general protocol of EDC mediated coupling of PKS2267 (168 mg, 0.367 mmol) and *t*-butyl amine (58  $\mu$ L, 0.551 mmol). A white precipitate appeared which was filtered, washed with water and dried in air to give product (170 mg, 90%) as a white solid.  $^1\text{H}$  NMR (500 MHz, DMSO- $d_6$ )  $\delta$  8.43 (t,  $J = 5.6$  Hz, 1H), 8.06 – 8.04 (m, 1H), 7.95 – 7.94 (m, 1H), 7.86 – 7.81 (m, 2H), 7.57 – 7.52 (m, 2H), 7.48 – 7.43 (m, 2H), 7.34 (s, 1H), 6.76 (d,  $J = 8.3$  Hz, 1H), 4.75 (dd,  $J = 15.1, 5.7$  Hz, 1H), 4.70 (dd,  $J = 15.1, 5.5$  Hz, 1H), 4.19 – 4.07 (m, 2H), 2.36 – 2.21 (m, 4H), 1.37 (s, 9H), 1.22 (s, 9H), 1.03 (d,  $J = 6.6$  Hz, 3H). HRMS calc. for C<sub>28</sub>H<sub>40</sub>N<sub>4</sub>O<sub>5</sub>Na [M+Na]<sup>+</sup>: 535.2883. Found: 535.2896.

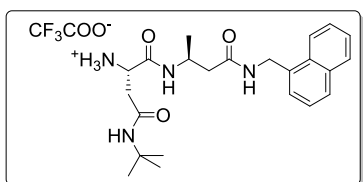

**(*S*)-2-amino-*N*<sup>4</sup>-(*t*-butyl)-*N*<sup>1</sup>-((*S*)-4-((naphthalen-1-ylmethyl)amino)-4-oxobutan-2-yl)succinamide 2,2,2-trifluoroacetate (PKS2248):** The title compound was prepared by

following the general protocol for Boc-Deprotection of PKS2272 (62 mg, 0.12 mmol). The crude was treated with diethyl ether and kept standing 3 hours. The white solid was filtered and dried to give product (60 mg, 95%).  $^1\text{H}$  NMR (500 MHz, DMSO- $d_6$ )  $\delta$  8.47 (t,  $J = 5.6$  Hz, 1H), 8.32 (d,  $J = 7.9$  Hz, 1H), 8.06 – 8.03 (m, 4H), 7.96 – 7.95 (m, 1H), 7.87 – 7.85 (m, 1H), 7.80 (s, 1H), 7.57 – 7.53 (m, 2H), 7.49 – 7.43 (m, 2H), 4.78 (dd,  $J = 15.1, 5.8$  Hz, 1H), 4.69 (dd,  $J = 15.1, 5.4$  Hz, 1H),

4.21 – 4.13 (m, 1H), 3.95 (m, 1H), 2.60 (dd,  $J = 16.7, 4.6$  Hz, 1H), 2.55 – 2.49 (m, 1H), 2.34 (dd,  $J = 14.1, 5.7$  Hz, 1H), 2.26 (dd,  $J = 14.1, 8.0$  Hz, 1H), 1.26 (s, 9H), 1.07 (d,  $J = 6.6$  Hz, 3H).

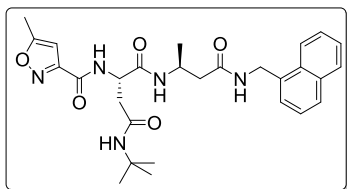

**(S)-N<sup>4</sup>-(*t*-butyl)-2-(5-methylisoxazole-3-carboxamido)-N<sup>1</sup>-((S)-4-((naphthalen-1-ylmethyl)amino)-4-oxobutan-2-yl)succinamide**  
(PKS2249): The title compound was prepared by following the

general protocol for HATU mediated coupling of 5-methylisoxazole-3-carboxylic acid (5.6 mg, 0.044 mmol) and PKS2248 (21.1 mg, 0.04 mmol). After completion of reaction, the mixture was purified by HPLC to give pure product (14.4 mg, 69%) as white solid. <sup>1</sup>H NMR (500 MHz, DMSO-*d*<sub>6</sub>) δ 8.50 (d,  $J = 8.1$  Hz, 1H), 8.41 (t,  $J = 5.7$  Hz, 1H), 8.05 – 8.03 (m, 1H), 7.99 (d,  $J = 8.1$  Hz, 1H), 7.95 – 7.93 (m, 1H), 7.84 (d,  $J = 8.0$  Hz, 1H), 7.57 – 7.51 (m, 2H), 7.48 – 7.42 (m, 3H), 6.53 (s, 1H), 4.74 (dd,  $J = 15.1, 5.7$  Hz, 1H), 4.68 (dd,  $J = 15.1, 5.5$  Hz, 1H), 4.63 (td,  $J = 8.4, 4.8$  Hz, 1H), 4.16 – 4.08 (m, 1H), 2.54 (dd,  $J = 14.3, 8.7$  Hz, 1H), 2.45 (s, 3H), 2.41 (dd,  $J = 14.3, 4.8$  Hz, 1H), 2.35 (dd,  $J = 14.0, 5.7$  Hz, 1H), 2.25 (dd,  $J = 14.0, 7.7$  Hz, 1H), 1.18 (s, 9H), 1.04 (d,  $J = 6.6$  Hz, 3H). <sup>13</sup>C NMR (126 MHz, DMSO) δ 171.3, 169.9, 169.2, 168.9, 158.6, 158.2, 134.6, 133.3, 130.9, 128.5, 127.6, 126.2, 125.8, 125.6, 125.4, 123.5, 101.4, 50.5, 50.1, 42.6, 41.6, 40.2, 38.3, 28.4, 20.0, 11.9. HRMS calc. for C<sub>28</sub>H<sub>35</sub>N<sub>5</sub>O<sub>5</sub>Na [M+Na]<sup>+</sup>: 544.2536. Found: 544.2537.

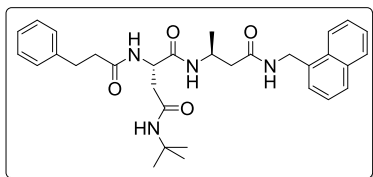

**(S)-N<sup>4</sup>-(*t*-butyl)-N<sup>1</sup>-((S)-4-((naphthalen-1-ylmethyl)amino)-4-oxobutan-2-yl)-2-(3-phenylpropanamido)succinamide**  
(PKS2251): The title compound was prepared by following the

general protocol for HATU mediated coupling of 3-phenylpropanoic acid (5.0 mg, 0.033 mmol) and PKS2248 (15.8 mg, 0.03 mmol). After completion of reaction, the mixture was purified by

HPLC to give pure product (14.3 mg, 88%) as white solid.  $^1\text{H}$  NMR (500 MHz,  $\text{DMSO}-d_6$ )  $\delta$  8.44 (t,  $J = 5.7$  Hz, 1H), 8.06 – 8.04 (m, 1H), 7.99 (d,  $J = 8.1$  Hz, 1H), 7.95 – 7.93 (m, 1H), 7.86 – 7.83 (m, 2H), 7.57 – 7.53 (m, 2H), 7.49 – 7.43 (m, 2H), 7.33 (s, 1H), 7.26 – 7.23 (m, 2H), 7.20 – 7.14 (m, 3H), 4.75 (dd,  $J = 15.1, 5.7$  Hz, 1H), 4.71 (dd,  $J = 15.1, 5.6$  Hz, 1H), 4.48 (td,  $J = 8.2, 5.6$  Hz, 1H), 4.14 – 4.06 (m, 1H), 2.82 – 2.78 (m, 2H), 2.44 – 2.33 (m, 4H), 2.29 (dd,  $J = 14.6, 8.3$  Hz, 1H), 2.23 (dd,  $J = 14.1, 7.8$  Hz, 1H), 1.21 (s, 9H), 1.03 (d,  $J = 6.6$  Hz, 3H).  $^{13}\text{C}$  NMR (126 MHz,  $\text{DMSO}$ )  $\delta$  171.1, 170.0, 169.9, 168.7, 141.3, 134.6, 133.3, 130.9, 128.5, 128.3, 128.1, 127.6, 126.2, 125.8, 125.8, 125.6, 125.4, 123.5, 50.1, 50.0, 42.3, 41.5, 40.2, 38.7, 36.9, 31.0, 28.4, 19.9. HRMS calc. for  $\text{C}_{32}\text{H}_{40}\text{N}_4\text{O}_4\text{Na}$   $[\text{M}+\text{Na}]^+$ : 567.2947. Found: 567.2961.

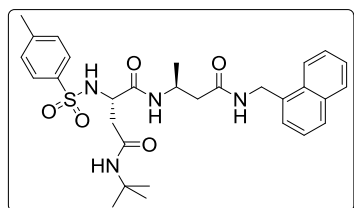

**(S)- $N^4$ -(*t*-butyl)-2-((4-methylphenyl)sulfonamido)- $N^1$ -((S)-4-((naphthalen-1-ylmethyl)amino)-4-oxobutan-2-yl)succinamide**  
(PKS2252): The title compound was prepared by following the

general procedure for *N*-sulfonamide formation of PKS2248 (21.1 mg, 0.04 mmol) with tosyl chloride (11.5 mg, 0.06 mmol). The product was isolated as white solid (12.7 mg, 56%) after HPLC purification.  $^1\text{H}$  NMR (500 MHz,  $\text{DMSO}-d_6$ )  $\delta$  8.38 (t,  $J = 5.7$  Hz, 1H), 8.05 – 8.03 (m, 1H), 7.95 – 7.93 (m, 1H), 7.84 (d,  $J = 8.1$  Hz, 1H), 7.78 (d,  $J = 8.1$  Hz, 1H), 7.71 (bs, 1H), 7.65 (d,  $J = 8.2$  Hz, 2H), 7.56 – 7.52 (m, 2H), 7.48 – 7.41 (m, 2H), 7.32 – 7.29 (m, 3H), 4.73 (dd,  $J = 15.1, 5.7$  Hz, 1H), 4.68 (dd,  $J = 15.1, 5.6$  Hz, 1H), 4.01 (m, 1H), 3.94 – 3.85 (m, 1H), 2.33 (s, 3H), 2.29 – 2.15 (m, 3H), 2.11 (dd,  $J = 14.1, 8.2$  Hz, 1H), 1.18 (s, 9H), 0.83 (d,  $J = 6.6$  Hz, 3H).  $^{13}\text{C}$  NMR (126 MHz,  $\text{DMSO}$ )  $\delta$  169.7, 168.9, 168.0, 142.4, 138.3, 134.6, 133.3, 130.9, 129.2, 128.5, 127.6,

126.6, 126.2, 125.8, 125.6, 125.4, 123.5, 53.6, 50.1, 42.2, 41.5, 40.1, 39.4, 28.4, 20.9, 19.4. HRMS calc. for C<sub>30</sub>H<sub>38</sub>N<sub>4</sub>O<sub>5</sub>SSNa [M+Na]<sup>+</sup>: 589.2461. Found: 589.2432.

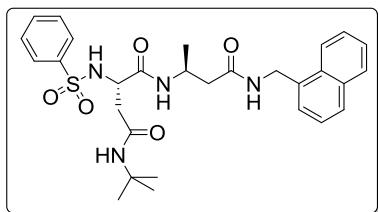

**(S)-N<sup>4</sup>-(t-butyl)-N<sup>1</sup>-((S)-4-((naphthalen-1-ylmethyl)amino)-4-oxobutan-2-yl)-2-(phenylsulfonamido)succinamide**

(PKS2260): The title compound was prepared by following the general procedure for *N*-sulfonamide formation of PKS2248 (12.1 mg, 0.023 mmol) with phenylsulfonyl chloride (4 μL, 0.028 mmol). The product was isolated as white solid (10.0 mg, 79%) after HPLC purification. <sup>1</sup>H NMR (500 MHz, DMSO-*d*<sub>6</sub>) δ 8.37 (t, *J* = 5.7 Hz, 1H), 8.04 – 8.02 (m, 1H), 7.95 – 7.93 (m, 1H), 7.85 – 7.81 (m, 3H), 7.77 (d, *J* = 7.6 Hz, 2H), 7.60 – 7.41 (m, 7H), 7.32 (s, 1H), 4.73 (dd, *J* = 15.1, 5.8 Hz, 1H), 4.68 (dd, *J* = 15.1, 5.5 Hz, 1H), 4.07 – 4.03 (m, 1H), 3.92 – 3.86 (m, 1H), 2.28 – 2.17 (m, 3H), 2.12 (dd, *J* = 14.1, 8.3 Hz, 1H), 1.18 (s, 9H), 0.83 (d, *J* = 6.6 Hz, 3H). <sup>13</sup>C NMR (126 MHz, DMSO-*d*<sub>6</sub>) δ 169.7, 168.8, 168.0, 141.2, 134.6, 133.3, 132.2, 130.9, 128.8, 128.5, 127.6, 126.5, 126.2, 125.8, 125.6, 125.4, 123.5, 53.6, 50.1, 42.2, 41.6, 40.1, 39.7, 28.4, 19.5. HRMS calc. for C<sub>29</sub>H<sub>36</sub>N<sub>4</sub>O<sub>5</sub>SSNa [M+Na]<sup>+</sup>: 575.2304. Found: 575.2314.

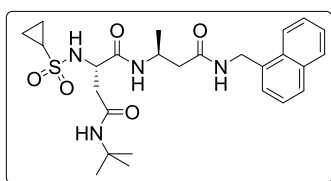

**(S)-N<sup>4</sup>-(t-butyl)-2-(cyclopropanesulfonamido)-N<sup>1</sup>-((S)-4-((naphthalen-1-ylmethyl)amino)-4-oxobutan-2-yl)succinamide**

(PKS2295): The title compound was prepared by following the general procedure for *N*-sulfonamide formation of PKS2248 (21.1 mg, 0.04 mmol) with cyclopropylsulfonyl chloride (6 μL, 0.06 mmol). The product was isolated as white solid (16.3 mg, 79%) after HPLC purification. <sup>1</sup>H NMR (500 MHz, DMSO-*d*<sub>6</sub>) δ 8.42 (t, *J* = 5.6 Hz, 1H), 8.06 – 8.04 (m, 1H), 7.97 – 7.94 (m, 2H), 7.85 (d, *J* = 7.9 Hz, 1H), 7.57 – 7.52 (m, 2H), 7.48 – 7.43 (m,

2H), 7.40 (s, 1H), 7.26 (d,  $J = 9.1$  Hz, 1H), 4.75 (dd,  $J = 15.1, 5.7$  Hz, 1H), 4.70 (dd,  $J = 15.1, 5.5$  Hz, 1H), 4.17 – 4.06 (m, 2H), 2.50 – 2.46 (m, 1H), 2.41 – 2.32 (m, 3H), 2.25 (dd,  $J = 14.1, 8.0$  Hz, 1H), 1.23 (s, 9H), 1.04 (d,  $J = 6.6$  Hz, 3H), 0.90 – 0.82 (m, 4H).  $^{13}\text{C}$  NMR (126 MHz, DMSO- $d_6$ )  $\delta$  169.9, 169.7, 168.4, 134.6, 133.3, 130.9, 128.5, 127.6, 126.2, 125.8, 125.6, 125.4, 123.5, 53.7, 50.1, 42.4, 41.6, 40.1, 39.8, 30.3, 28.5, 19.8, 5.1, 4.8. HRMS calc. for C<sub>28</sub>H<sub>40</sub>N<sub>4</sub>O<sub>5</sub>Na [M+Na]<sup>+</sup>: 535.2896. Found: 535.2883.

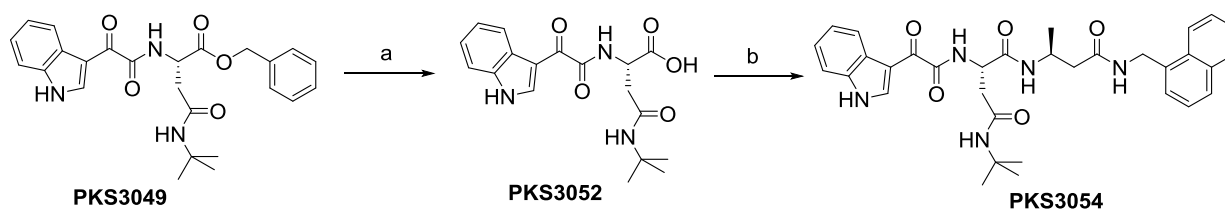

**Scheme S1.** Synthetic route of PKS3054. Reagents and conditions: a) Pd/C (10%), H<sub>2</sub>, methanol; b) **PKS2245**, HATU, HOAt, Hünig's base, DMF

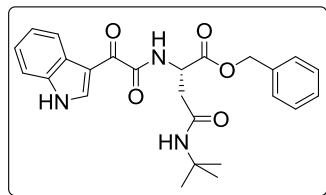

**Benzyl N<sup>2</sup>-(2-(1H-indol-3-yl)-2-oxoacetyl)-N<sup>4</sup>-(*t*-butyl)-L-**

**asparinate (PKS3049):** The title compound was synthesized following the general protocol for HATU mediated coupling of 3-

indoleglyoxylic acid (189 mg, 1.0 mmol) and H-Asn(*t*-Bu)-OH.TFA salt (432 mg, 1.1 mmol). The compound was isolated by ethyl acetate extraction and purified by column chromatography to give product (270 mg, 60%) as off-white solid.  $^1\text{H}$  NMR (500 MHz, Chloroform- $d$ )  $\delta$  10.14 (s, 1H), 9.13 (d,  $J = 3.3$  Hz, 1H), 8.42 – 8.34 (m, 2H), 7.47 (dd,  $J = 6.6, 2.3$  Hz, 1H), 7.34 – 7.23 (m, 7H), 5.54 (s, 1H), 5.23 (d,  $J = 12.4$  Hz, 1H), 5.19 – 5.12 (m, 1H), 5.11 – 5.03 (m, 1H), 2.80 (dd,  $J = 15.2, 5.8$  Hz, 1H), 2.74 (dd,  $J = 15.2, 5.3$  Hz, 1H), 1.29 (s, 9H).  $^{13}\text{C}$  NMR (126 MHz, CDCl<sub>3</sub>)  $\delta$  179.6, 170.8, 168.8, 162.6, 139.3, 136.2, 135.3, 128.7, 128.6, 128.4, 126.9, 124.1, 123.3, 122.4, 113.1, 112.1, 67.7, 52.0, 49.6, 39.2, 28.8.

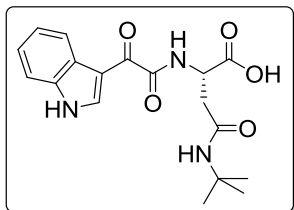

**N<sup>2</sup>-(2-(1H-indol-3-yl)-2-oxoacetyl)-N<sup>4</sup>-(t-butyl)-L-asparagine**

(PKS3052): The title compound was synthesized following the general protocol for *O*-debenzylation of PKS3049 (265 mg, 0.59 mmol). Isolated

crude was purified by HPLC to give product (112 mg, 53%) as off-white solid. <sup>1</sup>H NMR (500 MHz, DMSO-*d*<sub>6</sub>) δ 12.81 (s, 1H), 12.27 (d, *J* = 3.3 Hz, 1H), 8.82 – 8.75 (m, 2H), 8.26 – 8.20 (m, 1H), 7.57 (s, 1H), 7.56 – 7.52 (m, 1H), 7.32 – 7.23 (m, 2H), 4.69 – 4.60 (m, 1H), 2.67 (dd, *J* = 15.1, 7.2 Hz, 1H), 2.59 (dd, *J* = 15.1, 5.0 Hz, 1H), 1.22 (s, 9H). <sup>13</sup>C NMR (126 MHz, DMSO) δ 181.2, 172.3, 168.8, 162.8, 138.6, 136.2, 126.1, 123.5, 122.7, 121.2, 112.6, 112.1, 50.2, 49.0, 37.2, 28.4.

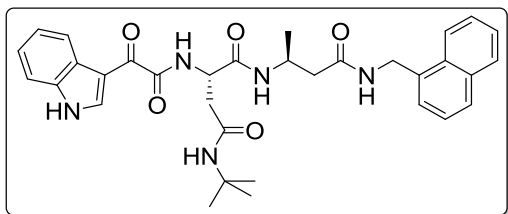

**(S)-2-(2-(1H-indol-3-yl)-2-oxoacetamido)-N<sup>4</sup>-(t-**

**butyl)-N<sup>1</sup>-((S)-4-((naphthalen-1-ylmethyl)amino)-4-oxobutan-2-yl)succinamide** (PKS3054): The title

compound was synthesized by following the general protocol for HATU mediated coupling of PKS3052 (7.2 mg, 0.02) and PKS2245 (7.8 mg, 0.022 mmol). The reaction mixture was purified by HPLC to give product (4.0 mg, 34%) as white solid. <sup>1</sup>H NMR (500 MHz, DMSO-*d*<sub>6</sub>) δ 12.24 (d, *J* = 3.6 Hz, 1H), 8.81 (d, *J* = 3.1 Hz, 1H), 8.70 (d, *J* = 8.4 Hz, 1H), 8.41 (t, *J* = 5.7 Hz, 1H), 8.28 – 8.21 (m, 1H), 8.02 (dd, *J* = 6.3, 3.4 Hz, 1H), 7.98 (d, *J* = 8.0 Hz, 1H), 7.93 (dd, *J* = 6.2, 3.4 Hz, 1H), 7.83 (d, *J* = 8.0 Hz, 1H), 7.58 – 7.48 (m, 4H), 7.48 – 7.37 (m, 2H), 7.31 – 7.23 (m, 2H), 4.74 (dd, *J* = 15.2, 5.7 Hz, 1H), 4.67 (dd, *J* = 15.2, 5.5 Hz, 1H), 4.62 – 4.54 (m, 1H), 4.20 – 4.09 (m, 1H), 2.59 (dd, *J* = 14.5, 8.4 Hz, 1H), 2.43 (dd, *J* = 14.5, 4.7 Hz, 1H), 2.36 (dd, *J* = 14.0, 5.8 Hz, 1H), 2.26 (dd, *J* = 14.0, 7.7 Hz, 1H), 1.20 (s, 9H), 1.06 (d, *J* = 6.6 Hz, 3H). HRMS calc. for C<sub>33</sub>H<sub>37</sub>N<sub>5</sub>O<sub>5</sub>Na [M+Na]<sup>+</sup>: 606.2708. Found: 606.2692.

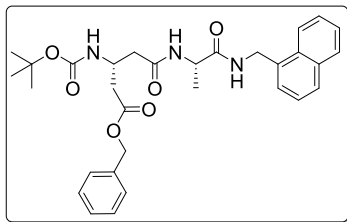

**Benzyl (*R*)-3-((*t*-butoxycarbonyl)amino)-5-(((*S*)-1-((naphthalen-1-ylmethyl)amino)-1-oxopropan-2-yl)amino)-5-oxopentanoate**

(PKS2266): The title compound was synthesized by following the general protocol for HATU mediated coupling of *N*-Boc-*L*-β-

glutamic acid 5-benzyl ester (84 mg, 0.25 mmol) and H-Ala-CH<sub>2</sub>-naphth TFA salt (94 mg, 0.275 mmol). After completion of reaction, water was added to reaction mixture to give white precipitate. Precipitate was filtered, washed with water and dried in air to give product (115 mg, 84%) as a white solid. <sup>1</sup>H NMR (500 MHz, DMSO-*d*<sub>6</sub>) δ 8.40 (t, *J* = 5.6 Hz, 1H), 8.11 (d, *J* = 7.4 Hz, 1H), 8.04 – 8.02 (m, 1H), 7.95 – 7.93 (m, 1H), 7.83 (d, *J* = 7.9 Hz, 1H), 7.56 – 7.51 (m, 2H), 7.47 – 7.41 (m, 2H), 7.37 – 7.30 (m, 5H), 6.82 (d, *J* = 8.3 Hz, 1H), 5.05 (s, 2H), 4.77 – 4.69 (m, 2H), 4.33 – 4.28 (m, 1H), 4.22 – 4.13 (m, 1H), 2.55 (dd, *J* = 15.0, 5.0 Hz, 1H), 2.49 – 2.44 (m, 1H), 2.38 (dd, *J* = 14.6, 6.3 Hz, 1H), 2.32 (dd, *J* = 14.6, 7.5 Hz, 1H), 1.34 (s, 9H), 1.21 (d, *J* = 7.1 Hz, 3H).

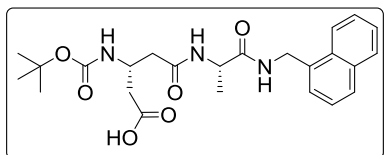

**(*R*)-3-((*t*-butoxycarbonyl)amino)-5-(((*S*)-1-((naphthalen-1-ylmethyl)amino)-1-oxopropan-2-yl)amino)-5-oxopentanoic acid** (PKS2268): The title compound was synthesized by

following the *O*-debenzylation protocol of PKS2266 (110 mg, 0.2 mmol). Product (92 mg, quant.) was isolated as white solid. <sup>1</sup>H NMR (500 MHz, DMSO-*d*<sub>6</sub>) δ 8.49 (t, *J* = 5.8 Hz, 1H), 8.16 (d, *J* = 7.4 Hz, 1H), 8.04 (d, *J* = 7.8 Hz, 1H), 7.94 (d, *J* = 7.3 Hz, 1H), 7.83 (d, *J* = 7.8 Hz, 1H), 7.56 – 7.51 (m, 2H), 7.48 – 7.42 (m, 2H), 6.74 (d, *J* = 8.2 Hz, 1H), 4.74 – 4.71 (m, 2H), 4.33 – 4.28 (m, 1H), 4.11 – 4.04 (m, 1H), 2.41 – 2.29 (m, 4H), 1.35 (s, 9H), 1.23 (d, *J* = 7.1 Hz, 3H).



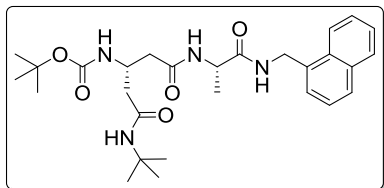

***t*-butyl ((*R*)-1-(*t*-butylamino)-5-(((*S*)-1-((naphthalen-1-ylmethyl)amino)-1-oxopropan-2-yl)amino)-1,5-dioxopentan-3-yl)carbamate (PKS2271):** The title compound was prepared by

following the general protocol for EDC mediated coupling of PKS2268 (92 mg, 0.2 mmol) and *t*-butylamine (31.5  $\mu$ L, 0.3 mmol). After completion of reaction, water was added to reaction mixture to give white precipitate. Precipitate was filtered, washed with water and dried in air to give product (85 mg, 83%) as a white solid.  $^1\text{H}$  NMR (500 MHz, DMSO- $d_6$ )  $\delta$  8.44 (t,  $J = 5.9$  Hz, 1H), 8.05 – 8.03 (m, 2H), 7.95 – 7.93 (m, 1H), 7.84 (d,  $J = 7.7$  Hz, 1H), 7.56 – 7.53 (m, 2H), 7.48 – 7.43 (m, 2H), 7.34 (s, 1H), 6.56 (d,  $J = 8.4$  Hz, 1H), 4.78 – 4.69 (m, 2H), 4.34 – 4.28 (m, 1H), 4.10 – 4.00 (m, 1H), 2.36 - 2.12 (m, 4H), 1.35 (s, 9H), 1.23 – 1.22 (m, 12H).

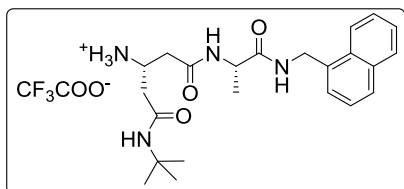

**(*R*)-3-amino- $N^1$ -(*t*-butyl)- $N^5$ -((*S*)-1-((naphthalen-1-ylmethyl)amino)-1-oxopropan-2-yl)pentanediamide 2,2,2-trifluoroacetate (PKS2273):** The title compound was

synthesized by following the general protocol for Boc-deprotection of PKS2271 (80 mg, 0.156 mmol).  $^1\text{H}$  NMR (500 MHz, DMSO- $d_6$ )  $\delta$  8.54 (t,  $J = 5.7$  Hz, 1H), 8.46 (d,  $J = 7.3$  Hz, 1H), 8.05 – 8.03 (m, 1H), 7.96 – 7.94 (m, 1H), 7.89 – 7.82 (m, 5H), 7.56 – 7.54 (m, 2H), 7.49 – 7.43 (m, 2H), 4.78 (dd,  $J = 15.4, 5.9$  Hz, 1H), 4.70 (dd,  $J = 15.4, 5.5$  Hz, 1H), 4.39 – 4.33 (m, 1H), 3.67 – 3.61 (m, 1H), 2.53 – 2.49 (m, 2H), 2.42 (dd,  $J = 15.9, 5.8$  Hz, 1H), 2.36 (dd,  $J = 15.9, 7.2$  Hz, 1H), 1.26 - 1.24 (m, 12H).

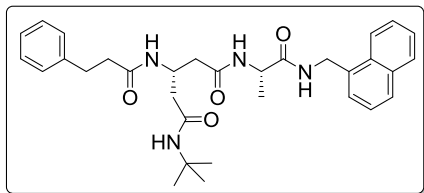

**(R)-N<sup>1</sup>-(t-butyl)-N<sup>5</sup>-((S)-1-((naphthalen-1-ylmethyl)amino)-1-oxopropan-2-yl)-3-(3-phenylpropanamido)pentanediamide (PKS2278):** The title

compound was synthesized by following the general protocol for HATU mediated coupling of 3-phenylpropanoic acid (6.6 mg, 0.044 mmol) and PKS2273 (21.1 mg, 0.04 mmol). After completion of reaction, mixture was purified by HPLC to give pure product (20.7 mg, 95%) as a white solid. <sup>1</sup>H NMR (500 MHz, DMSO-*d*<sub>6</sub>) δ 8.44 – 8.42 (m, 1H), 8.07 (d, *J* = 7.3 Hz, 1H), 8.02 – 8.00 (m, 1H), 7.95 – 7.93 (m, 1H), 7.83 (d, *J* = 7.9 Hz, 1H), 7.68 (d, *J* = 8.1 Hz, 1H), 7.54 – 7.52 (m, 2H), 7.45 – 7.39 (m, 2H), 7.37 (s, 1H), 7.24 – 7.21 (m, 2H), 7.16 – 7.13 (m, 3H), 4.71 (d, *J* = 5.7 Hz, 2H), 4.33 – 4.29 (m, 2H), 2.76 – 2.73 (m, 2H), 2.37 – 2.16 (m, 6H), 1.24 – 1.22 (m, 12H). <sup>13</sup>C NMR (126 MHz, DMSO) δ 172.4, 170.5, 169.7, 169.4, 141.3, 134.4, 133.2, 130.7, 128.5, 128.2, 128.1, 127.4, 126.1, 125.8, 125.7, 125.4, 124.9, 123.3, 50.0, 48.4, 44.2, 40.7, 40.1, 39.7, 37.2, 31.1, 28.5, 18.2. HRMS calc. for C<sub>32</sub>H<sub>40</sub>N<sub>4</sub>O<sub>4</sub>Na [M+Na]<sup>+</sup>: 567.2935. Found: 567.2947.

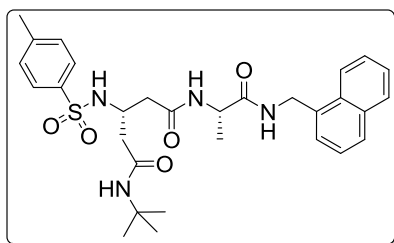

**(R)-N<sup>1</sup>-(t-butyl)-3-(4-methylphenylsulfonamido)-N<sup>5</sup>-((S)-1-((naphthalen-1-ylmethyl)amino)-1-oxopropan-2-yl)pentanediamide (PKS2279):** The title compound was

prepared by following the general procedure for *N*-sulfonamide formation of PKS2273 (21.1 mg, 0.04 mmol) with tosyl chloride (11.4 mg, 0.06 mmol). The product was isolated as white solid (17.8 mg, 78%) after HPLC purification. <sup>1</sup>H NMR (500 MHz, DMSO-*d*<sub>6</sub>) δ 8.42 (t, *J* = 5.8 Hz, 1H), 8.08 – 8.03 (m, 2H), 7.95 – 7.94 (m, 1H), 7.84 (d, *J* = 7.9 Hz, 1H), 7.66 (d, *J* = 8.4 Hz, 2H), 7.55 – 7.53 (m, 2H), 7.48 – 7.42 (m, 3H), 7.39 (s, 1H), 7.32 (d, *J* = 8.0 Hz, 2H), 4.78 – 4.70 (m, 2H), 4.28 – 4.23 (m, 1H), 3.81 – 3.74 (m, 1H), 2.35 (s, 3H), 2.29

– 2.20 (m, 2H), 2.13 (d,  $J = 6.6$  Hz, 2H), 1.20 – 1.18 (m, 12H).  $^{13}\text{C}$  NMR (126 MHz, DMSO)  $\delta$  172.2, 169.2, 168.9, 142.4, 138.5, 134.4, 133.2, 130.8, 129.5, 128.5, 127.5, 126.5, 126.1, 125.8, 125.4, 125.1, 123.4, 50.1, 48.5, 48.3, 40.7, 40.1, 40.0, 28.4, 20.9, 18.3. HRMS calc. for  $\text{C}_{30}\text{H}_{38}\text{N}_4\text{O}_5\text{SNa}$   $[\text{M}+\text{Na}]^+$ : 589.2466. Found: 589.2461.

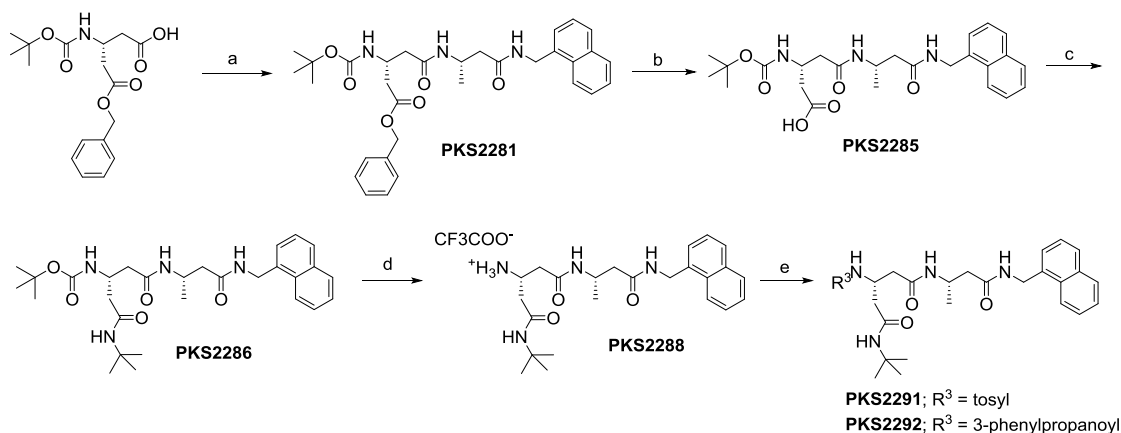

**Scheme S2.** Synthetic route of P1 and P2  $\beta$ -aminoacid based peptidomimetics. Reagents and conditions: a) **PKS2245**, HATU, HOAt, Hünig's base, DMF; b) Pd/C (10%),  $\text{H}_2$ , Methanol; c) *t*-butyl amine, EDC, HOBT, Hünig base, DMF; d) TFA in DCM (20%); e)  $\text{R}^3\text{COOH}$ , HATU, HOAt, Hünig's base, DMF or  $\text{R}^3\text{Cl}$ ,  $\text{Et}_3\text{N}$ , DCM

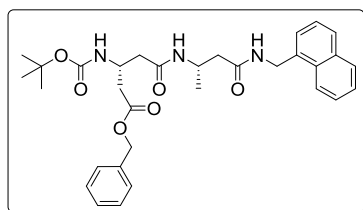

**(R)-benzyl**

**3-((*t*-butoxycarbonyl)amino)-5-(((*S*)-4-**

**((naphthalen-1-ylmethyl)amino)-4-oxobutan-2-yl)amino)-5-**

**oxopentanoate (PKS2281):** The title compound was synthesized

by following the general protocol for HATU mediated coupling of *N*-Boc-*L*-beta-glutamic acid 5-

benzyl ester (47 mg, 0.14 mmol) and *H*-homo- $\beta$ -Ala- $\text{CH}_2$ -naphth TFA salt (50 mg, 0.14 mmol).

The reaction mixture was purified by HPLC to give product (73 mg, 93%) as white solid.  $^1\text{H}$  NMR

(500 MHz,  $\text{DMSO}-d_6$ )  $\delta$  8.39 (t,  $J = 5.5$  Hz, 1H), 8.06 – 8.04 (m, 1H), 7.95 – 7.93 (m, 1H), 7.84

(d,  $J = 7.9$  Hz, 1H), 7.81 (d,  $J = 8.0$  Hz, 1H), 7.56 – 7.51 (m, 2H), 7.48 – 7.42 (m, 2H), 7.37 – 7.30

(m, 5H), 6.79 (d,  $J = 8.5$  Hz, 1H), 5.05 (s, 2H), 4.76 – 4.68 (m, 2H), 4.16 – 4.09 (m, 2H), 2.55 –

2.43 (m, 2H), 2.36 (dd,  $J = 14.0, 5.7$  Hz, 1H), 2.26 – 2.17 (m, 3H), 1.35 (s, 9H), 1.02 (d,  $J = 6.0$  Hz, 3H).

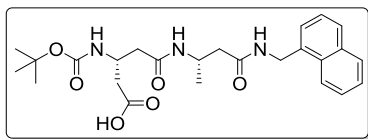

**(R)-3-((*t*-butoxycarbonyl)amino)-5-(((S)-4-((naphthalen-1-ylmethyl)amino)-4-oxobutan-2-yl)amino)-5-oxopentanoic acid**

(PKS2285): The title compound was synthesized by following the *O*-debenzylation protocol of PKS2281 (73 mg, 0.13 mmol). Yield 61.0 mg (quant.).  $^1\text{H-NMR}$  (500 MHz,  $\text{DMSO-}d_6$ )  $\delta$  12.12 (s, 1H), 8.39 (t,  $J = 5.6$  Hz, 1H), 8.06 – 8.04 (m, 1H), 7.95 – 7.93 (m, 1H), 7.85 (d,  $J = 8.0$  Hz, 1H), 7.79 (d,  $J = 8.0$  Hz, 1H), 7.56 – 7.52 (m, 2H), 7.48 – 7.42 (m, 2H), 6.69 (d,  $J = 8.4$  Hz, 1H), 4.77 – 4.68 (m, 2H), 4.15 – 4.01 (m, 2H), 2.38 – 2.34 (m, 3H), 2.26 – 2.16 (m, 3H), 1.36 (s, 9H), 1.02 (d,  $J = 6.6$  Hz, 3H).

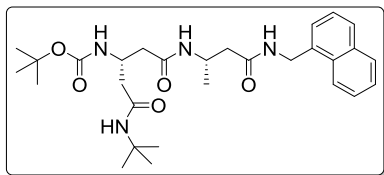

***t*-butyl ((R)-1-(*t*-butylamino)-5-(((S)-4-((naphthalen-1-ylmethyl)amino)-4-oxobutan-2-yl)amino)-1,5-dioxopentan-3-yl)carbamate** (PKS2286): The title compound was prepared by

following the general protocol for EDC mediated coupling of PKS2285 (61.0 mg, 0.13 mmol) and *t*-butylamine (20.0  $\mu\text{L}$ , 0.195 mmol). After completion of reaction, mixture was purified by HPLC to give product (13.0 mg, 19%) as a white solid.  $^1\text{H NMR}$  (500 MHz,  $\text{DMSO-}d_6$ )  $\delta$  8.41 (t,  $J = 5.6$  Hz, 1H), 8.06 – 8.04 (m, 1H), 7.95 – 7.93 (m, 1H), 7.84 (d,  $J = 7.7$  Hz, 1H), 7.72 (d,  $J = 8.1$  Hz, 1H), 7.56- 7.51 (m, 2H), 7.48 – 7.43 (m, 2H), 7.31 (s, 1H), 6.50 (d,  $J = 8.7$  Hz, 1H), 4.77 – 4.68 (m, 2H), 4.18 – 4.10 (m, 1H), 4.06 – 3.98 (m, 1H), 2.36 (dd,  $J = 13.9, 5.6$  Hz, 1H), 2.22 – 2.14 (m, 5H), 1.36 (s, 9H), 1.22 (s, 9H), 1.02 (d,  $J = 6.5$  Hz, 3H).

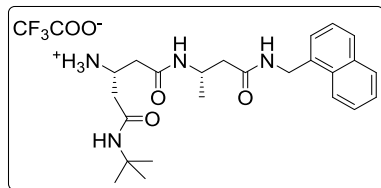

**(*R*)-3-amino-*N*<sup>1</sup>-(*t*-butyl)-*N*<sup>5</sup>-((*S*)-4-((naphthalen-1-ylmethyl)amino)-4-oxobutan-2-yl)pentanediamide 2,2,2-trifluoroacetate (PKS2288):** The title compound was synthesized

by following the general protocol for Boc-deprotection of PKS2286 (13.0 mg, 0.025 mmol). Yield 13.5 mg (quant.). <sup>1</sup>H NMR (500 MHz, Chloroform-*d*) δ 8.65 (bs, 3H), 8.47 (d, *J* = 7.9 Hz, 1H), 7.94 (d, *J* = 8.3 Hz, 1H), 7.86 (d, *J* = 8.1 Hz, 1H), 7.82 – 7.78 (m, 1H), 7.57 – 7.49 (m, 2H), 7.43 – 7.40 (m, 2H), 6.52 (t, *J* = 5.3 Hz, 1H), 5.98 (s, 1H), 4.81 – 4.74 (m, 2H), 4.35 – 4.30 (m, 1H), 3.86 (m, 1H), 2.73 – 2.68 (m, 1H), 2.64 – 2.58 (m, 1H), 2.46 – 2.36 (m, 3H), 2.30 (dd, *J* = 14.2, 8.9 Hz, 1H), 1.32 (s, 9H), 1.18 (d, *J* = 6.6 Hz, 3H).

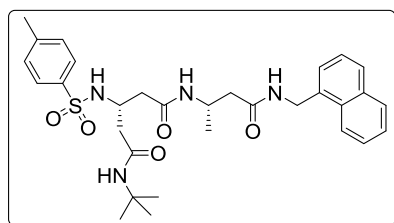

**(*R*)-*N*<sup>1</sup>-(*t*-butyl)-3-(4-methylphenylsulfonamido)-*N*<sup>5</sup>-((*S*)-4-((naphthalen-1-ylmethyl)amino)-4-oxobutan-2-yl)pentanediamide (PKS2291):** The title compound was prepared by following the general procedure for N-sulfonamide

formation of PKS2288 (6.5 mg, 0.012 mmol) with tosyl chloride (4.6 mg, 0.024 mmol). The product was isolated as white solid (5.2 mg, 74%) after HPLC purification. <sup>1</sup>H-NMR (500 MHz, DMSO-*d*<sub>6</sub>) δ 8.40 (t, *J* = 5.6 Hz, 1H), 8.06 – 8.04 (m, 1H), 7.96 – 7.94 (m, 1H), 7.85 (d, *J* = 7.8 Hz, 1H), 7.74 (d, *J* = 8.1 Hz, 1H), 7.67 – 7.66 (m, 2H), 7.55 – 7.52 (m, 2H), 7.47- 7.42 (m, 3H), 7.37 – 7.33 (m, 3H), 4.74 (dd, *J* = 15.2, 5.6 Hz, 1H), 4.70 (dd, *J* = 15.2, 5.6 Hz, 1H), 4.11 – 4.05 (m, 1H), 3.80 – 3.73 (m, 1H), 2.34 (s, 3H), 2.31 (dd, *J* = 13.9, 5.5 Hz, 1H), 2.18 – 2.08 (m, 5H), 1.18 (s, 9H), 0.98 (d, *J* = 6.6 Hz, 3H). <sup>13</sup>C-NMR (126 MHz, DMSO) δ <sup>13</sup>C NMR (126 MHz, DMSO) δ 169.78, 168.9, 168.4, 142.4, 138.6, 134.6, 133.3, 130.9, 129.5, 128.5, 127.6, 126.5,

126.2, 125.8, 125.6, 125.4, 123.5, 50.0, 48.5, 42.2, 41.9, 40.5, 40.1, 40.1, 28.4, 20.9, 20.0. HRMS calc. for C<sub>31</sub>H<sub>40</sub>N<sub>4</sub>O<sub>5</sub>Na [M+Na]<sup>+</sup>: 603.2624. Found: 603.2617.

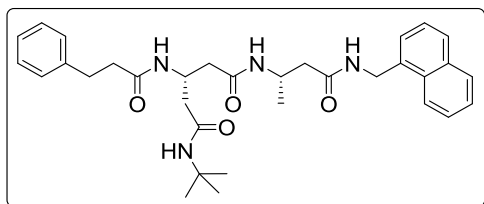

**(R)-N<sup>1</sup>-(t-butyl)-N<sup>5</sup>-((S)-4-((naphthalen-1-ylmethyl)amino)-4-oxobutan-2-yl)-3-(3-**

**phenylpropanamido)pentanediamide (PKS2292):** The

title compound was synthesized by following the general protocol for HATU mediated coupling of 3-phenylpropanoic acid (2.0 mg, 0.012) and PKS2288 (6.5 mg, 0.012 mmol). The reaction mixture was purified by HPLC to give product (6.0 mg, 90%) as white solid. <sup>1</sup>H-NMR (500 MHz, DMSO-*d*<sub>6</sub>) δ 8.40 (t, *J* = 5.6 Hz, 1H), 8.06 – 8.04 (m, 1H), 7.95 – 7.93 (m, 1H), 7.85 (d, *J* = 7.8 Hz, 1H), 7.73 (d, *J* = 8.1 Hz, 1H), 7.64 (d, *J* = 8.3 Hz, 1H), 7.56 – 7.51 (m, 2H), 7.48 – 7.42 (m, 2H), 7.33 (s, 1H), 7.26 – 7.23 (m, 2H), 7.18 – 7.14 (m, 3H), 4.76 – 4.68 (m, 2H), 4.31 – 4.24 (m, 1H), 4.19 – 4.10 (m, 1H), 2.78 (t, *J* = 7.9 Hz, 2H), 2.38 – 2.30 (m, 3H), 2.23 – 2.17 (m, 5H), 1.22 (s, 9H), 1.02 (d, *J* = 6.6 Hz, 3H). <sup>13</sup>C-NMR (126 MHz, DMSO) δ 170.5, 169.8, 169.4, 168.8, 141.3, 134.6, 133.3, 130.9, 128.5, 128.2, 128.1, 127.6, 126.2, 125.8, 125.8, 125.6, 125.4, 123.5, 49.9, 44.2, 42.2, 42.0, 40.6, 40.1, 40.1, 37.2, 31.2, 28.5, 20.1. HRMS calc. for C<sub>33</sub>H<sub>42</sub>N<sub>4</sub>O<sub>4</sub>Na [M+Na]<sup>+</sup>: 581.3112. Found: 581.3104.

Table S2. Purity of compounds determined by integrating peak areas in ELSD spectra.

| ID      | Purity (%) |
|---------|------------|
| PKS2249 | 97.3       |
| PKS2251 | 100        |
| PKS2252 | 95.9       |
| PKS2260 | 100        |
| PKS2272 | 100        |
| PKS2295 | 100        |
| PKS3054 | 100        |
| PKS2278 | 100        |
| PKS2279 | 100        |
| PKS2291 | 100        |
| PKS2292 | 97.8       |

Reference:

- [1] a) H. Fan, N. G. Angelo, J. D. Warren, C. F. Nathan, G. Lin, *ACS Med Chem Lett* **2014**, *5*, 405-410; b) G. Lin, T. Chidawanyika, C. Tsu, T. Warriar, J. Vaubourgeix, C. Blackburn, K. Gigstad, M. Sintchak, L. Dick, C. Nathan, *J Am Chem Soc* **2013**, *135*, 9968-9971.
- [2] G. Vogt, C. Nathan, *J Clin Invest* **2011**, *121*, 3889-3901.
- [3] B. Webb, A. Sali, *Curr Protoc Bioinformatics* **2014**, *47*, 5 6 1-32.
- [4] W. Sherman, T. Day, M. P. Jacobson, R. A. Friesner, R. Farid, *J Med Chem* **2006**, *49*, 534-553.
- [5] E. Harder, W. Damm, J. Maple, C. Wu, M. Reboul, J. Y. Xiang, L. Wang, D. Lupyan, M. K. Dahlgren, J. L. Knight, J. W. Kaus, D. S. Cerutti, G. Krilov, W. L. Jorgensen, R. Abel, R. A. Friesner, *J Chem Theory Comput* **2016**, *12*, 281-296.
- [6] C. Blackburn, K. M. Gigstad, P. Hales, K. Garcia, M. Jones, F. J. Bruzzese, C. Barrett, J. X. Liu, T. A. Soucy, D. S. Sappal, N. Bump, E. J. Olhava, P. Fleming, L. R. Dick, C. Tsu, M. D. Sintchak, J. L. Blank, *Biochem J* **2010**, *430*, 461-476.



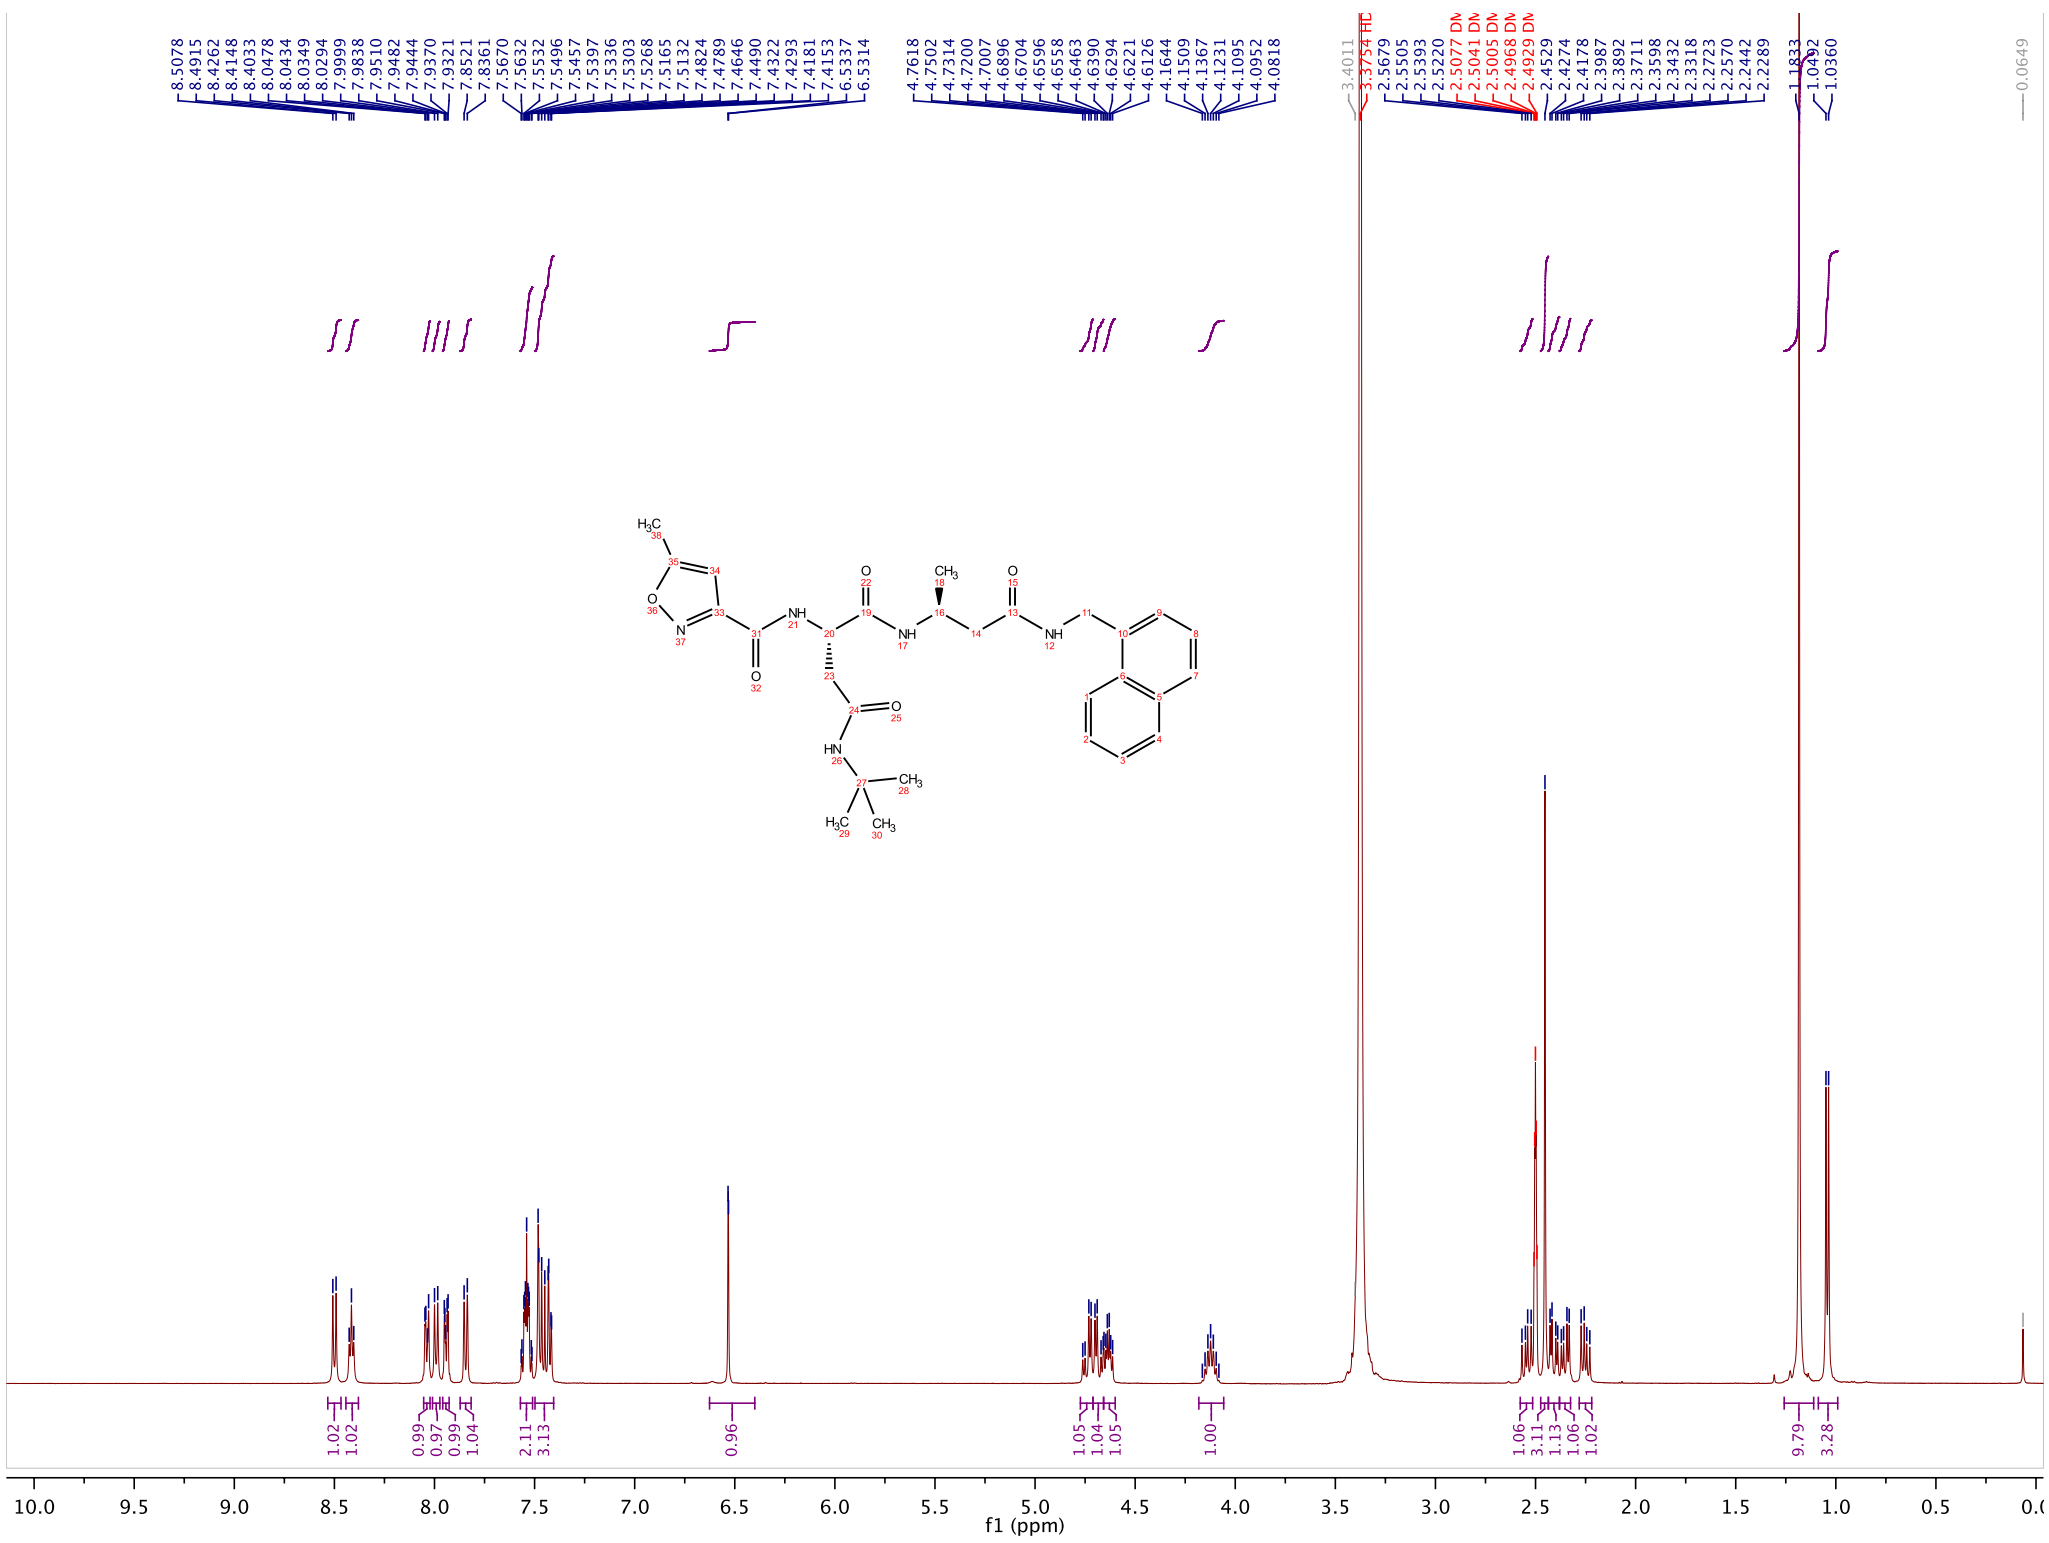

— 0.0649

171.3393  
169.9002  
169.2235  
168.8559

158.5840  
158.2428

134.5731  
133.3166  
130.8903  
128.5291  
127.6153  
126.2469  
125.8496  
125.6170  
125.4323  
123.5171

101.3507

50.5100  
50.1380

42.5703  
41.6087  
40.1858

40.0191 DMSO

39.7744 DMSO  
39.6856 DMSO  
39.6049 DMSO  
39.5190 DMSO  
39.3518 DMSO  
39.1850 DMSO

39.0180  
38.3274  
28.3817

19.9755

11.8608

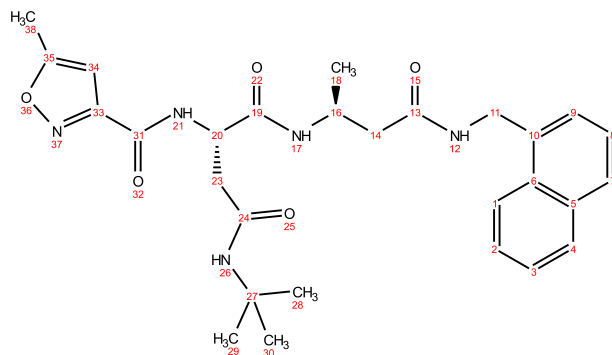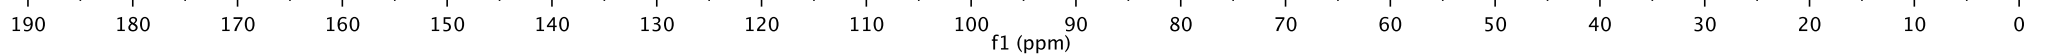

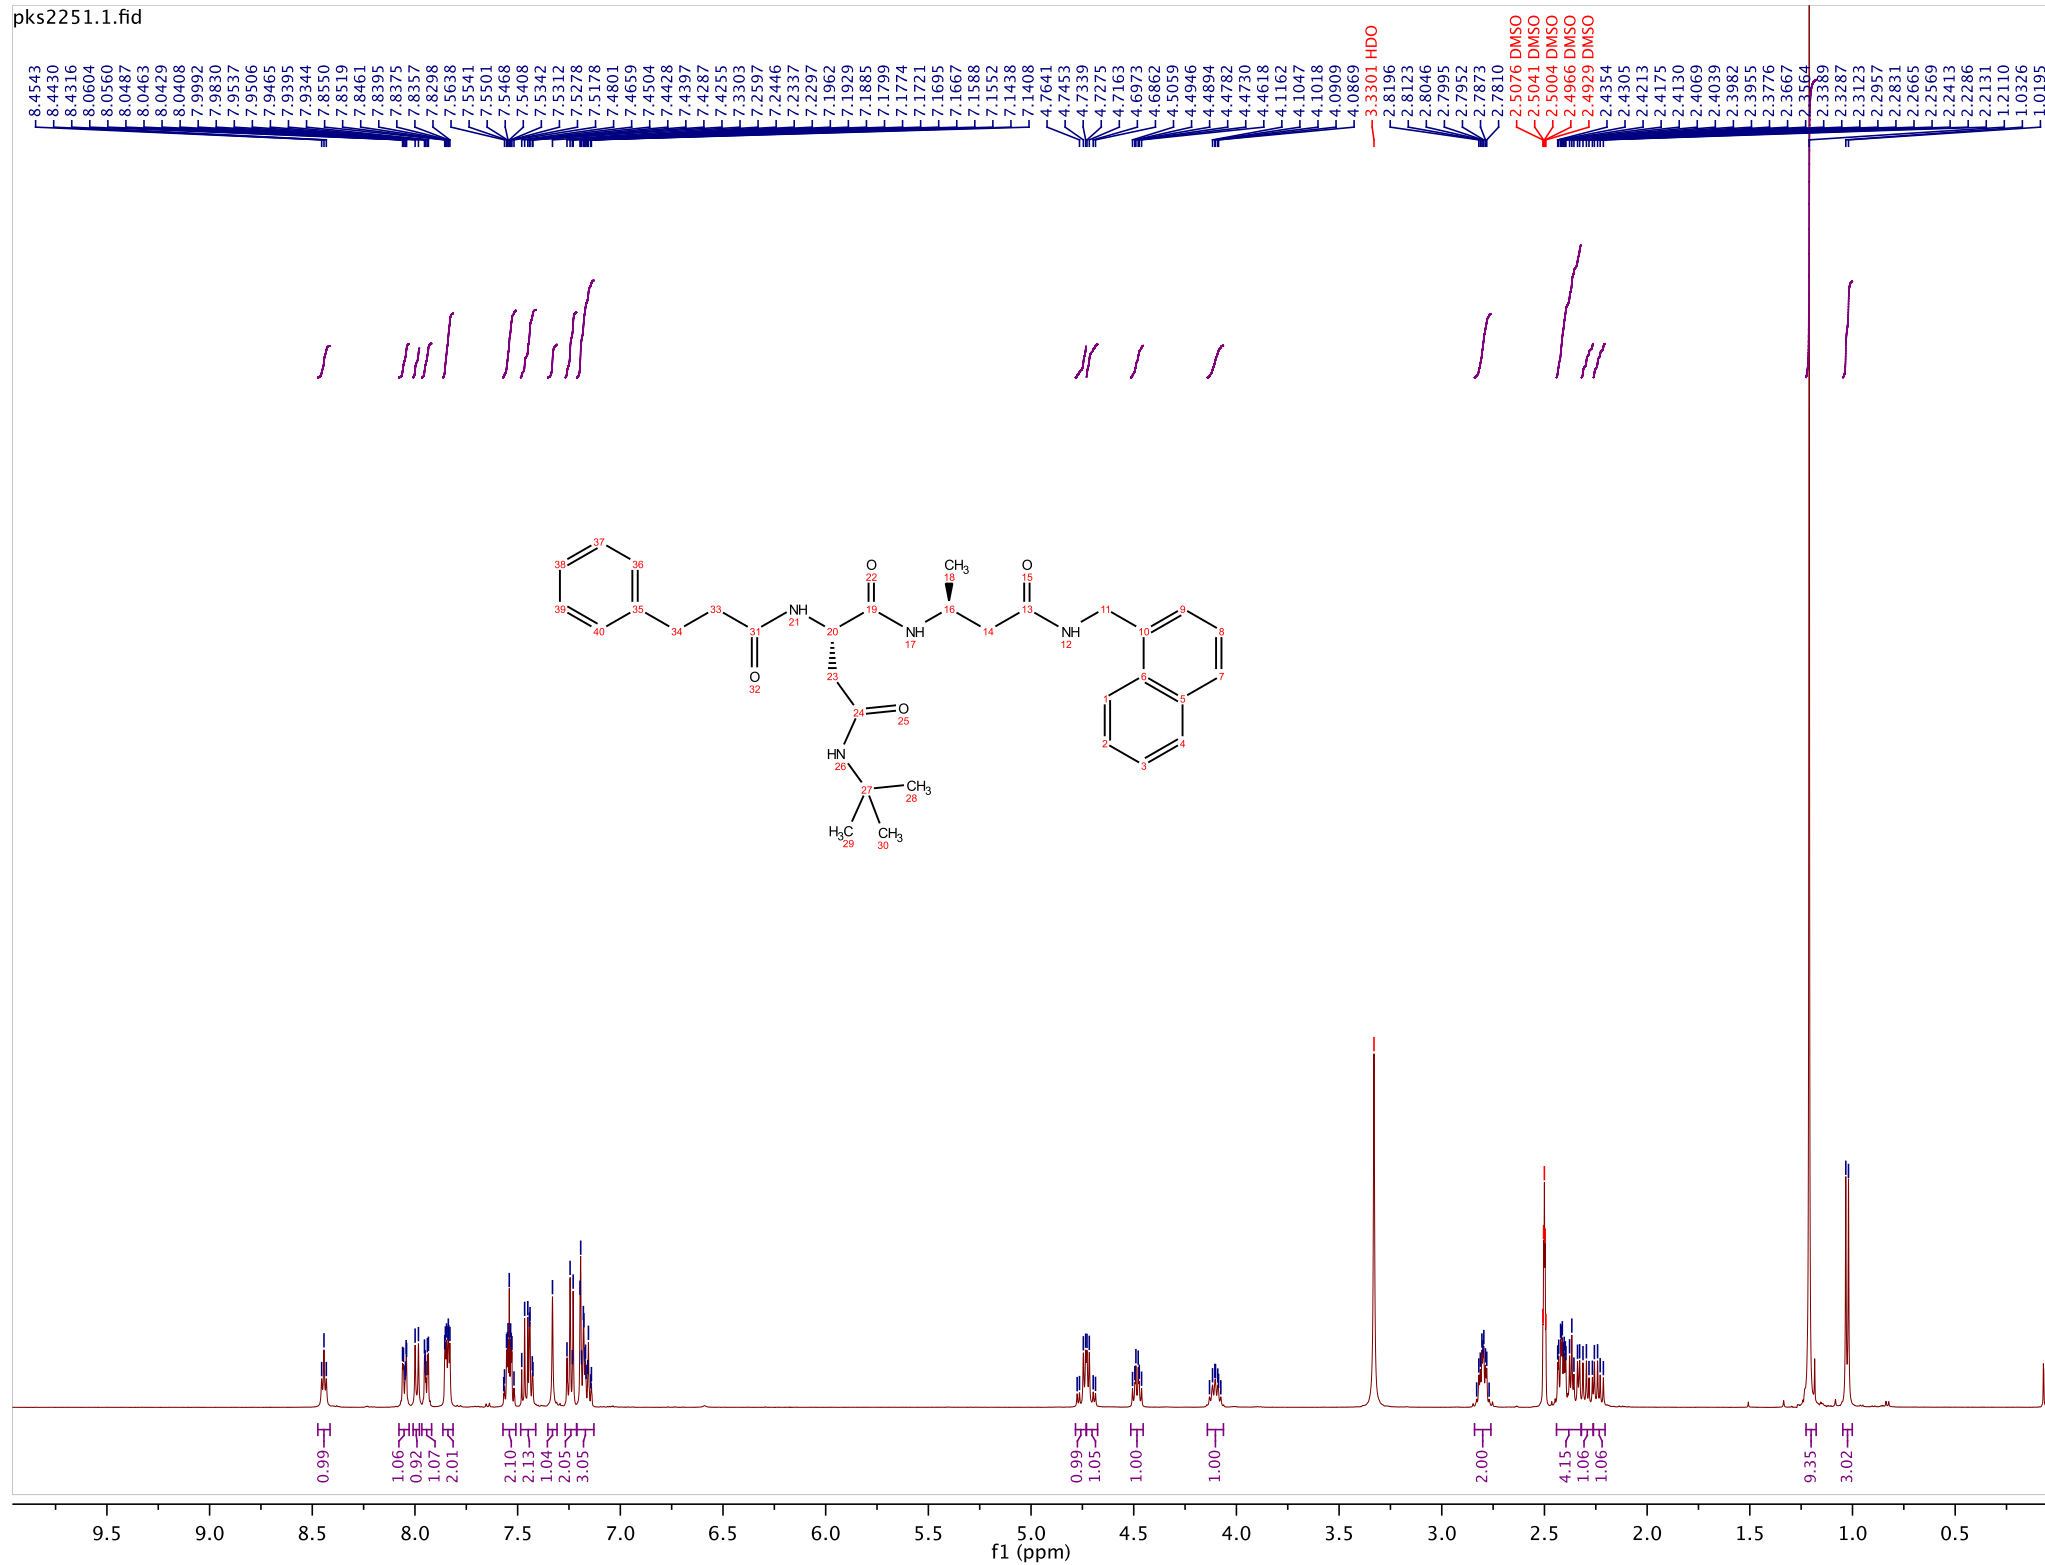

171.1042  
169.9691  
169.9199  
168.7470

141.3066  
134.5596  
133.2780  
130.8590  
128.4851  
128.2543  
128.1136  
127.5650  
126.1896  
125.8198  
125.7936  
125.5866  
125.3835  
123.4832

50.0954  
50.0194  
42.3207  
41.5020  
40.1466  
40.0198 DMSO  
39.9438 DMSO  
39.8526 DMSO  
39.7741 DMSO  
39.6857 DMSO  
39.6034 DMSO  
39.5192 DMSO  
39.4364 DMSO  
39.3540 DMSO  
39.1852 DMSO  
39.0184 DMSO  
38.7310  
36.8888  
31.0049  
28.4425

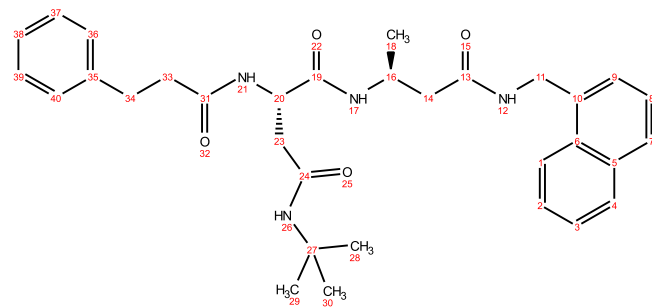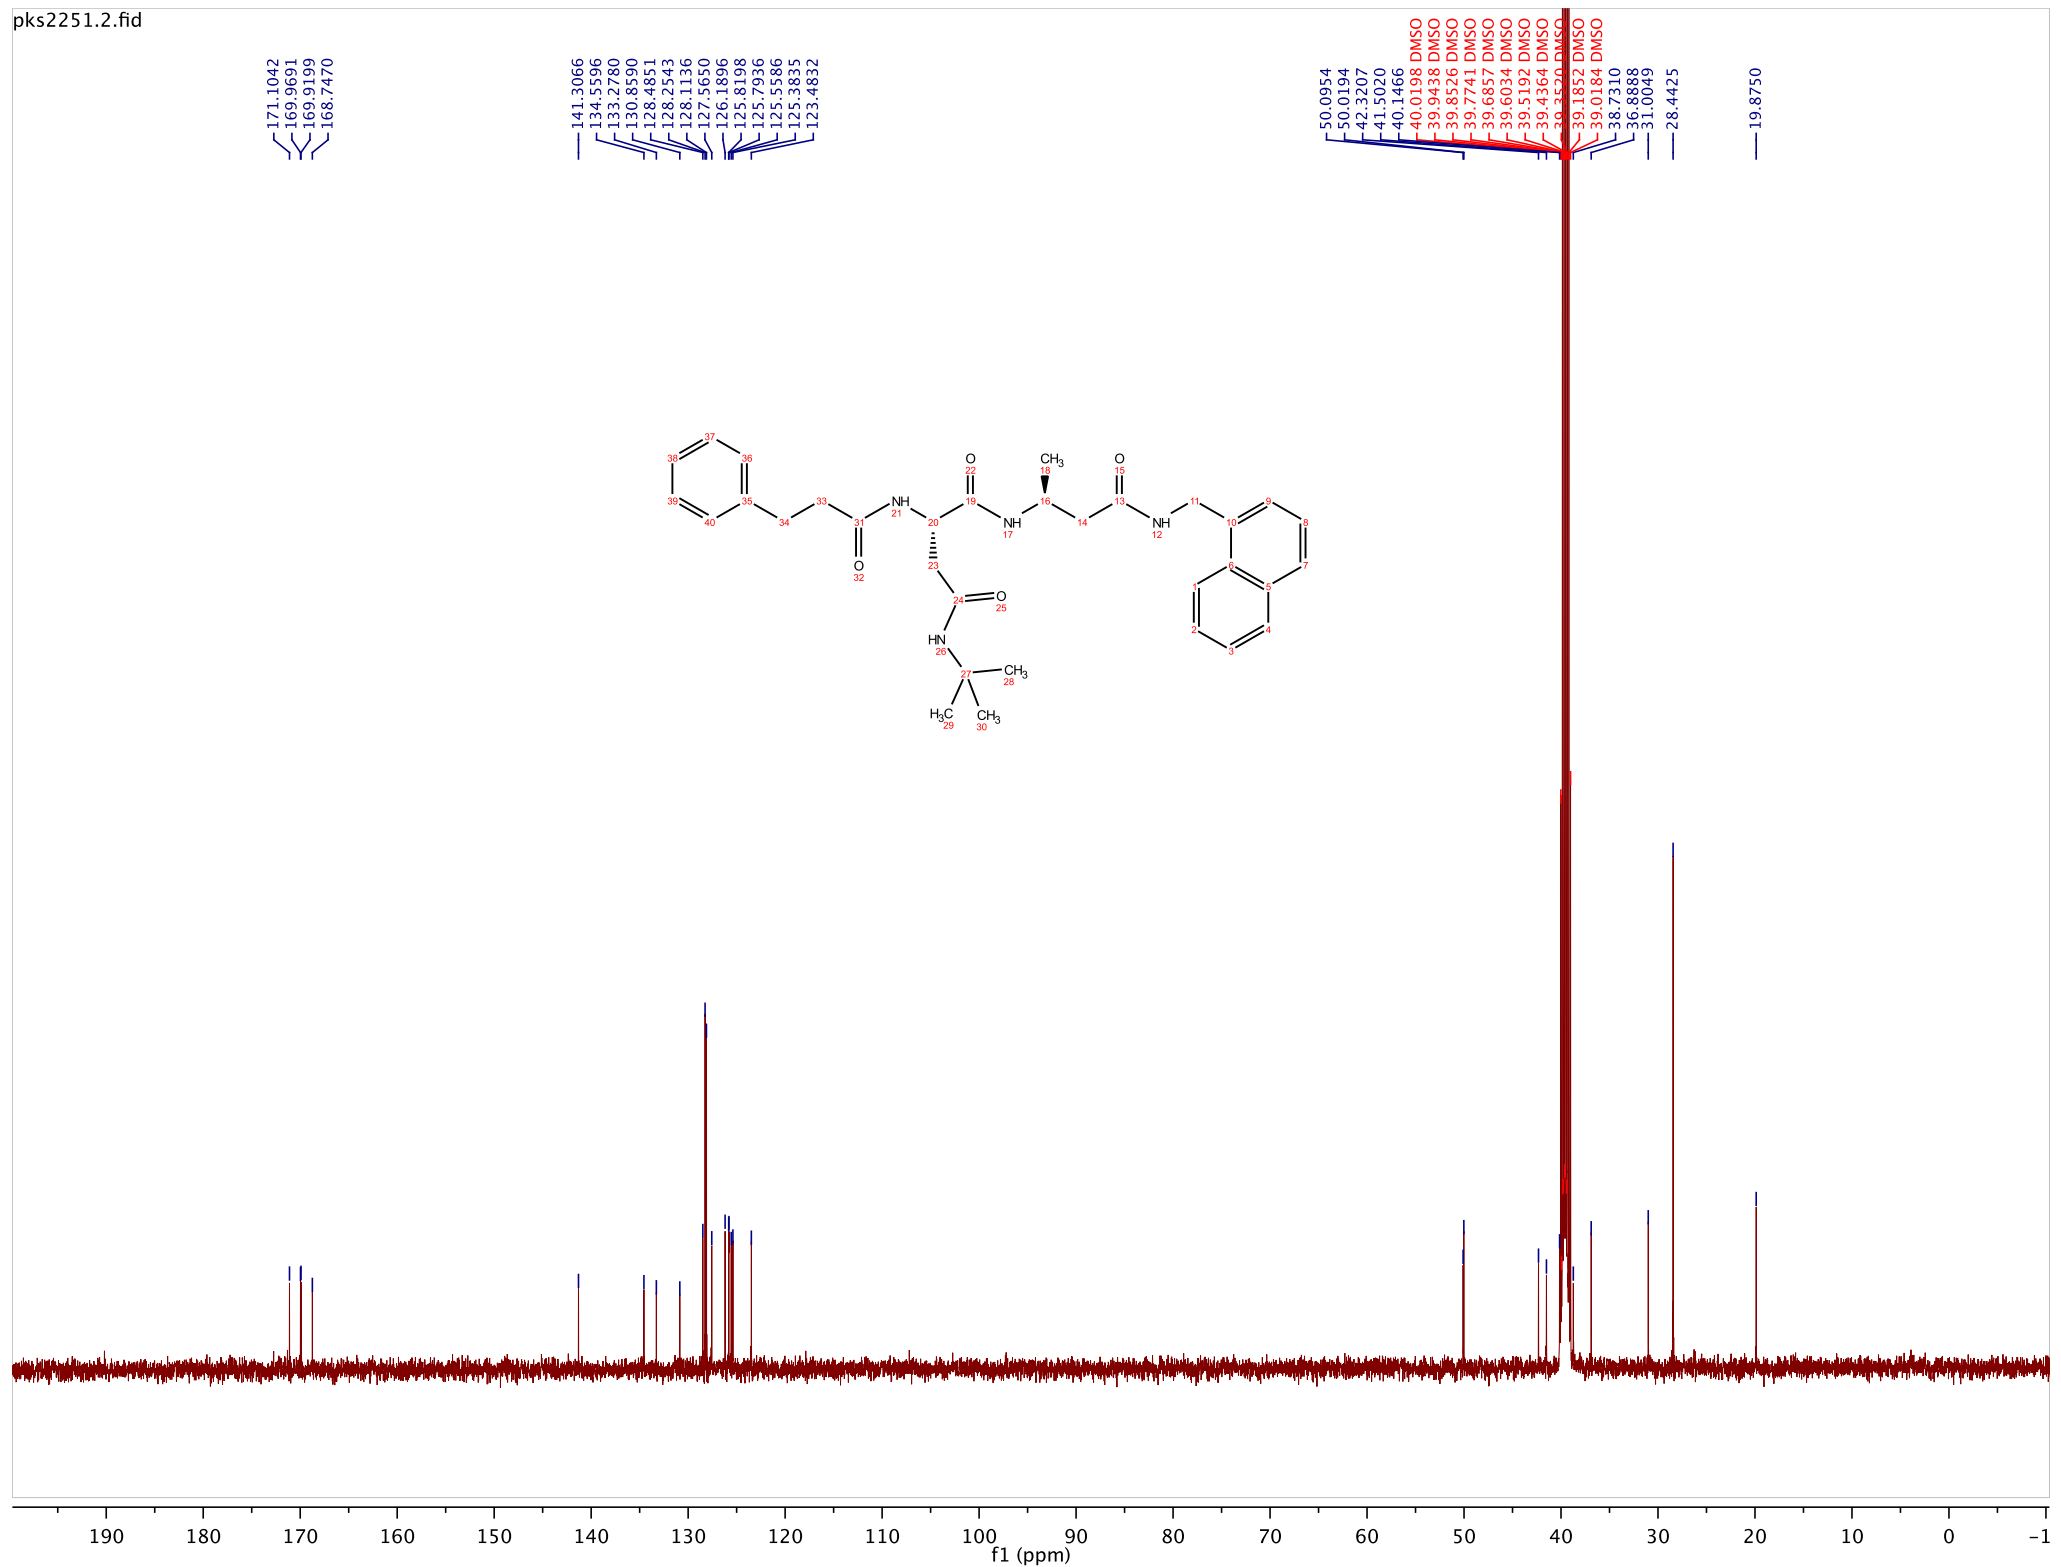

190 180 170 160 150 140 130 120 110 100 90 80 70 60 50 40 30 20 10 0 -1

f1 (ppm)

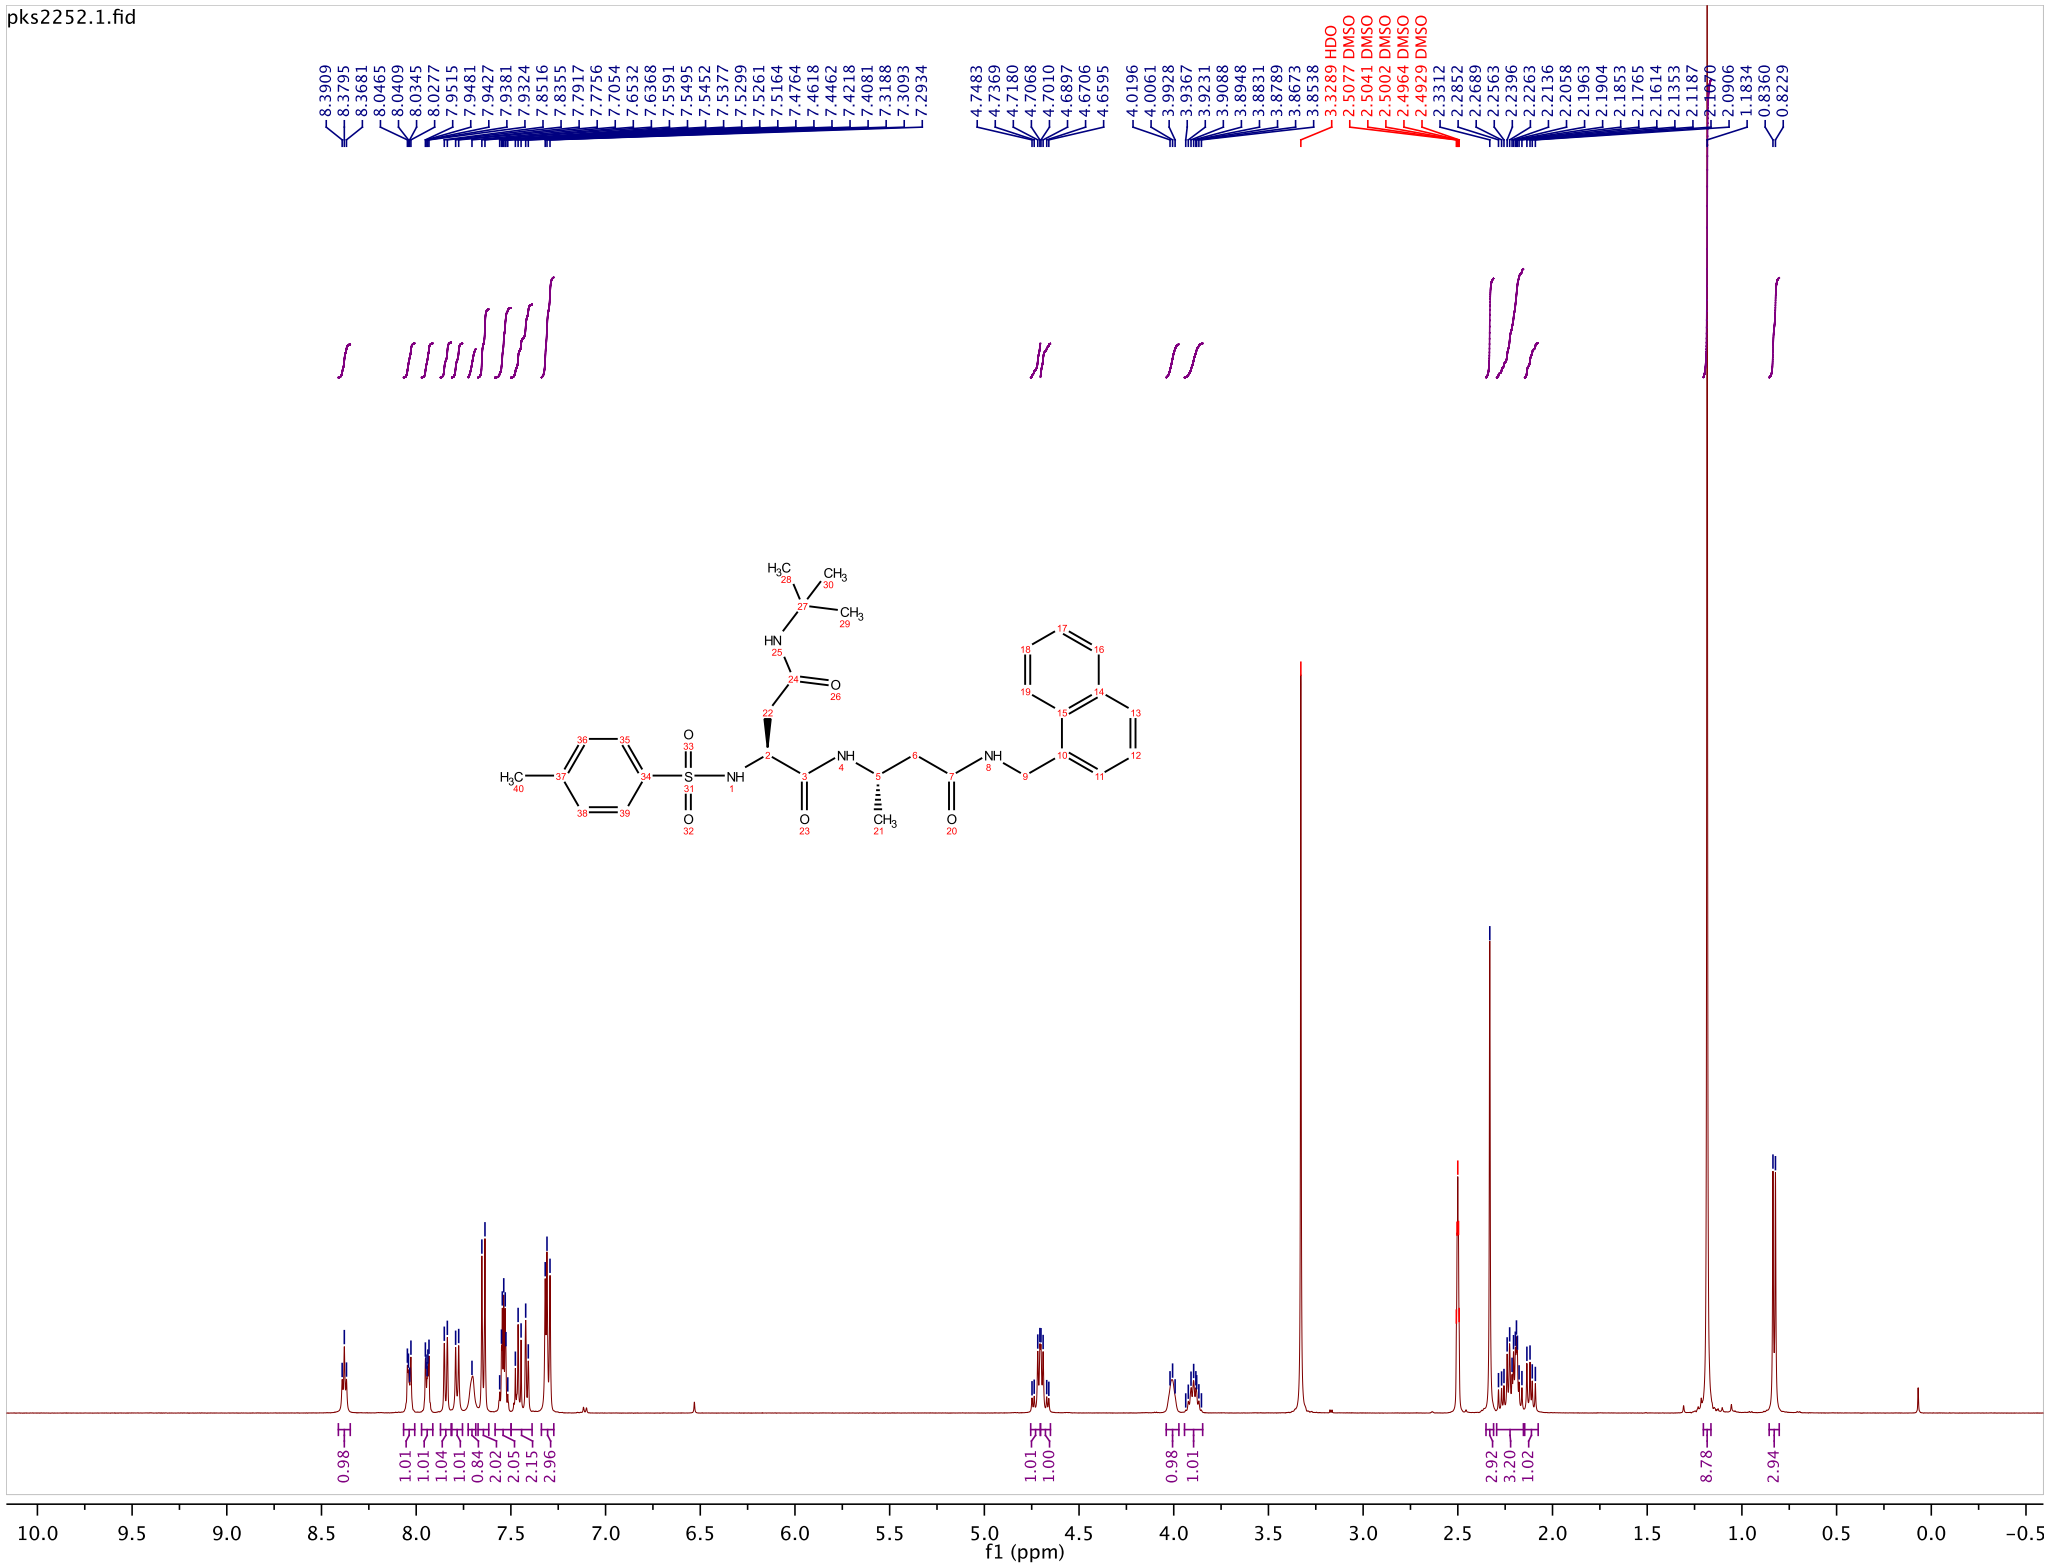

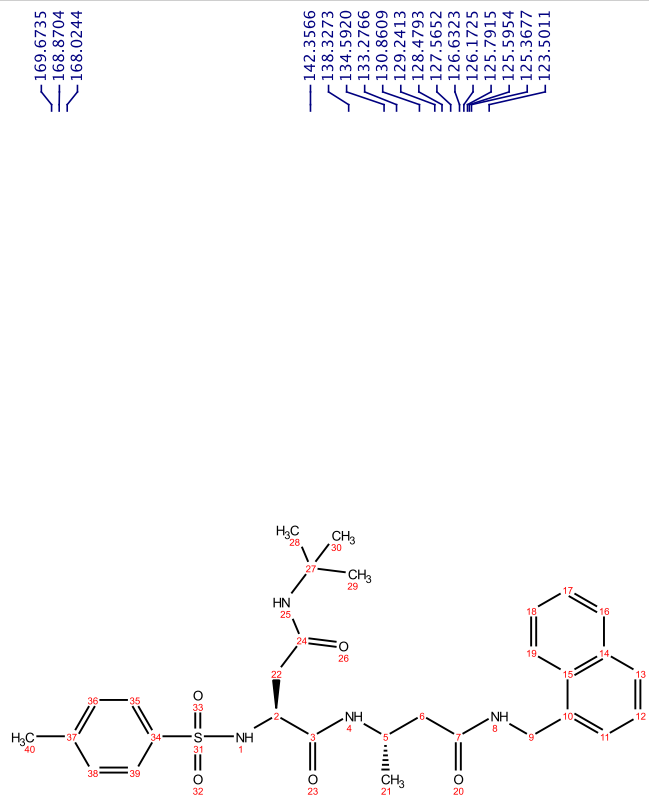

169.6735  
168.8704  
168.0244

142.3566  
138.3273  
134.5920  
133.2766  
130.8609  
129.2413  
128.4793  
127.5652  
126.6323  
126.1725  
125.7915  
125.5954  
125.3677  
123.5011

53.5952  
50.0653

42.1761  
41.5196  
40.4369

28.4029

20.9066  
19.4301

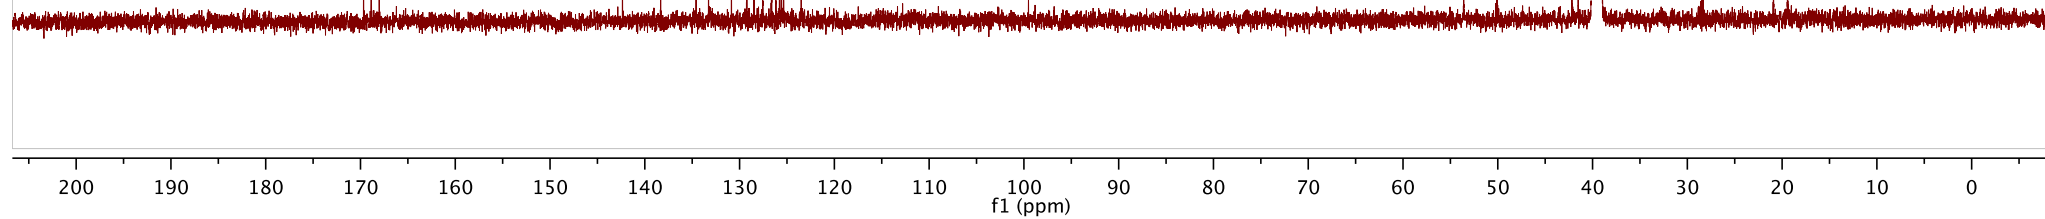

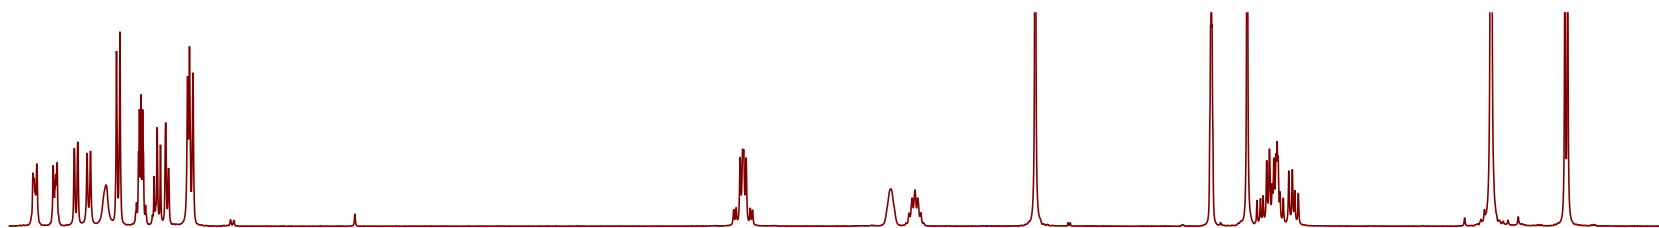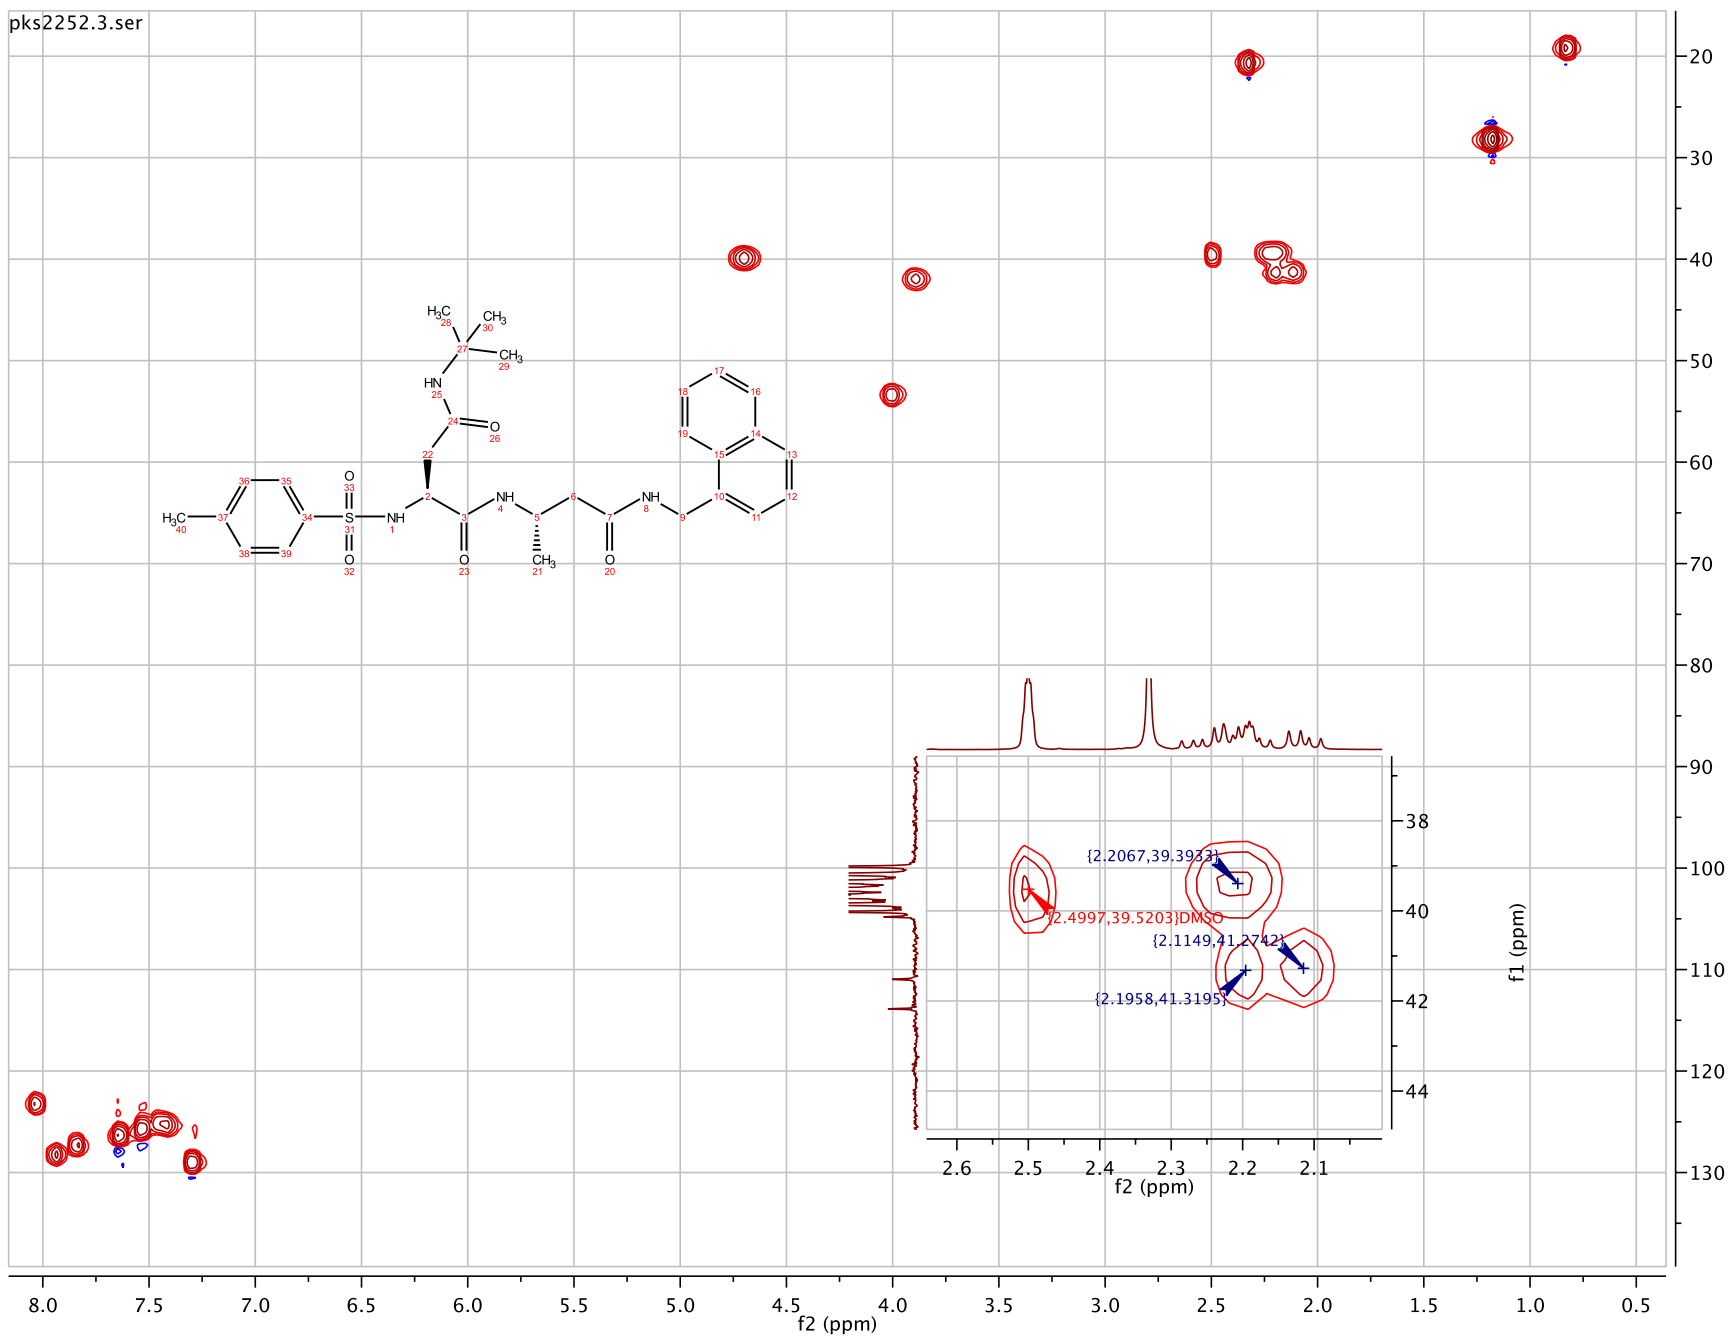

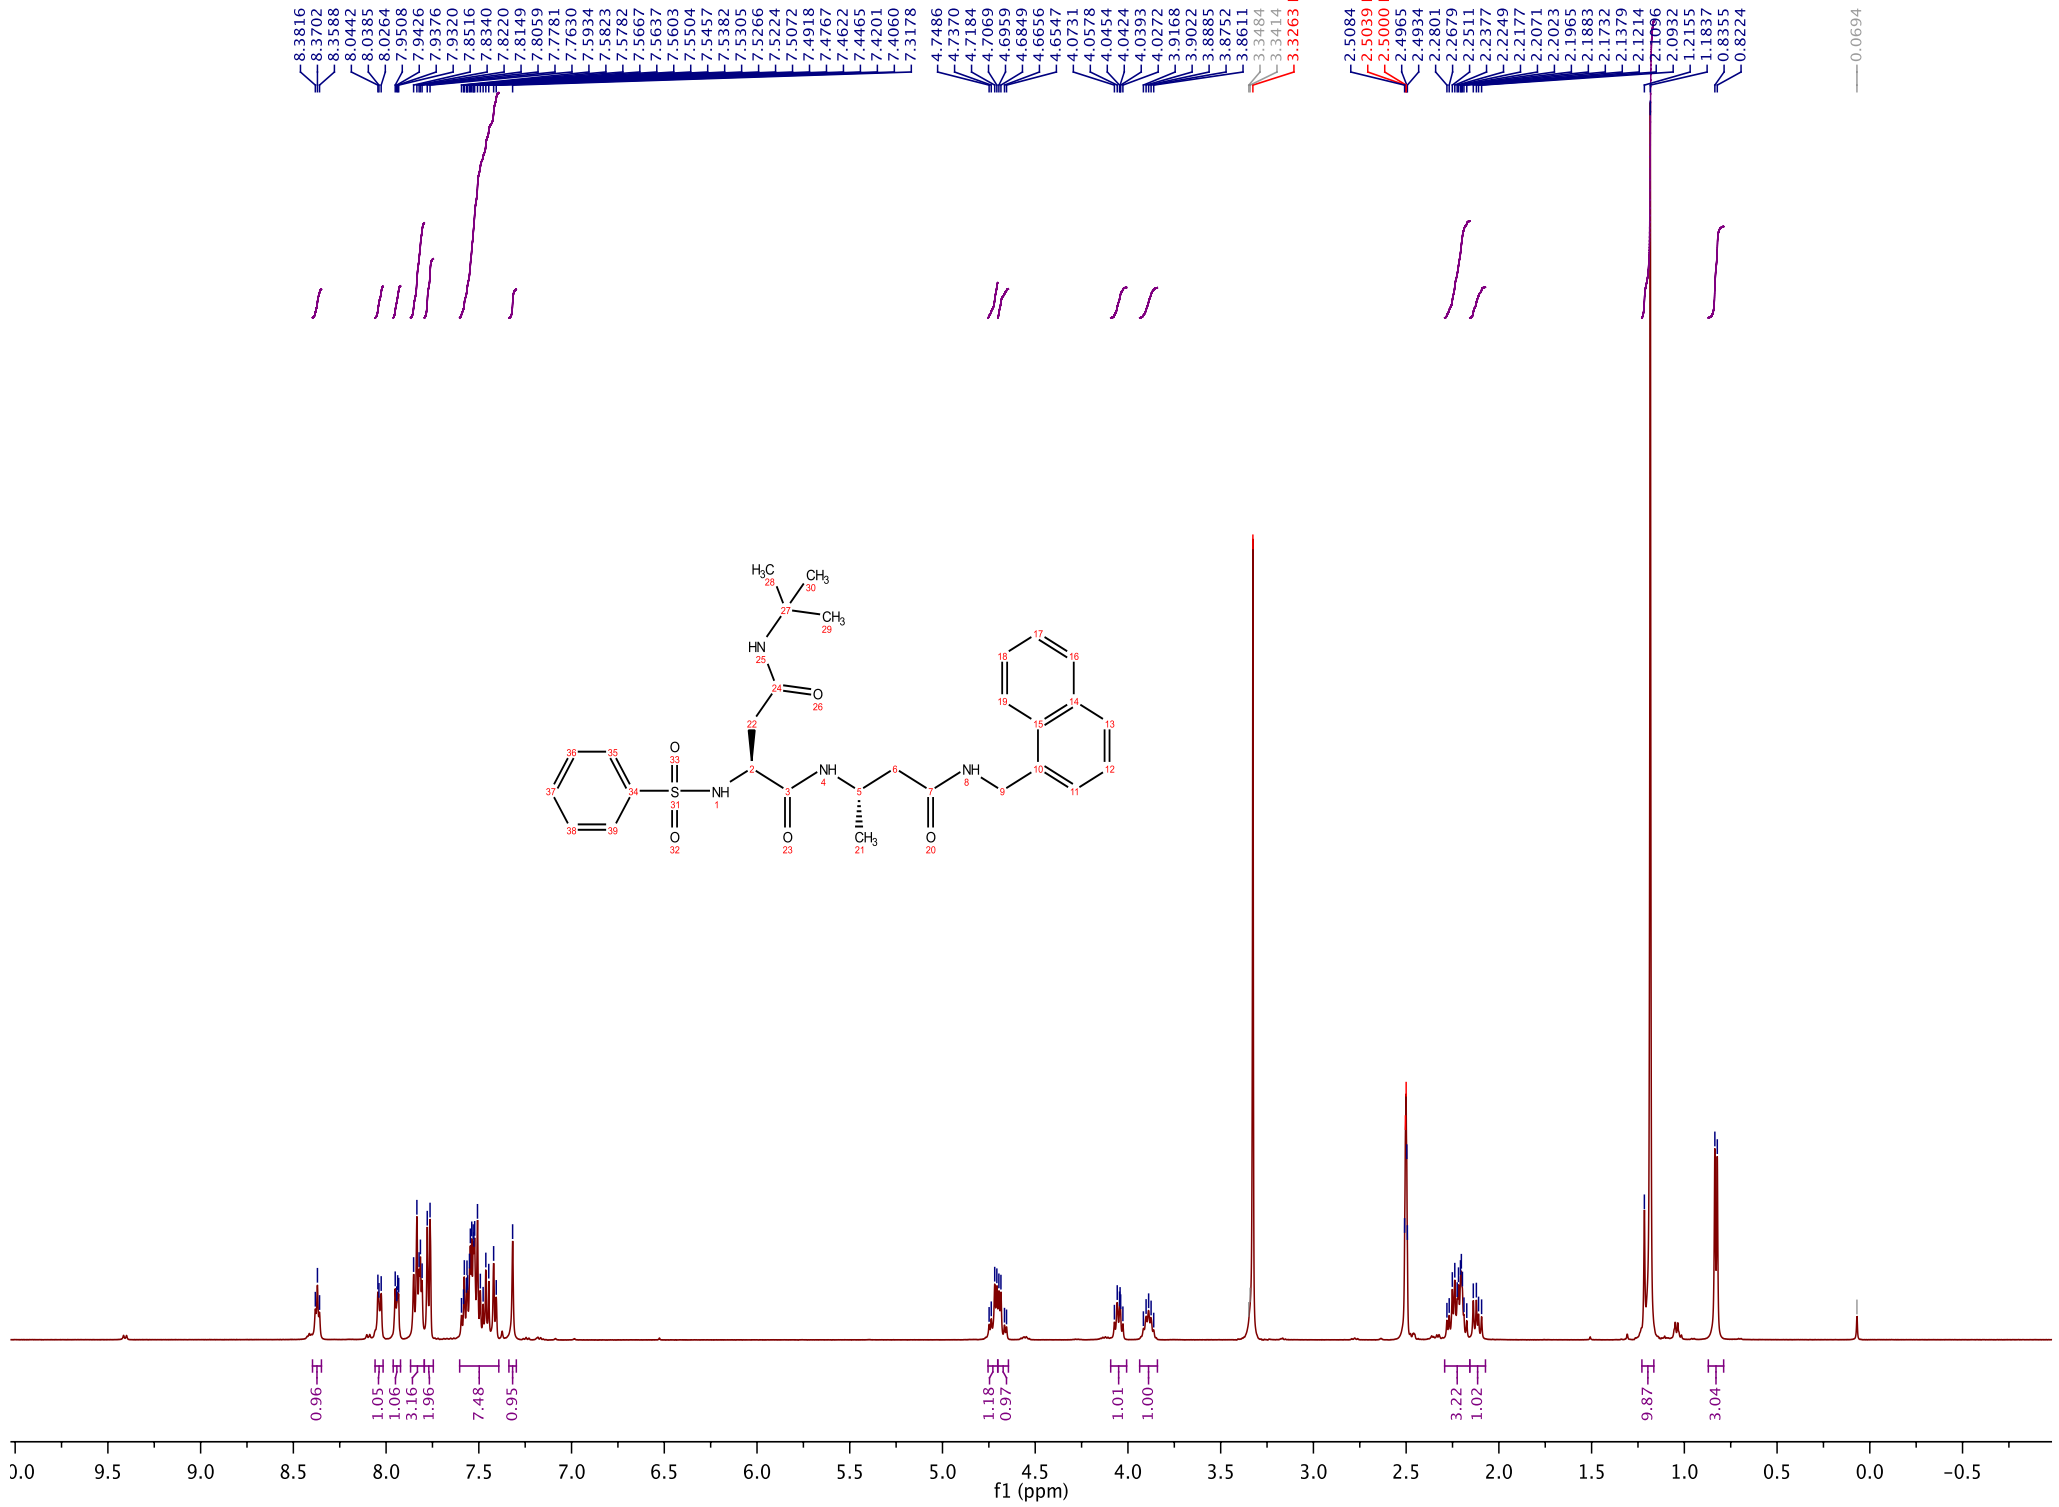



169.6684  
168.8530  
167.9768

141.2525  
134.5929  
133.2790  
132.1689  
130.8645  
128.8046  
128.4831  
127.5704  
126.5373  
126.1862  
125.8003  
125.5964  
125.3772  
123.4997

53.6156  
50.0666

42.1588  
41.5460  
40.4299

28.4155

19.4929

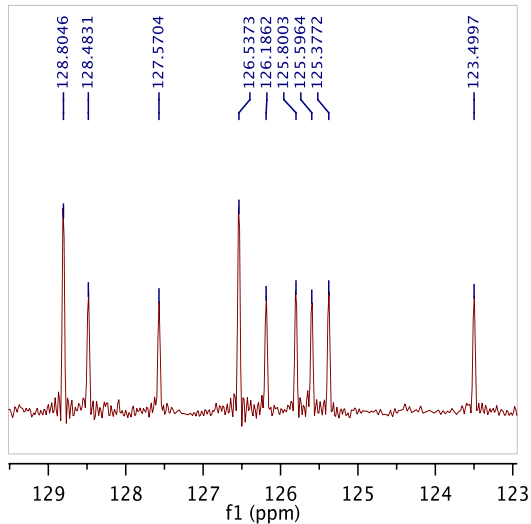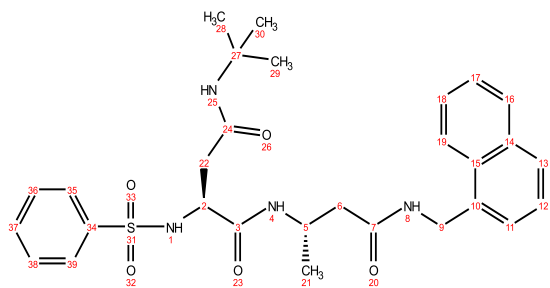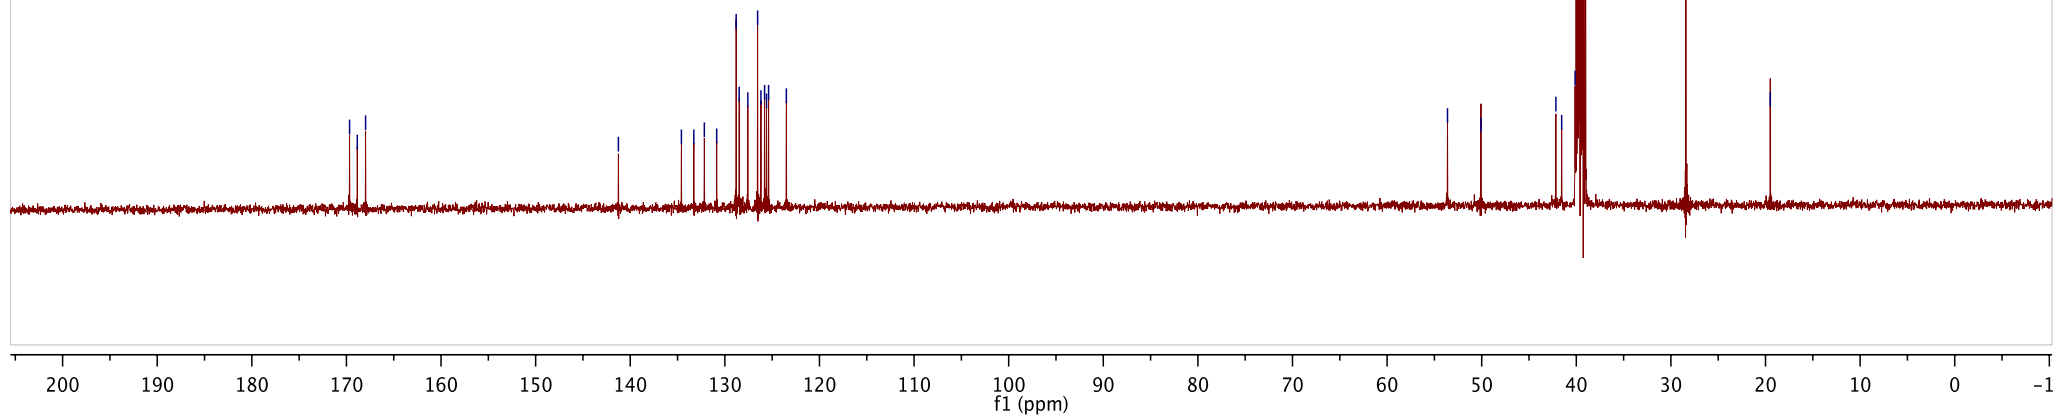

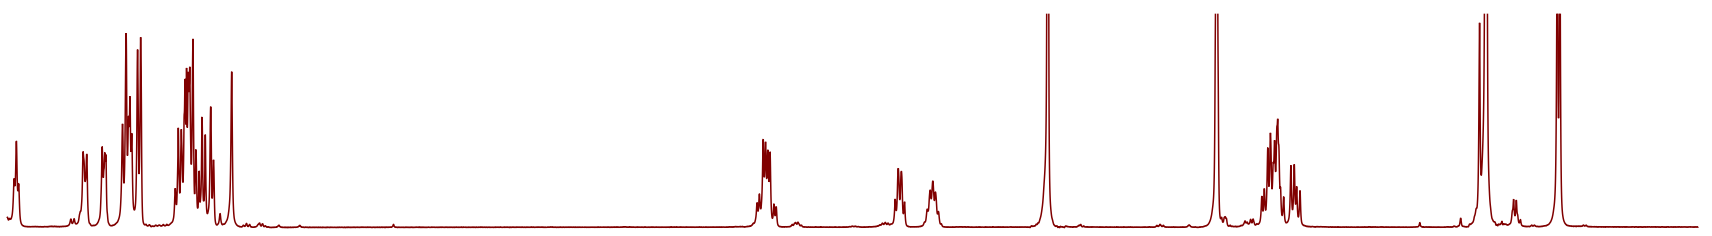

pks2260.3.ser

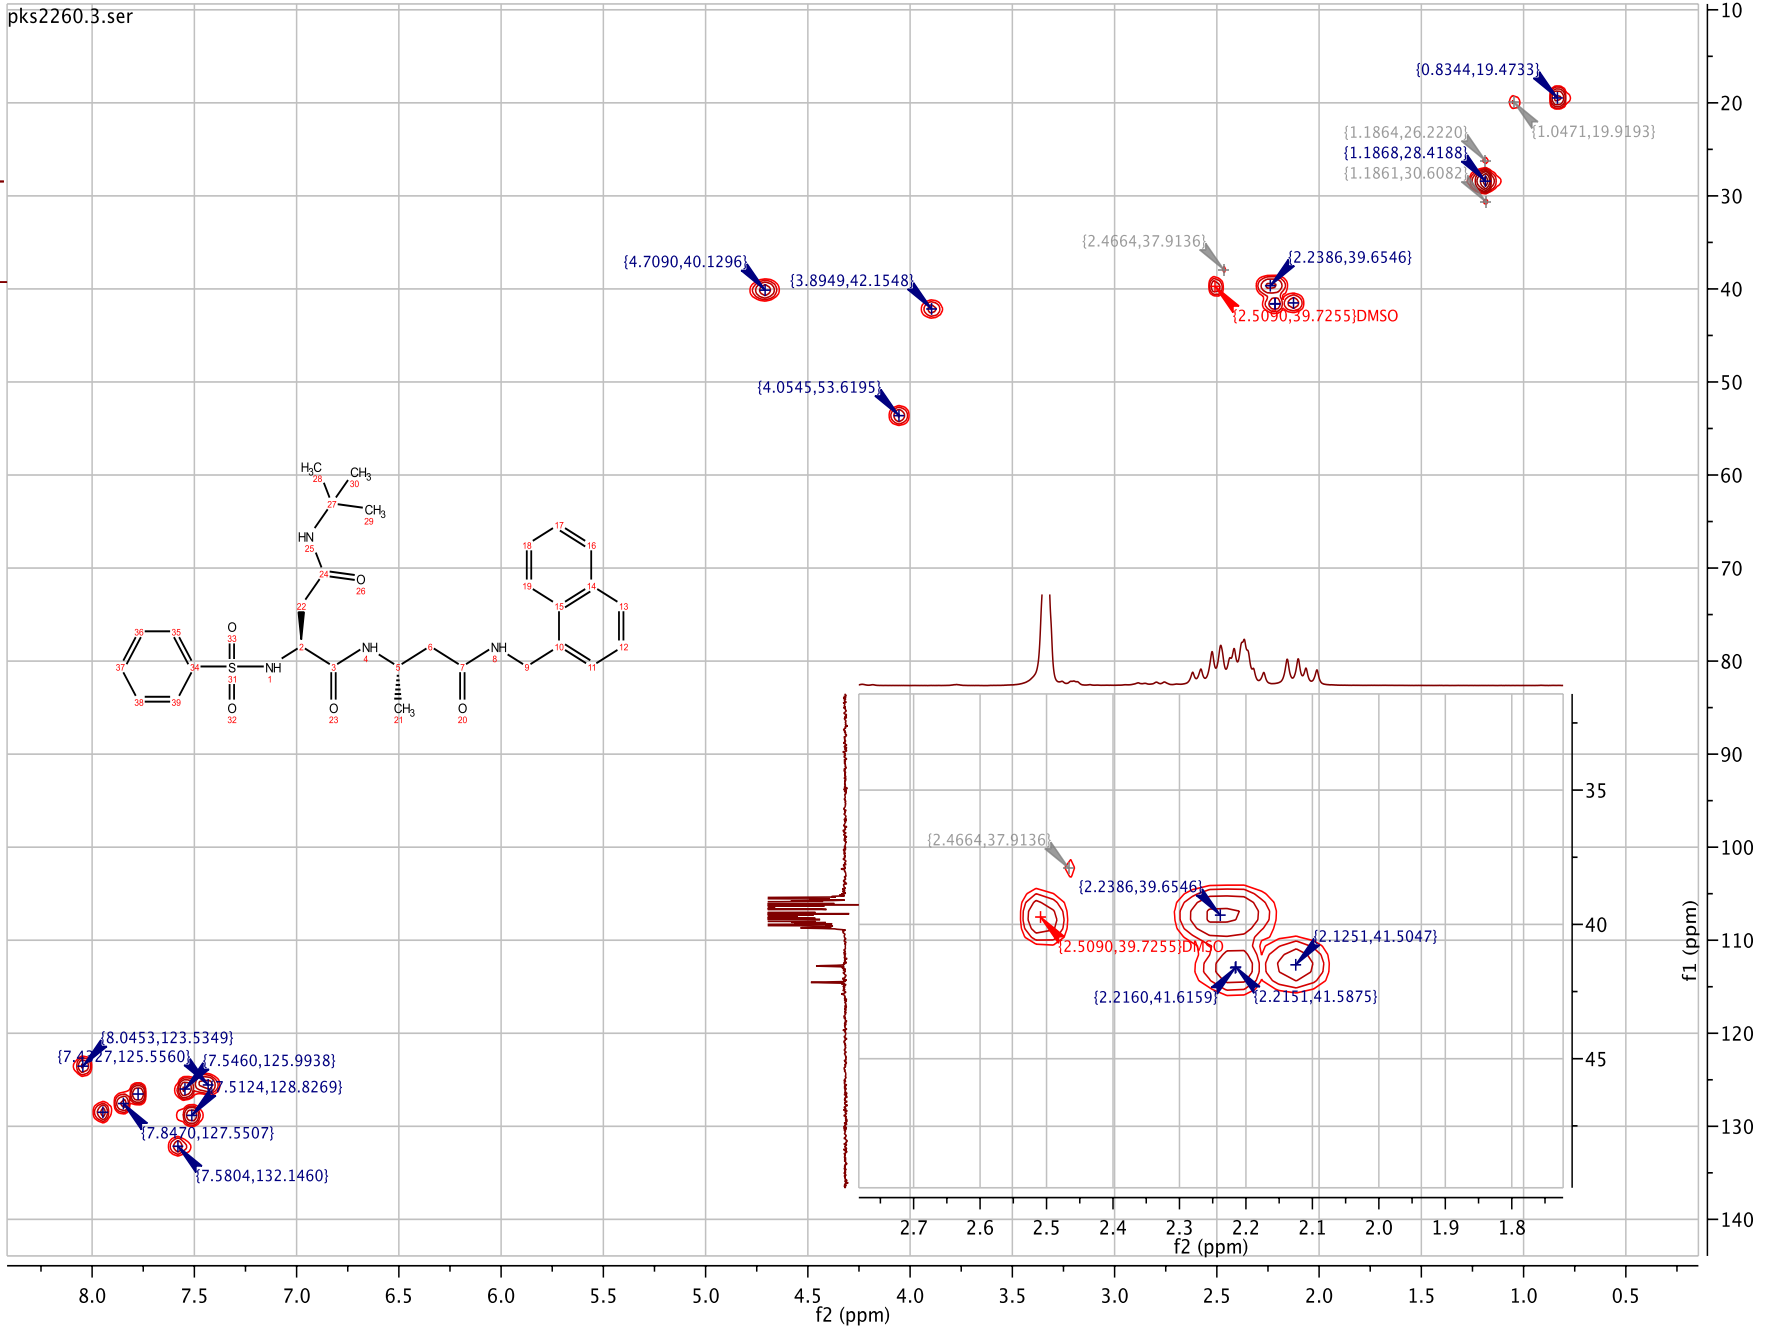

f1 (ppm)

f1 (ppm)

f2 (ppm)

f2 (ppm)

8.4391  
8.4277  
8.4162  
8.0595  
8.0460  
8.0409  
7.9539  
7.9487  
7.9405  
7.9357  
7.8563  
7.8403  
7.8287  
7.8125  
7.5651  
7.5550  
7.5513  
7.5480  
7.5419  
7.5344  
7.5297  
7.4835  
7.4690  
7.4536  
7.4403  
7.4266  
7.3409  
6.7655  
6.7489

4.7709  
4.7595  
4.7407  
4.7294  
4.7173  
4.7062  
4.6871  
4.6761  
4.1845  
4.1753  
4.1607  
4.1491  
4.1428  
4.1328  
4.1250  
4.1117  
4.0970  
4.0831  
4.0699  
4.0476  
3.3178  
2.5078 DMSO  
2.5042 DMSO  
2.5006 DMSO  
2.4971 DMSO  
2.4934 DMSO  
2.3619  
2.3510  
2.3340  
2.3224  
2.3106  
2.3071  
2.2895  
2.2773  
2.2566  
2.2407  
2.2276  
2.2126

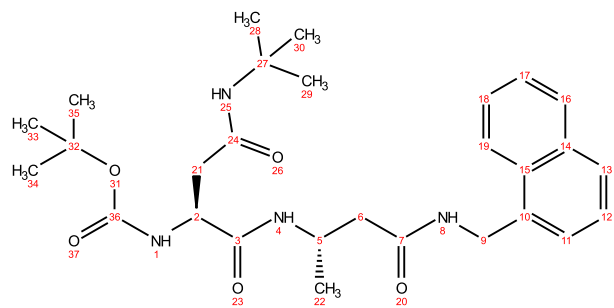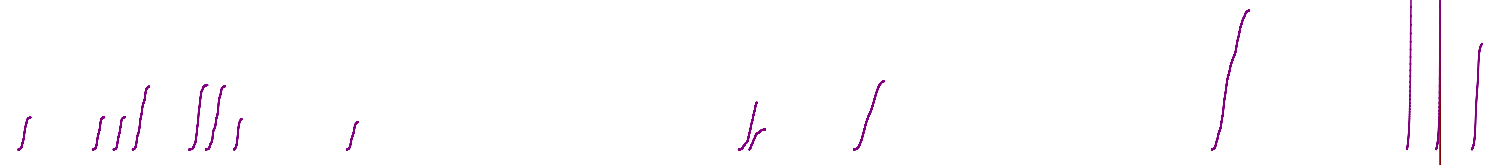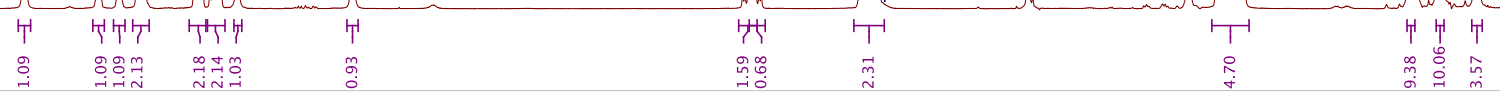

10.0 9.5 9.0 8.5 8.0 7.5 7.0 6.5 6.0 5.5 5.0 4.5 4.0 3.5 3.0 2.5 2.0 1.5 1.0 0.5

f1 (ppm)

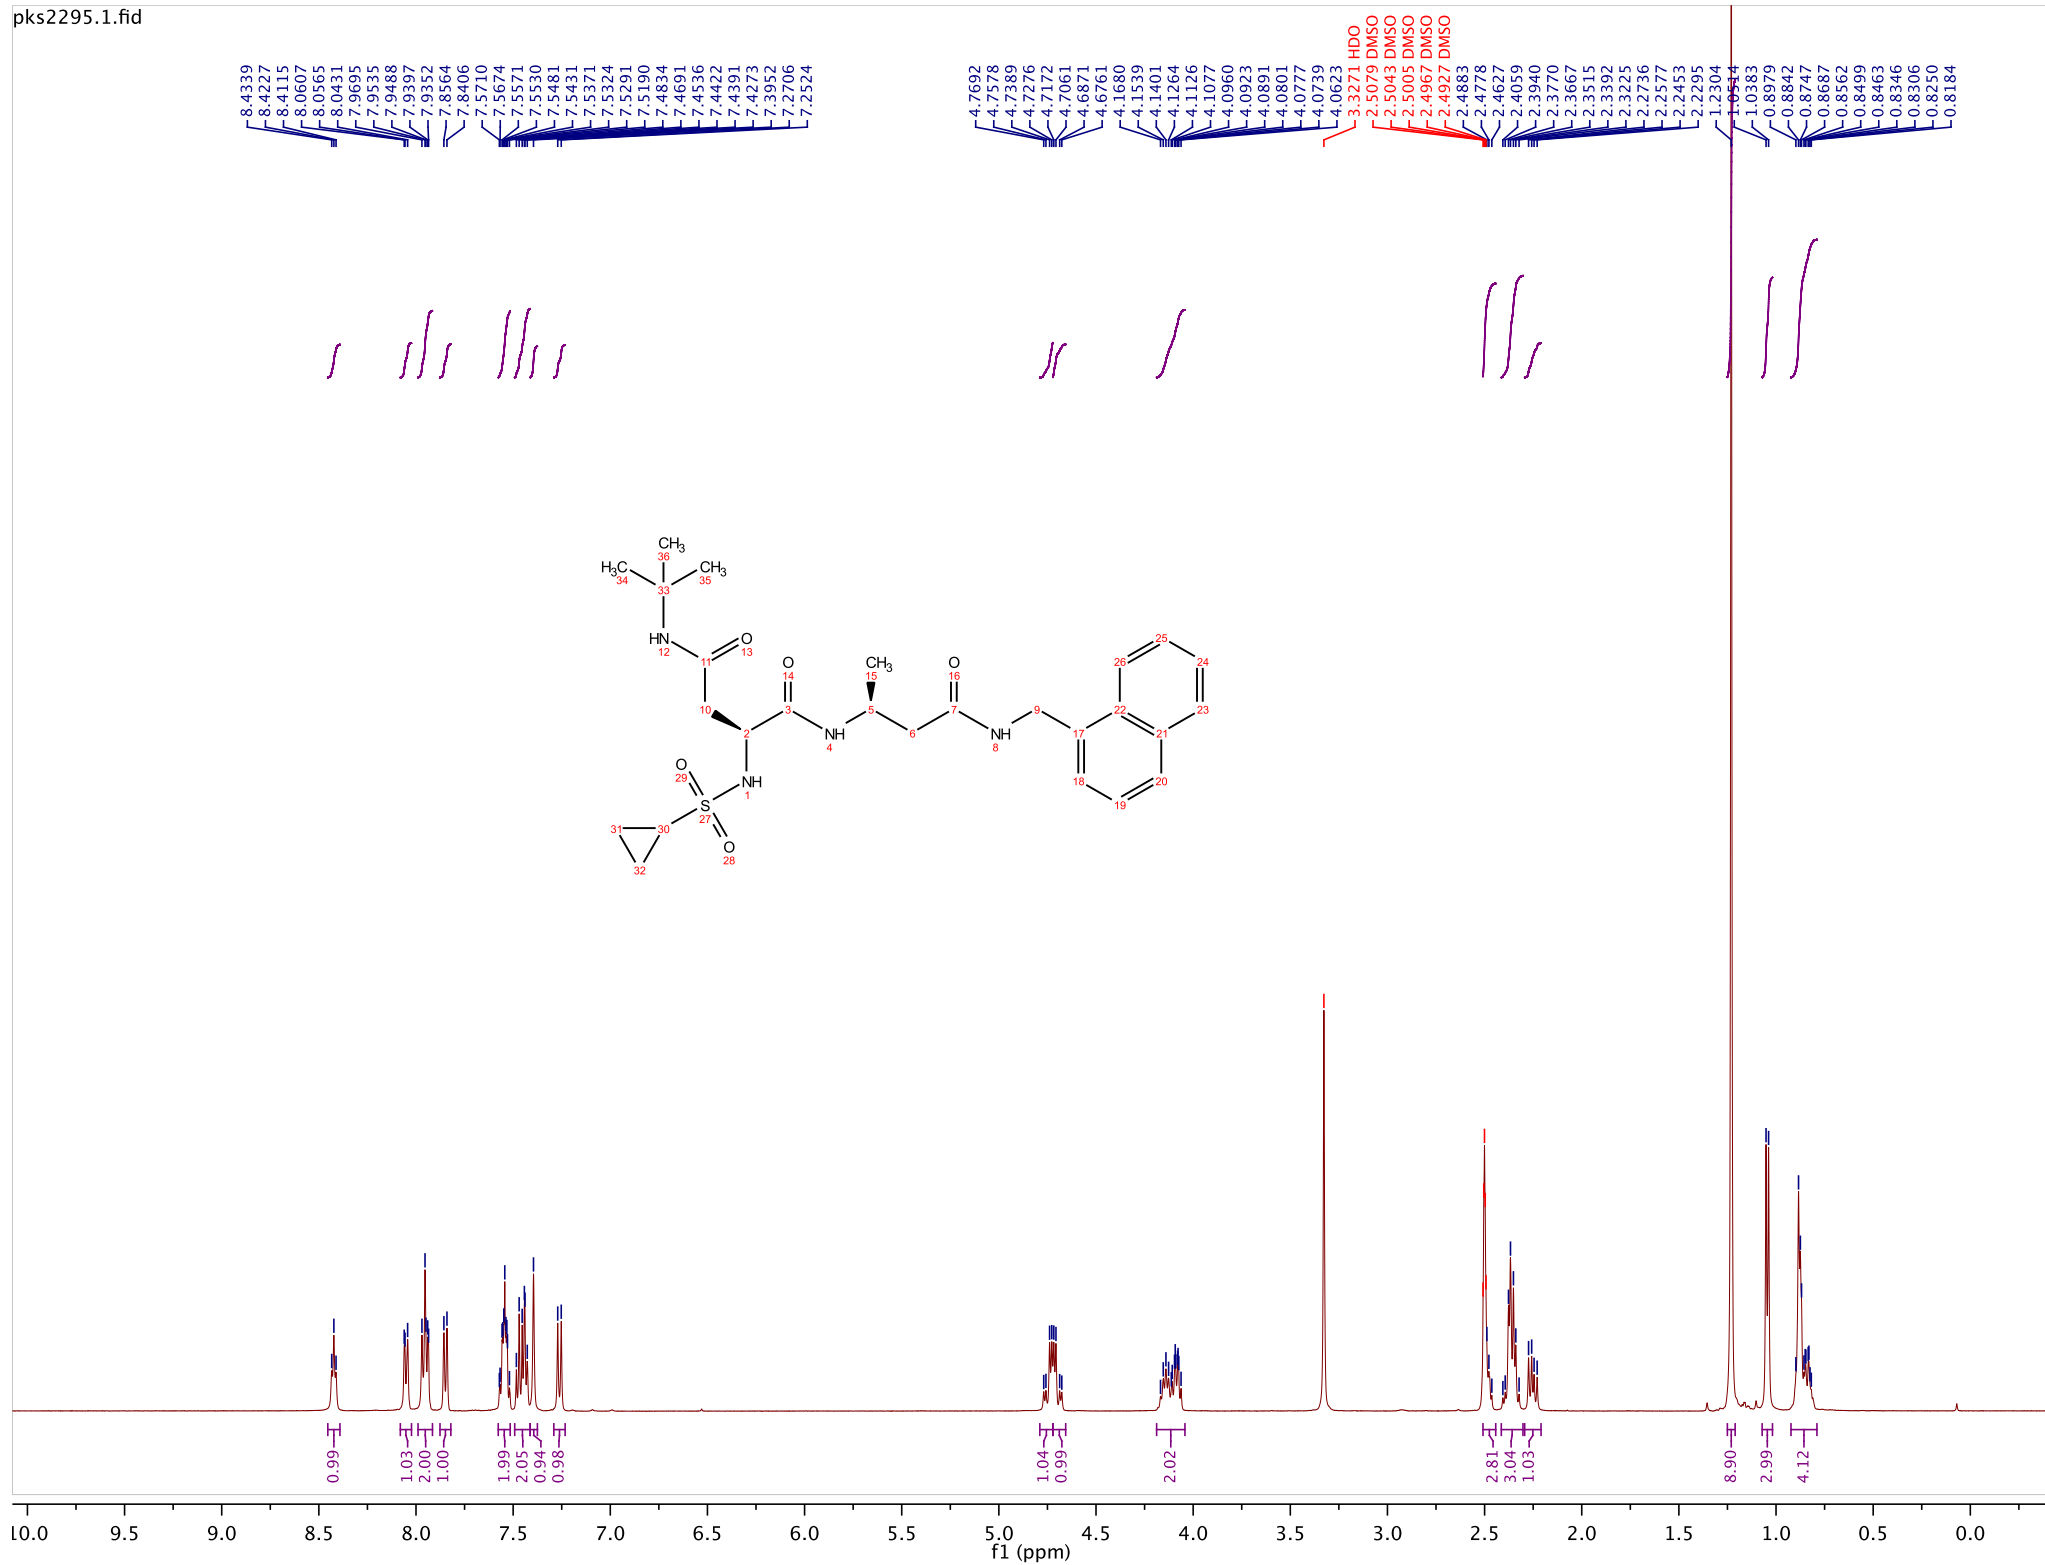

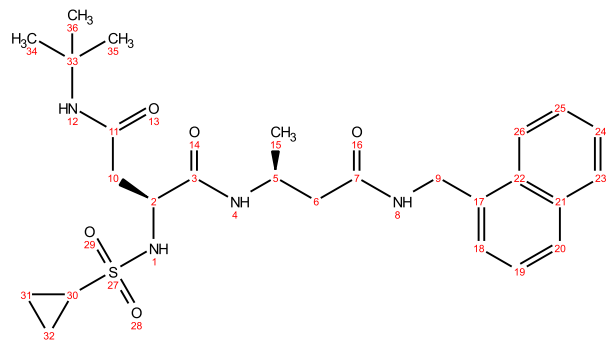

169.9258  
169.7547  
168.3680

134.5736  
133.2794  
130.8680  
128.4803  
127.5792  
126.1942  
125.7998  
125.6198  
125.3797  
123.5109

53.7129  
50.1207  
47.4078  
41.5894  
40.1520  
40.0198 DMSO  
39.9575 DMSO  
39.8528 DMSO  
39.6863 DMSO  
39.5199 DMSO  
39.3533 DMSO  
39.1853 DMSO  
39.0201 DMSO

30.2808  
28.4455

19.8025

5.1289  
4.8389

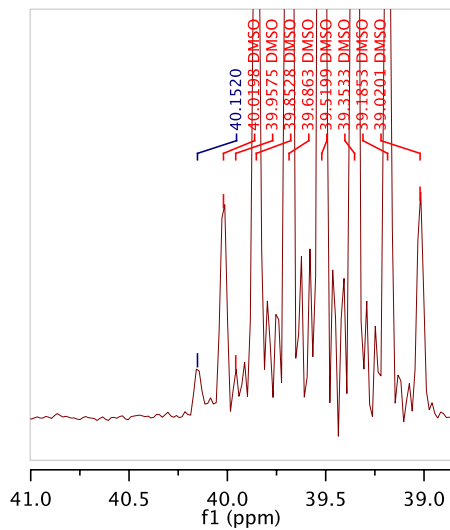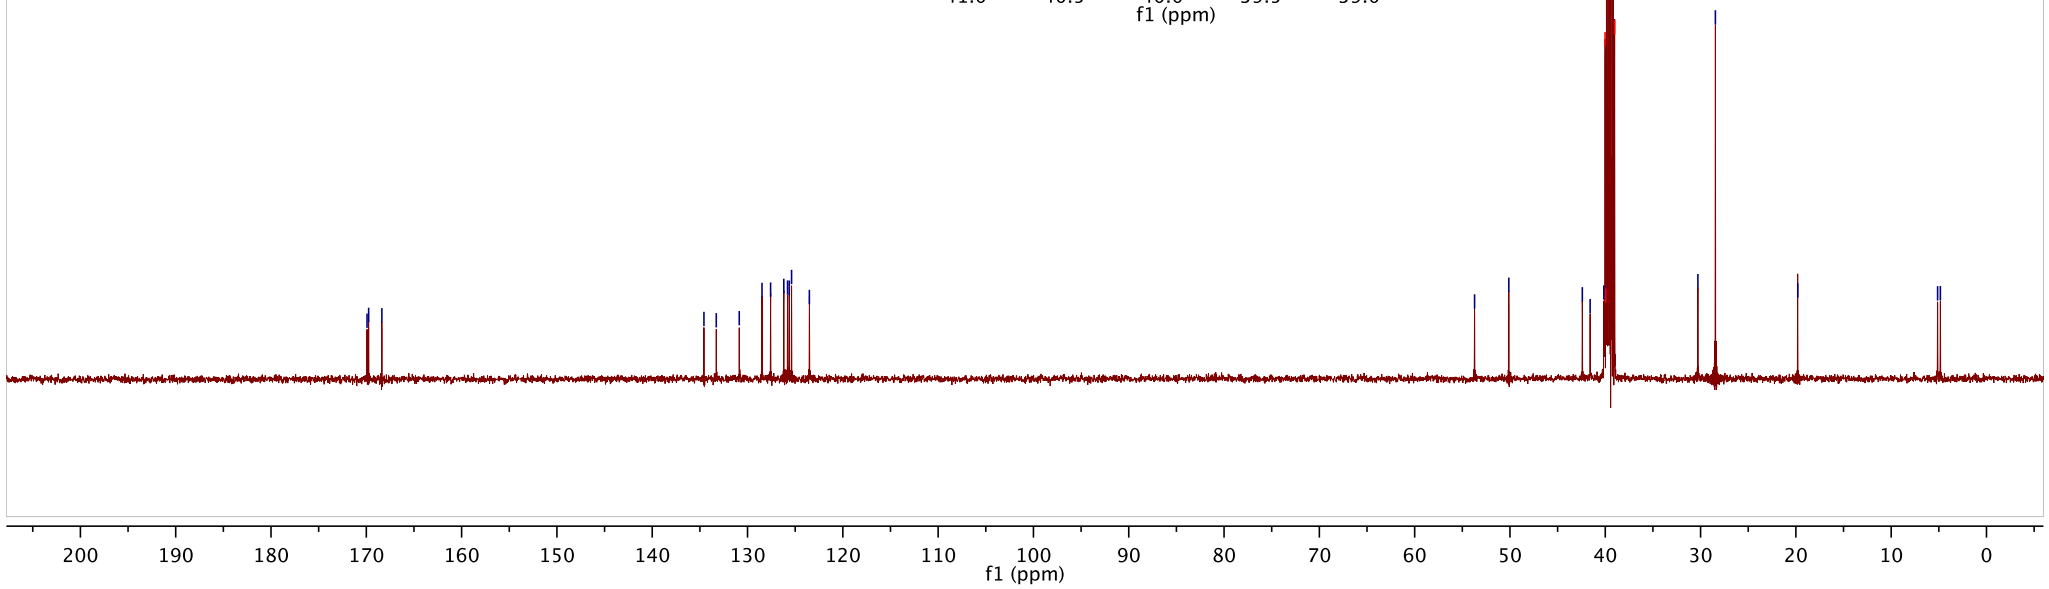

pks2295/4

128.4806  
127.5787  
126.1958  
125.8011  
125.6188  
125.3807  
123.5041

53.7113

42.4050  
41.5884  
40.1492  
39.8191

30.2774  
28.4446

19.8095

5.1286  
4.8392

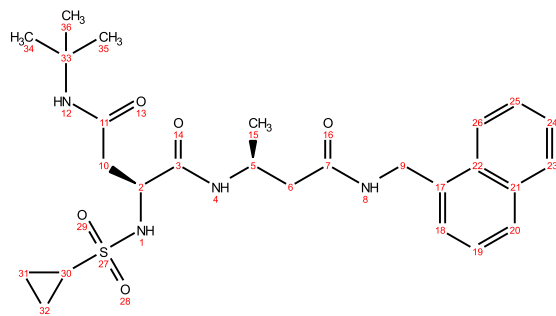

160 150 140 130 120 110 100 90 80 70 60 50 40 30 20 10 0 -10

f1 (ppm)

1000  
900  
800  
700  
600  
500  
400  
300  
200  
100  
0  
-100  
-200  
-300  
-400  
-500

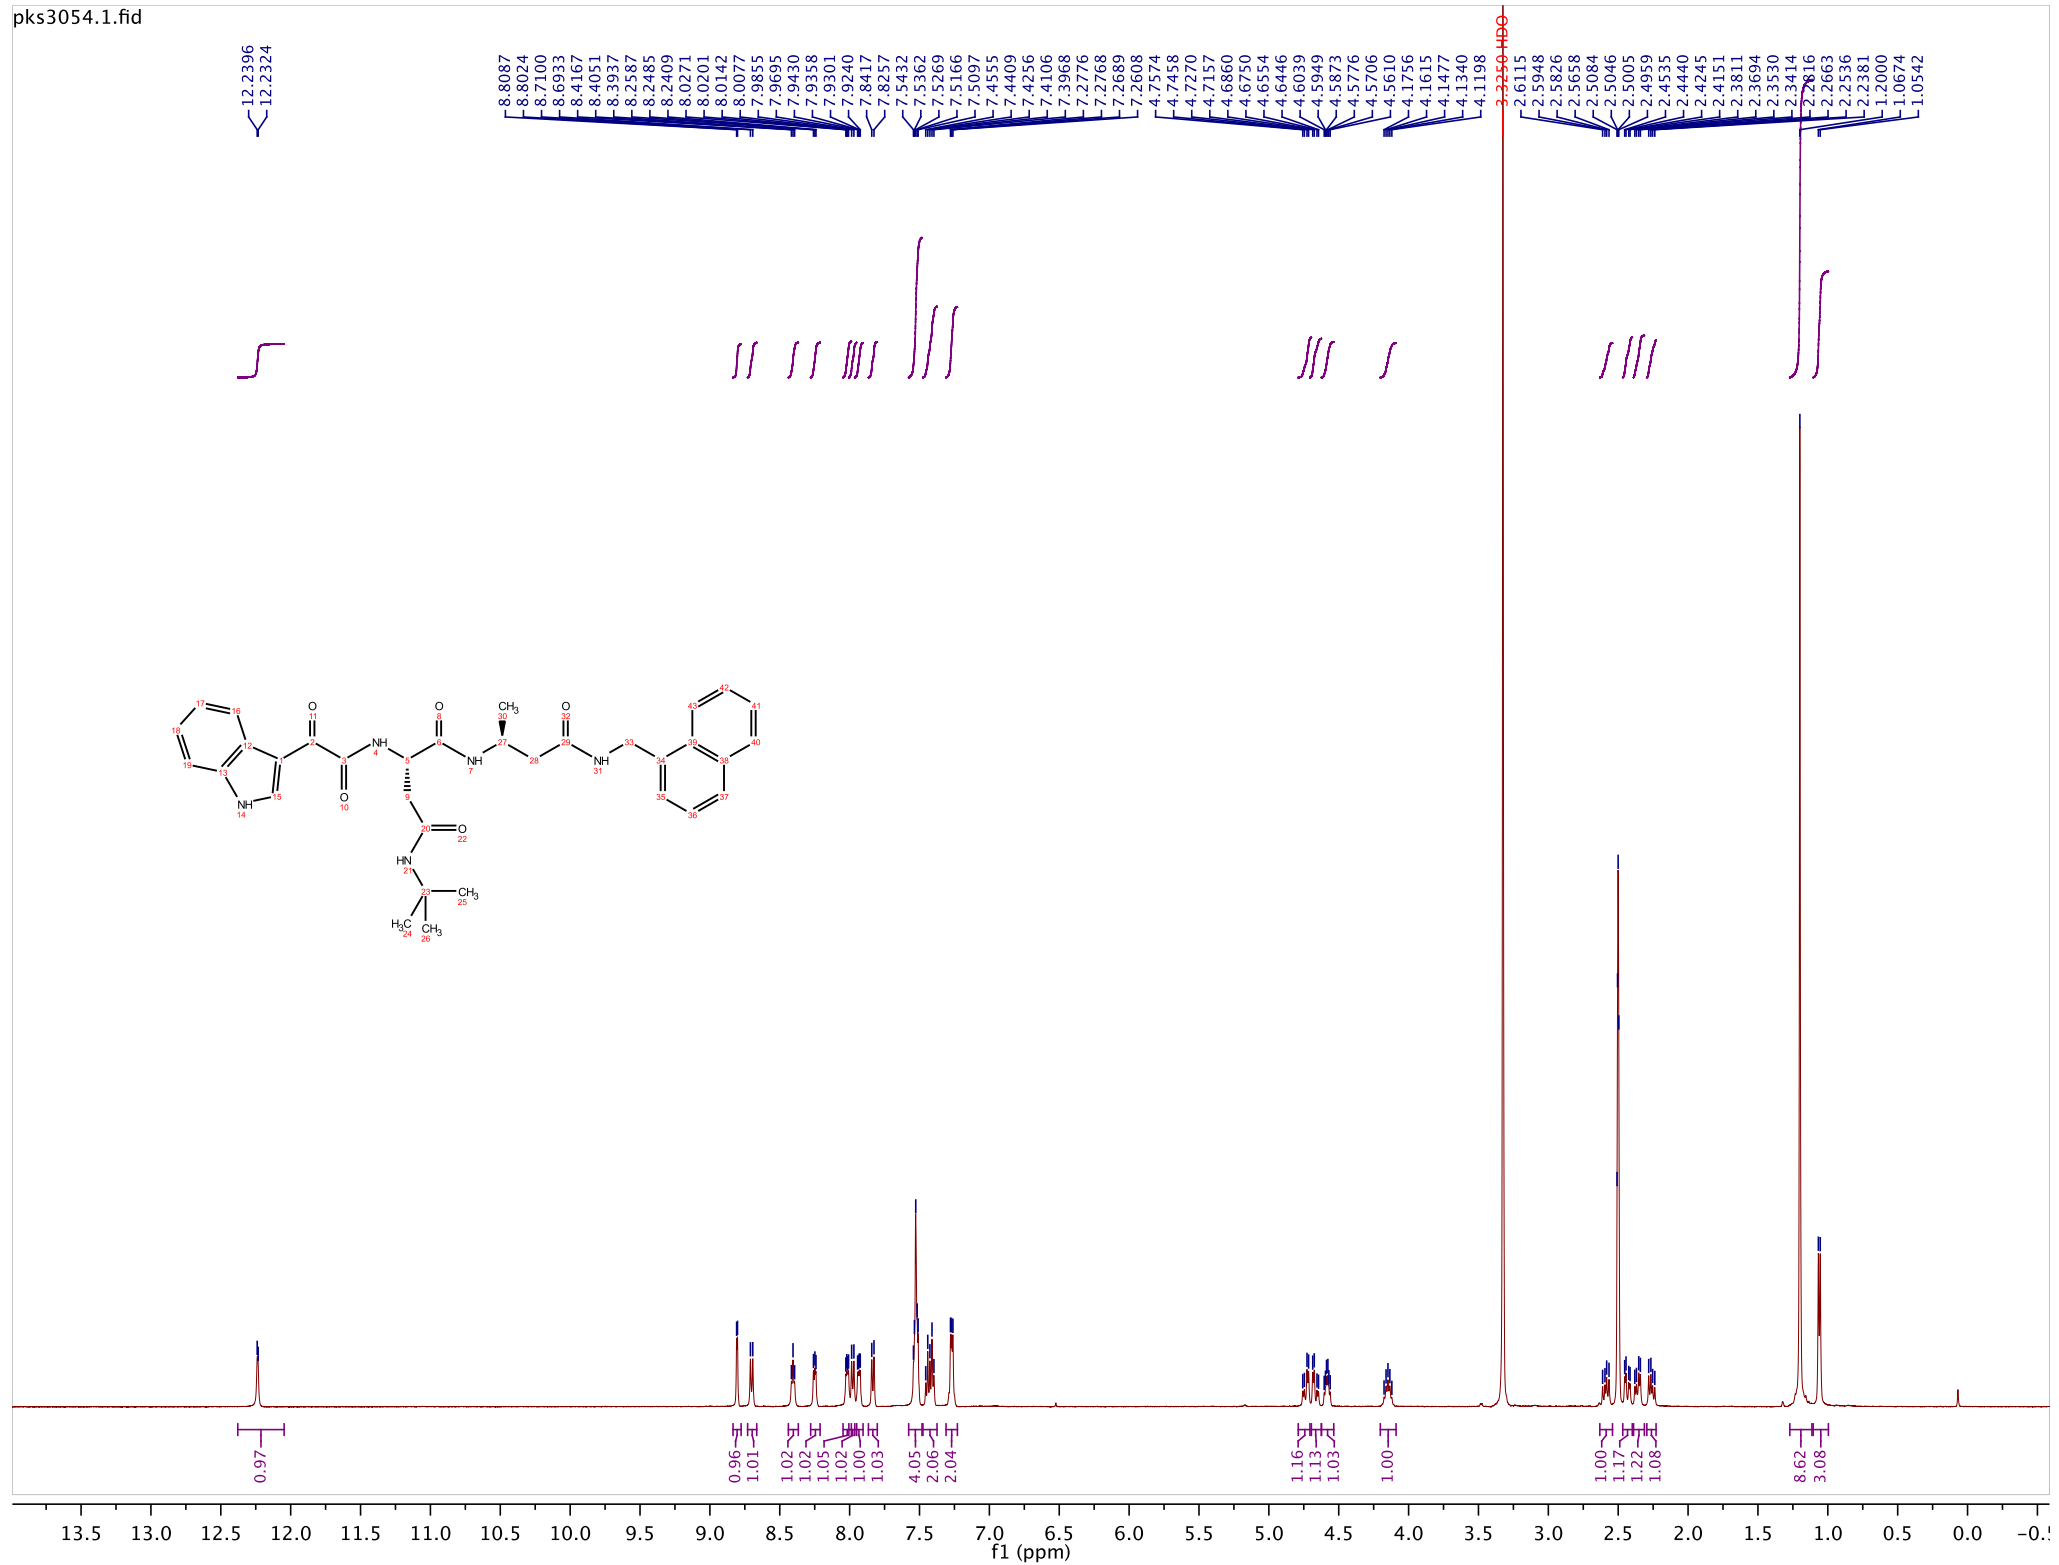

8.4397  
8.4281  
8.4163  
8.0739  
8.0593  
8.0221  
8.0136  
8.0035  
7.9458  
7.9355  
7.9318  
7.9268  
7.8338  
7.8181  
7.6865  
7.6703  
7.5384  
7.5340  
7.5288  
7.5232  
7.5191  
7.4484  
7.4338  
7.4182  
7.4062  
7.3925  
7.3693  
7.2446  
7.2335  
7.2292  
7.2148  
7.1641  
7.1487  
7.1450  
7.1322

4.7203  
4.7089  
4.3342  
4.3272  
4.3199  
4.3129  
4.3054  
4.2986  
4.2908

3.3275 H<sub>2</sub>O

2.7640  
2.7490  
2.7443  
2.7320  
2.5086 DMSO  
2.5047 DMSO  
2.5009 DMSO  
2.4973 DMSO  
2.4937

2.3723  
2.3583  
2.3436  
2.3292  
2.3187  
2.3060  
2.2876  
2.2823  
2.2674  
2.2525  
2.2387  
2.2245  
2.2106  
2.1987  
2.1855  
2.1706  
2.1574  
2.1274  
1.2217

0.0697

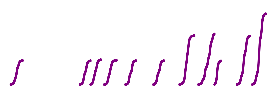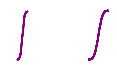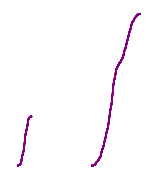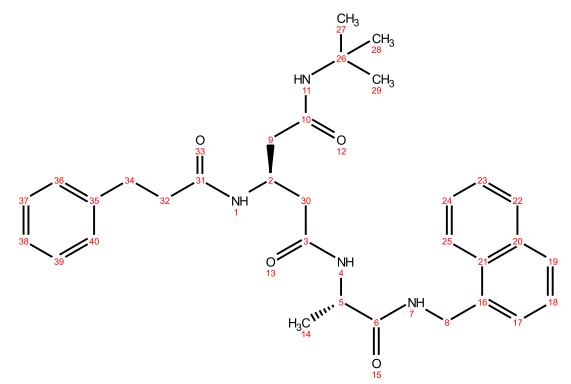

0.97  
0.97  
1.01  
0.98  
0.97  
0.97  
1.98  
2.05  
1.96  
2.86

1.93  
1.98

1.99  
6.12

12.01

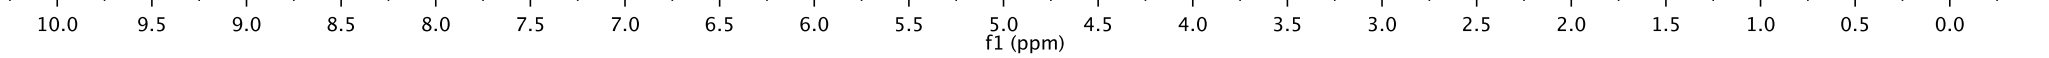



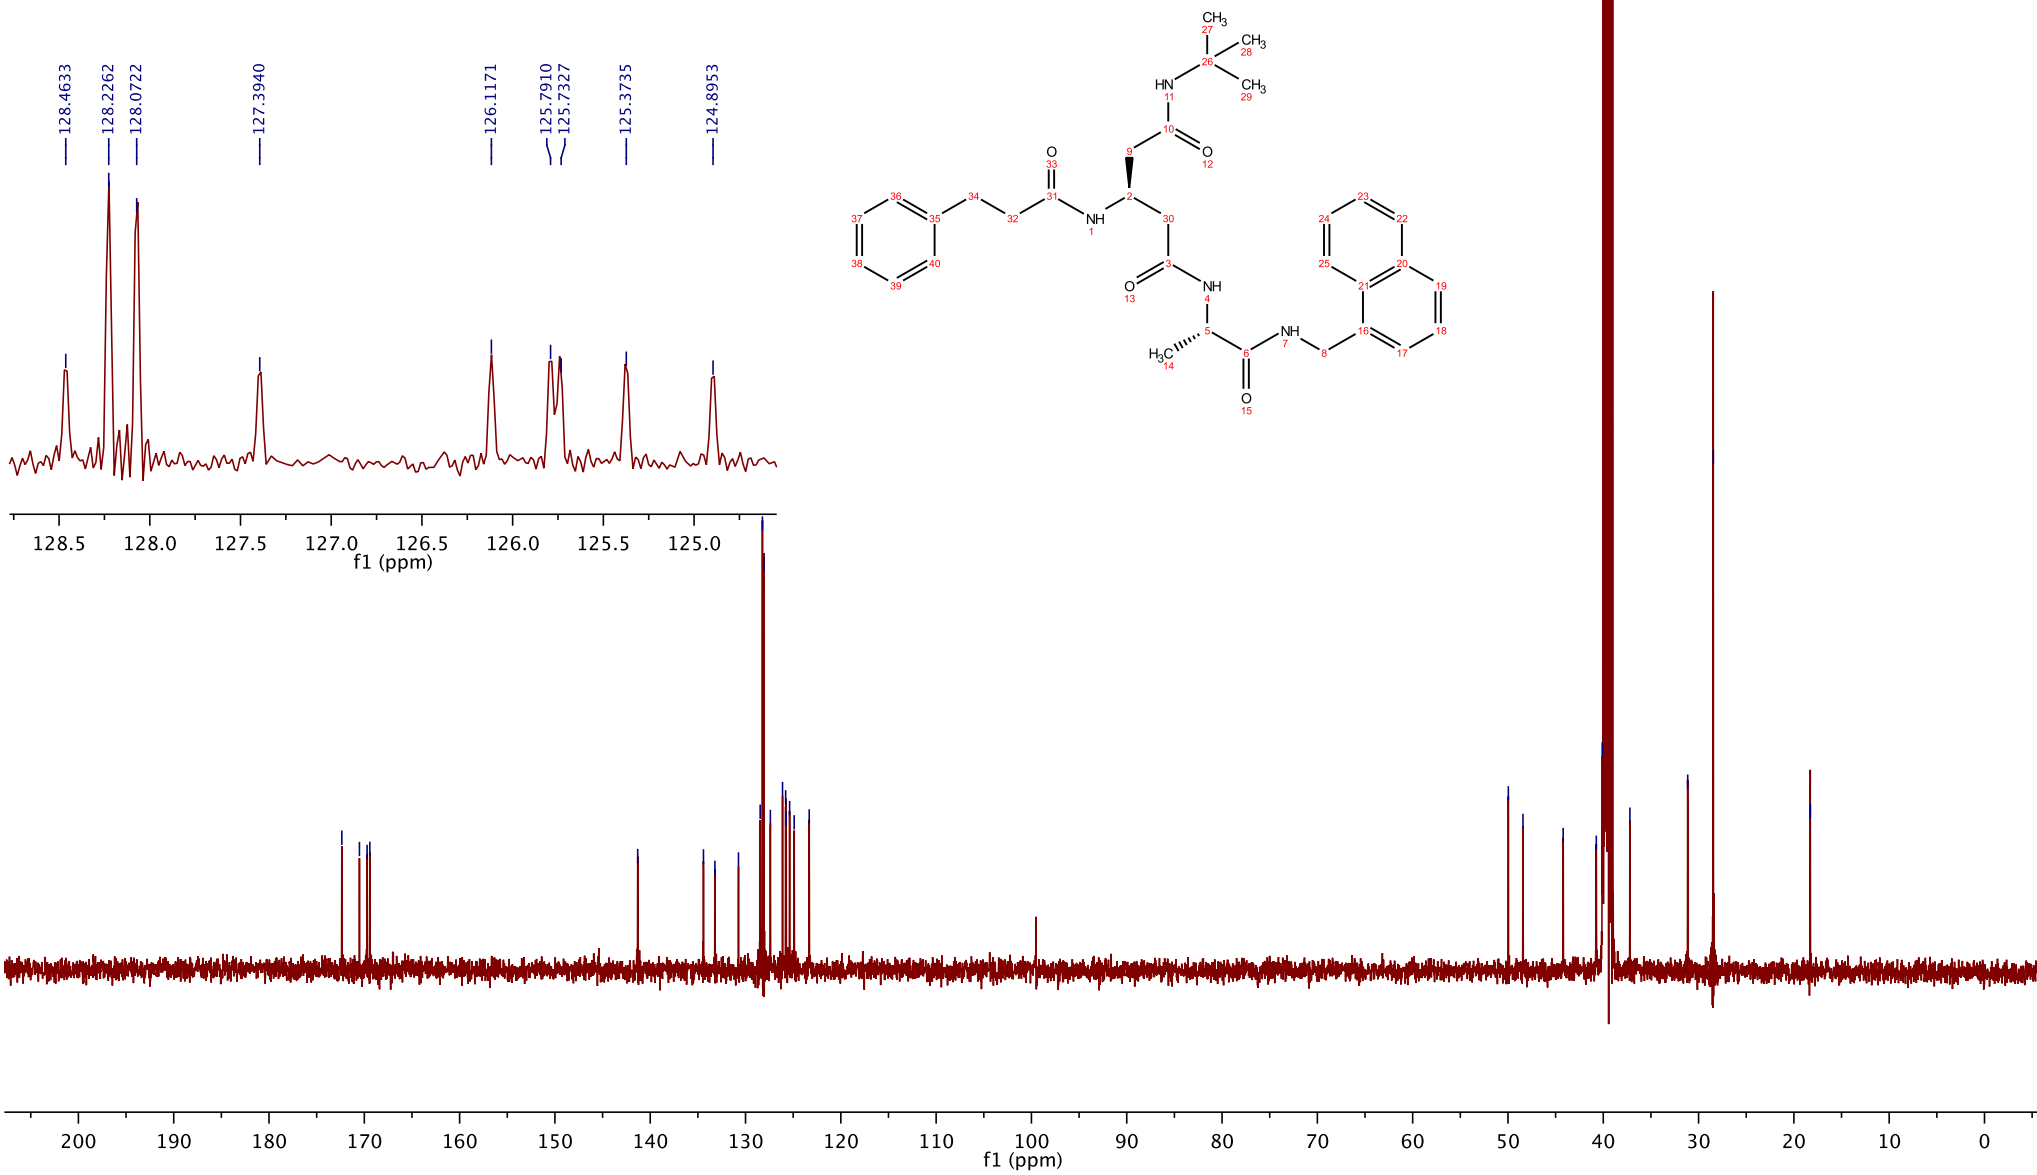

pks2278ii.4.ser

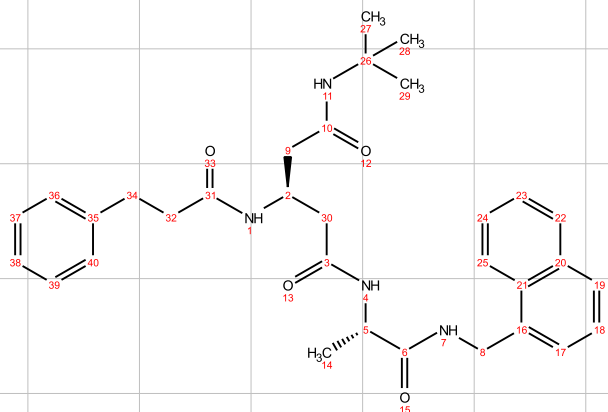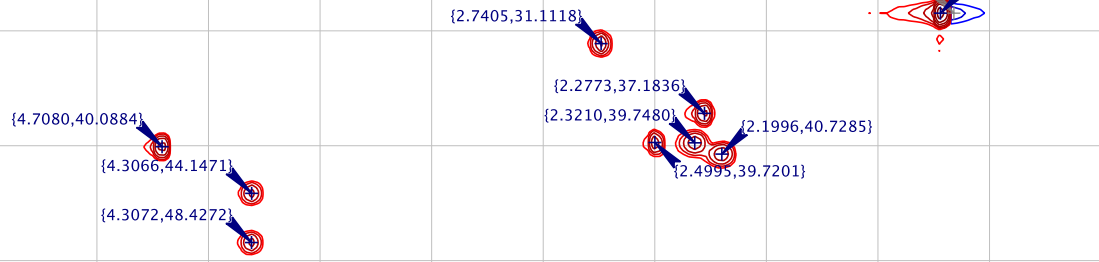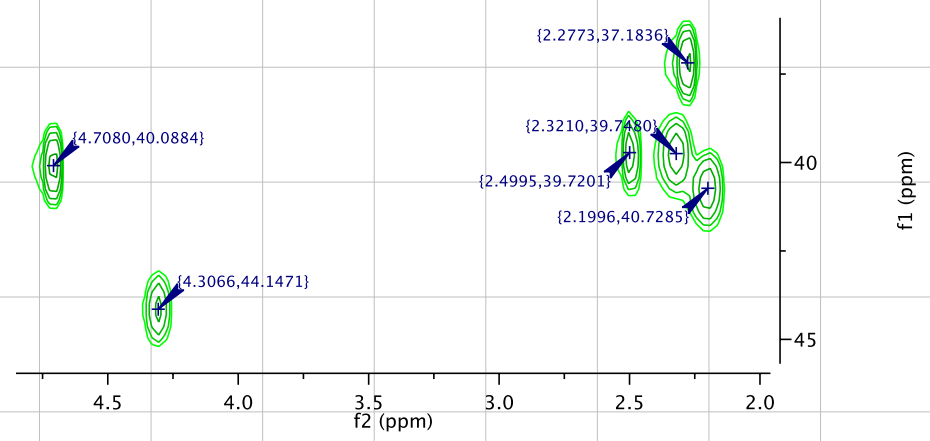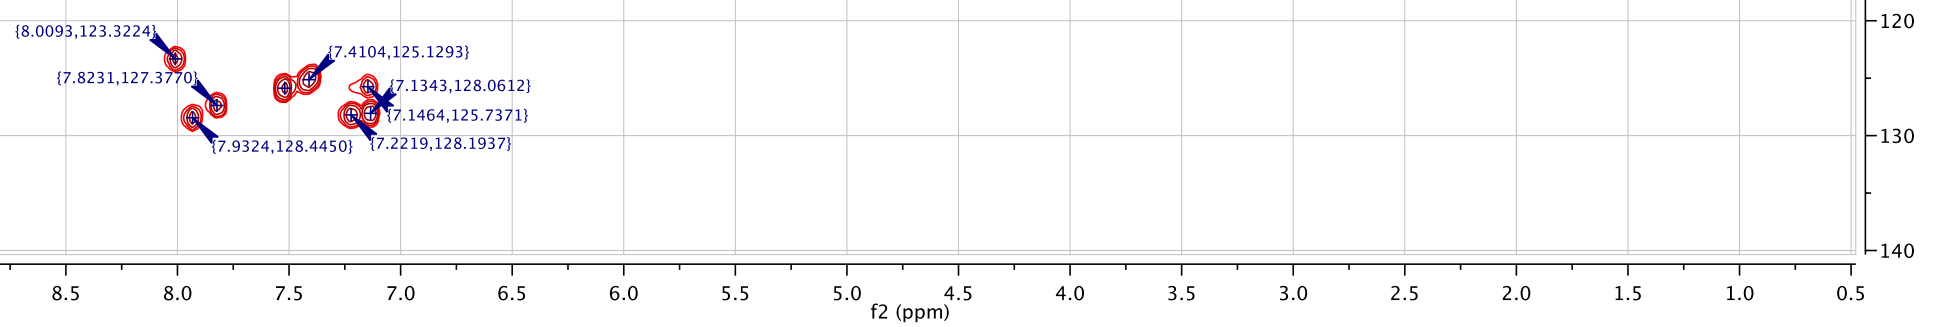

8.4276  
8.4161  
8.4045  
8.0782  
8.0634  
8.0522  
8.0454  
8.0430  
8.0364  
8.0327  
7.9548  
7.9448  
7.9409  
7.9357  
7.8523  
7.8366  
7.6682  
7.6514  
7.5463  
7.5415  
7.5379  
7.5351  
7.5316  
7.5272  
7.4829  
7.4766  
7.4674  
7.4621  
7.4525  
7.4466  
7.4401  
7.4369  
7.4260  
7.4226  
7.3885  
7.3297  
7.3137

4.7768  
4.7656  
4.7445  
4.7352  
4.7312  
4.7114  
4.7002  
4.2826  
4.2684  
4.2542  
4.2399  
4.2255

3.8054  
3.7921  
3.7785  
3.7649  
3.7514  
3.7378  
3.5253 H<sub>2</sub>O

2.5074  
2.5034  
2.4997  
2.4962  
2.4928  
2.3480  
2.2862  
2.2746  
2.2581  
2.2469  
2.2343  
2.2186  
2.2049  
2.1590  
2.1259

1.1988  
1.1837

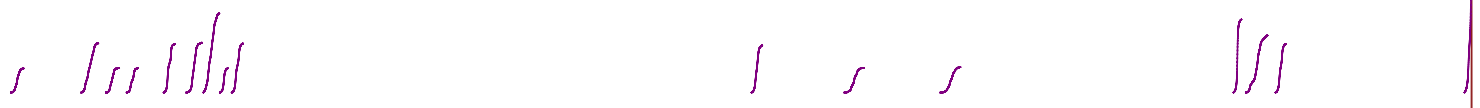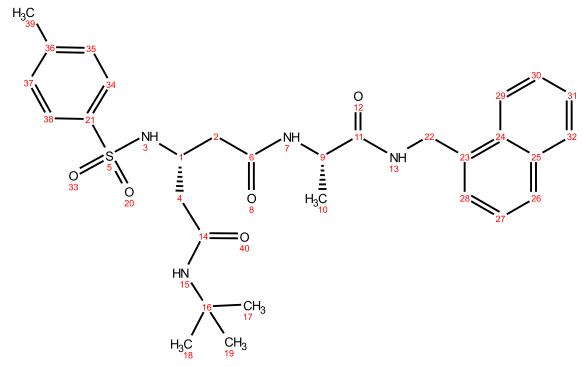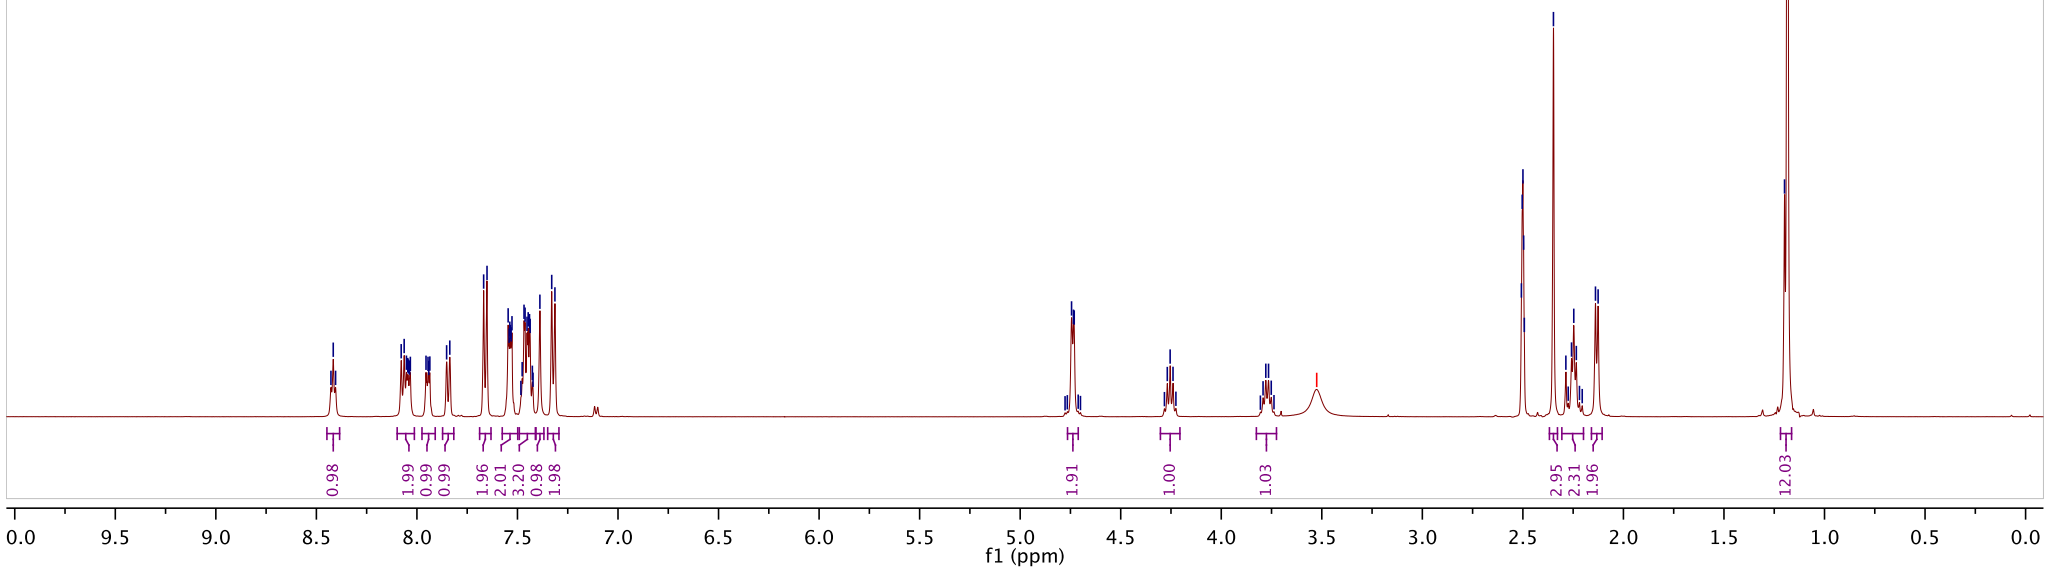

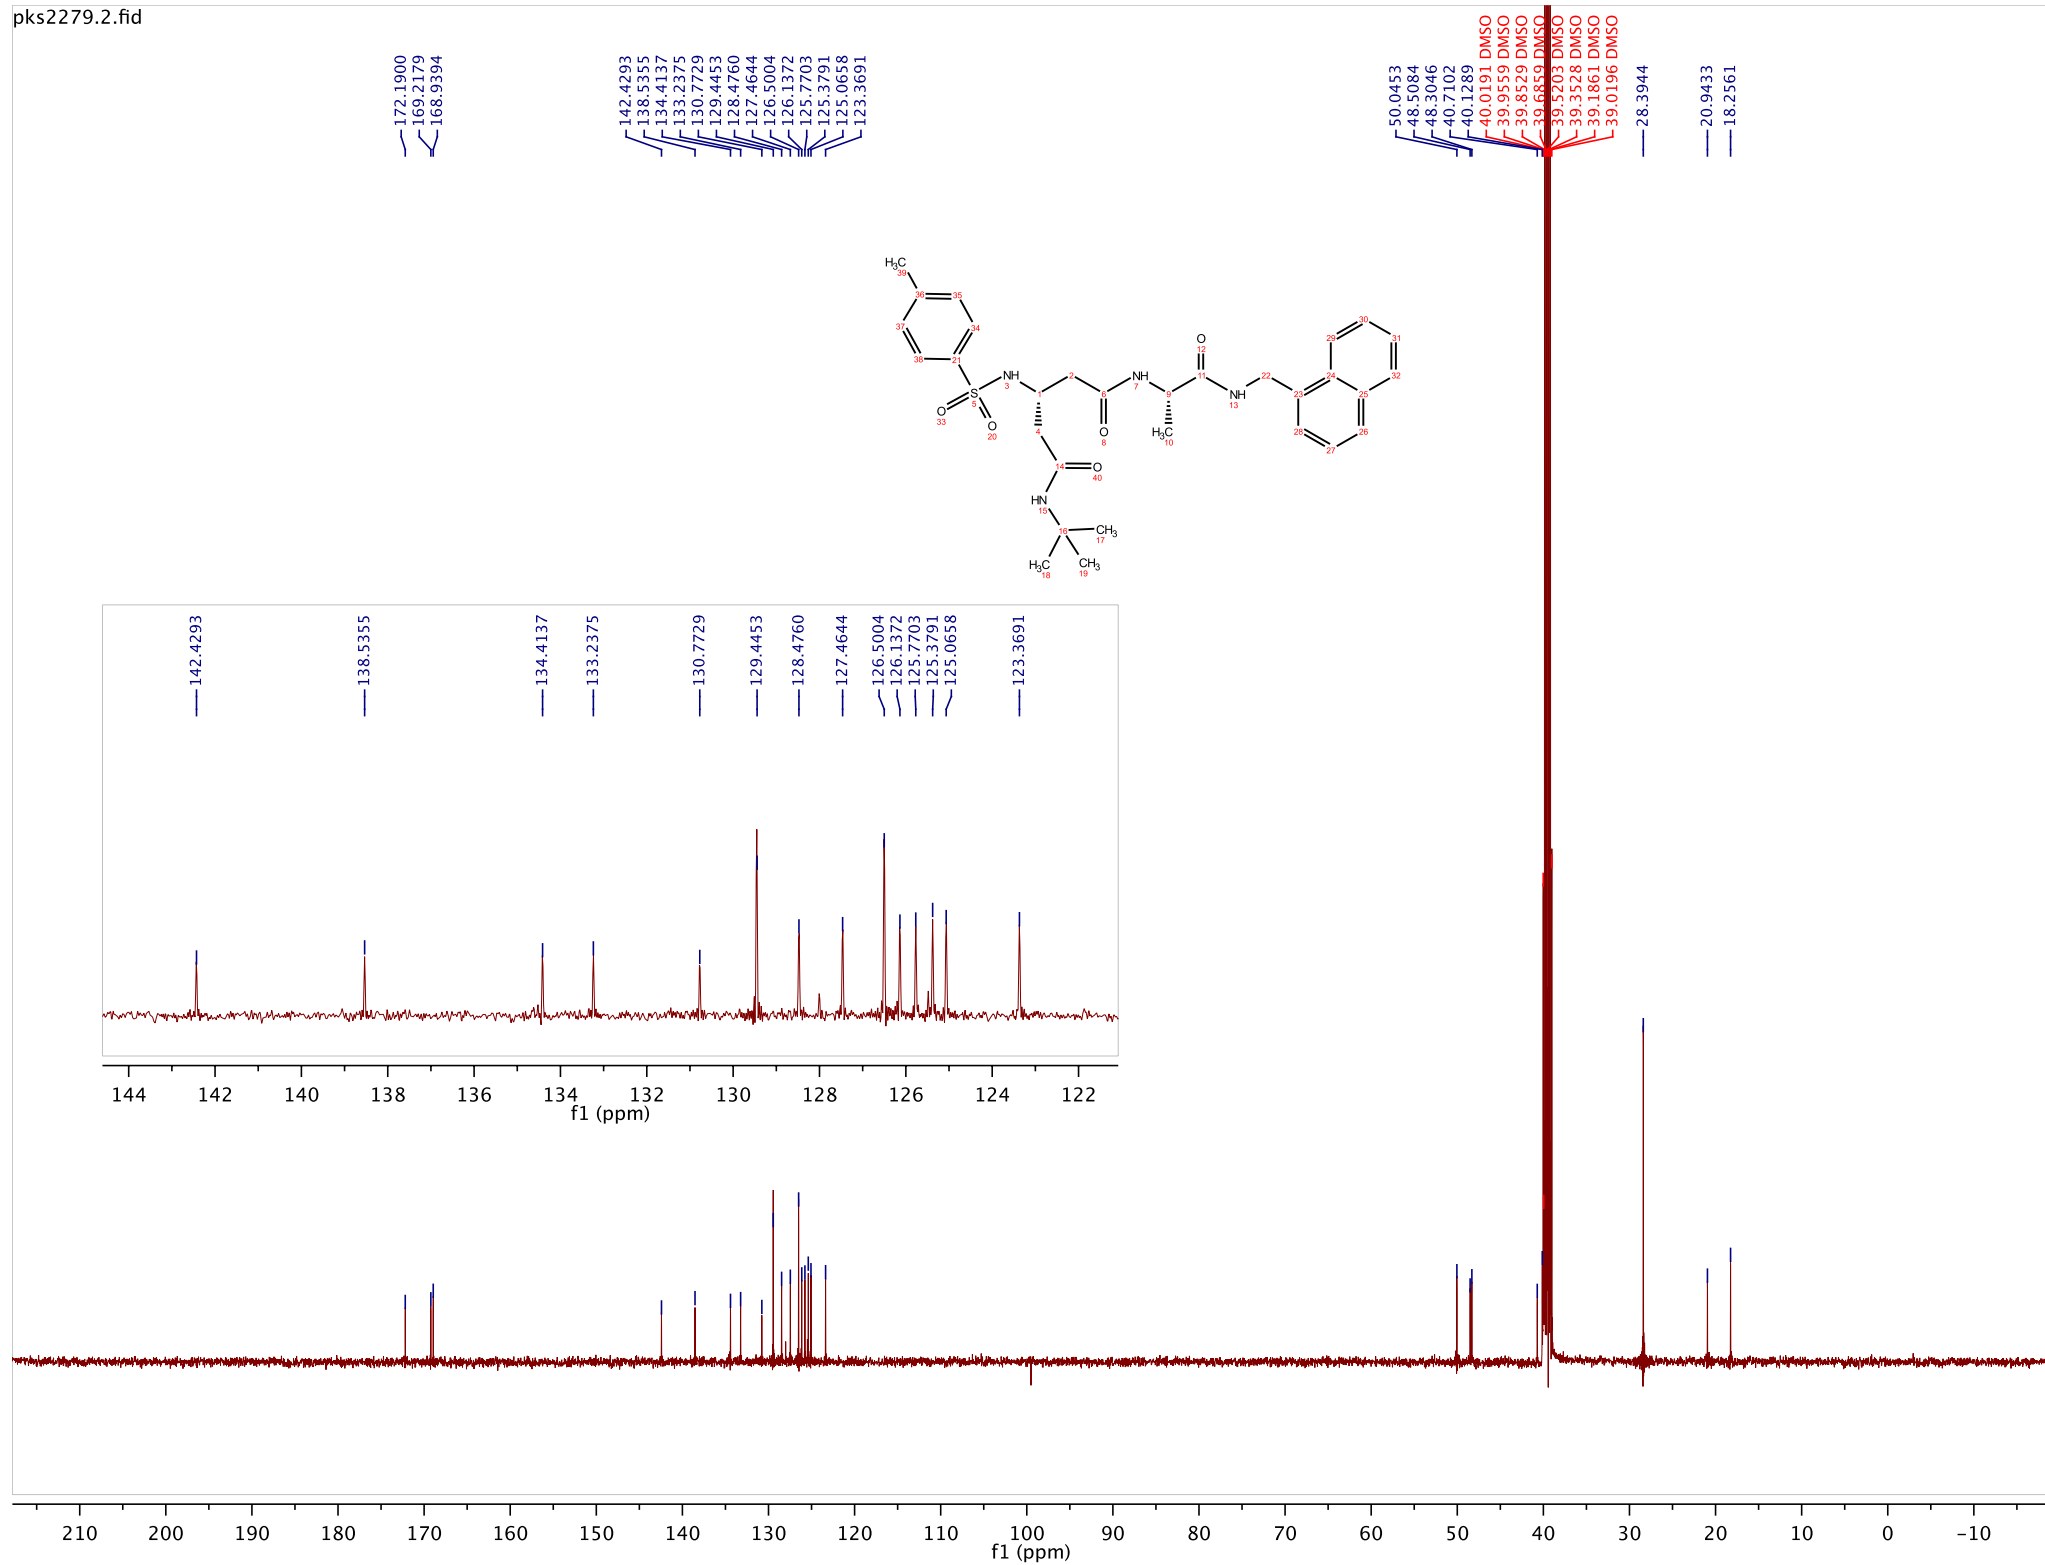

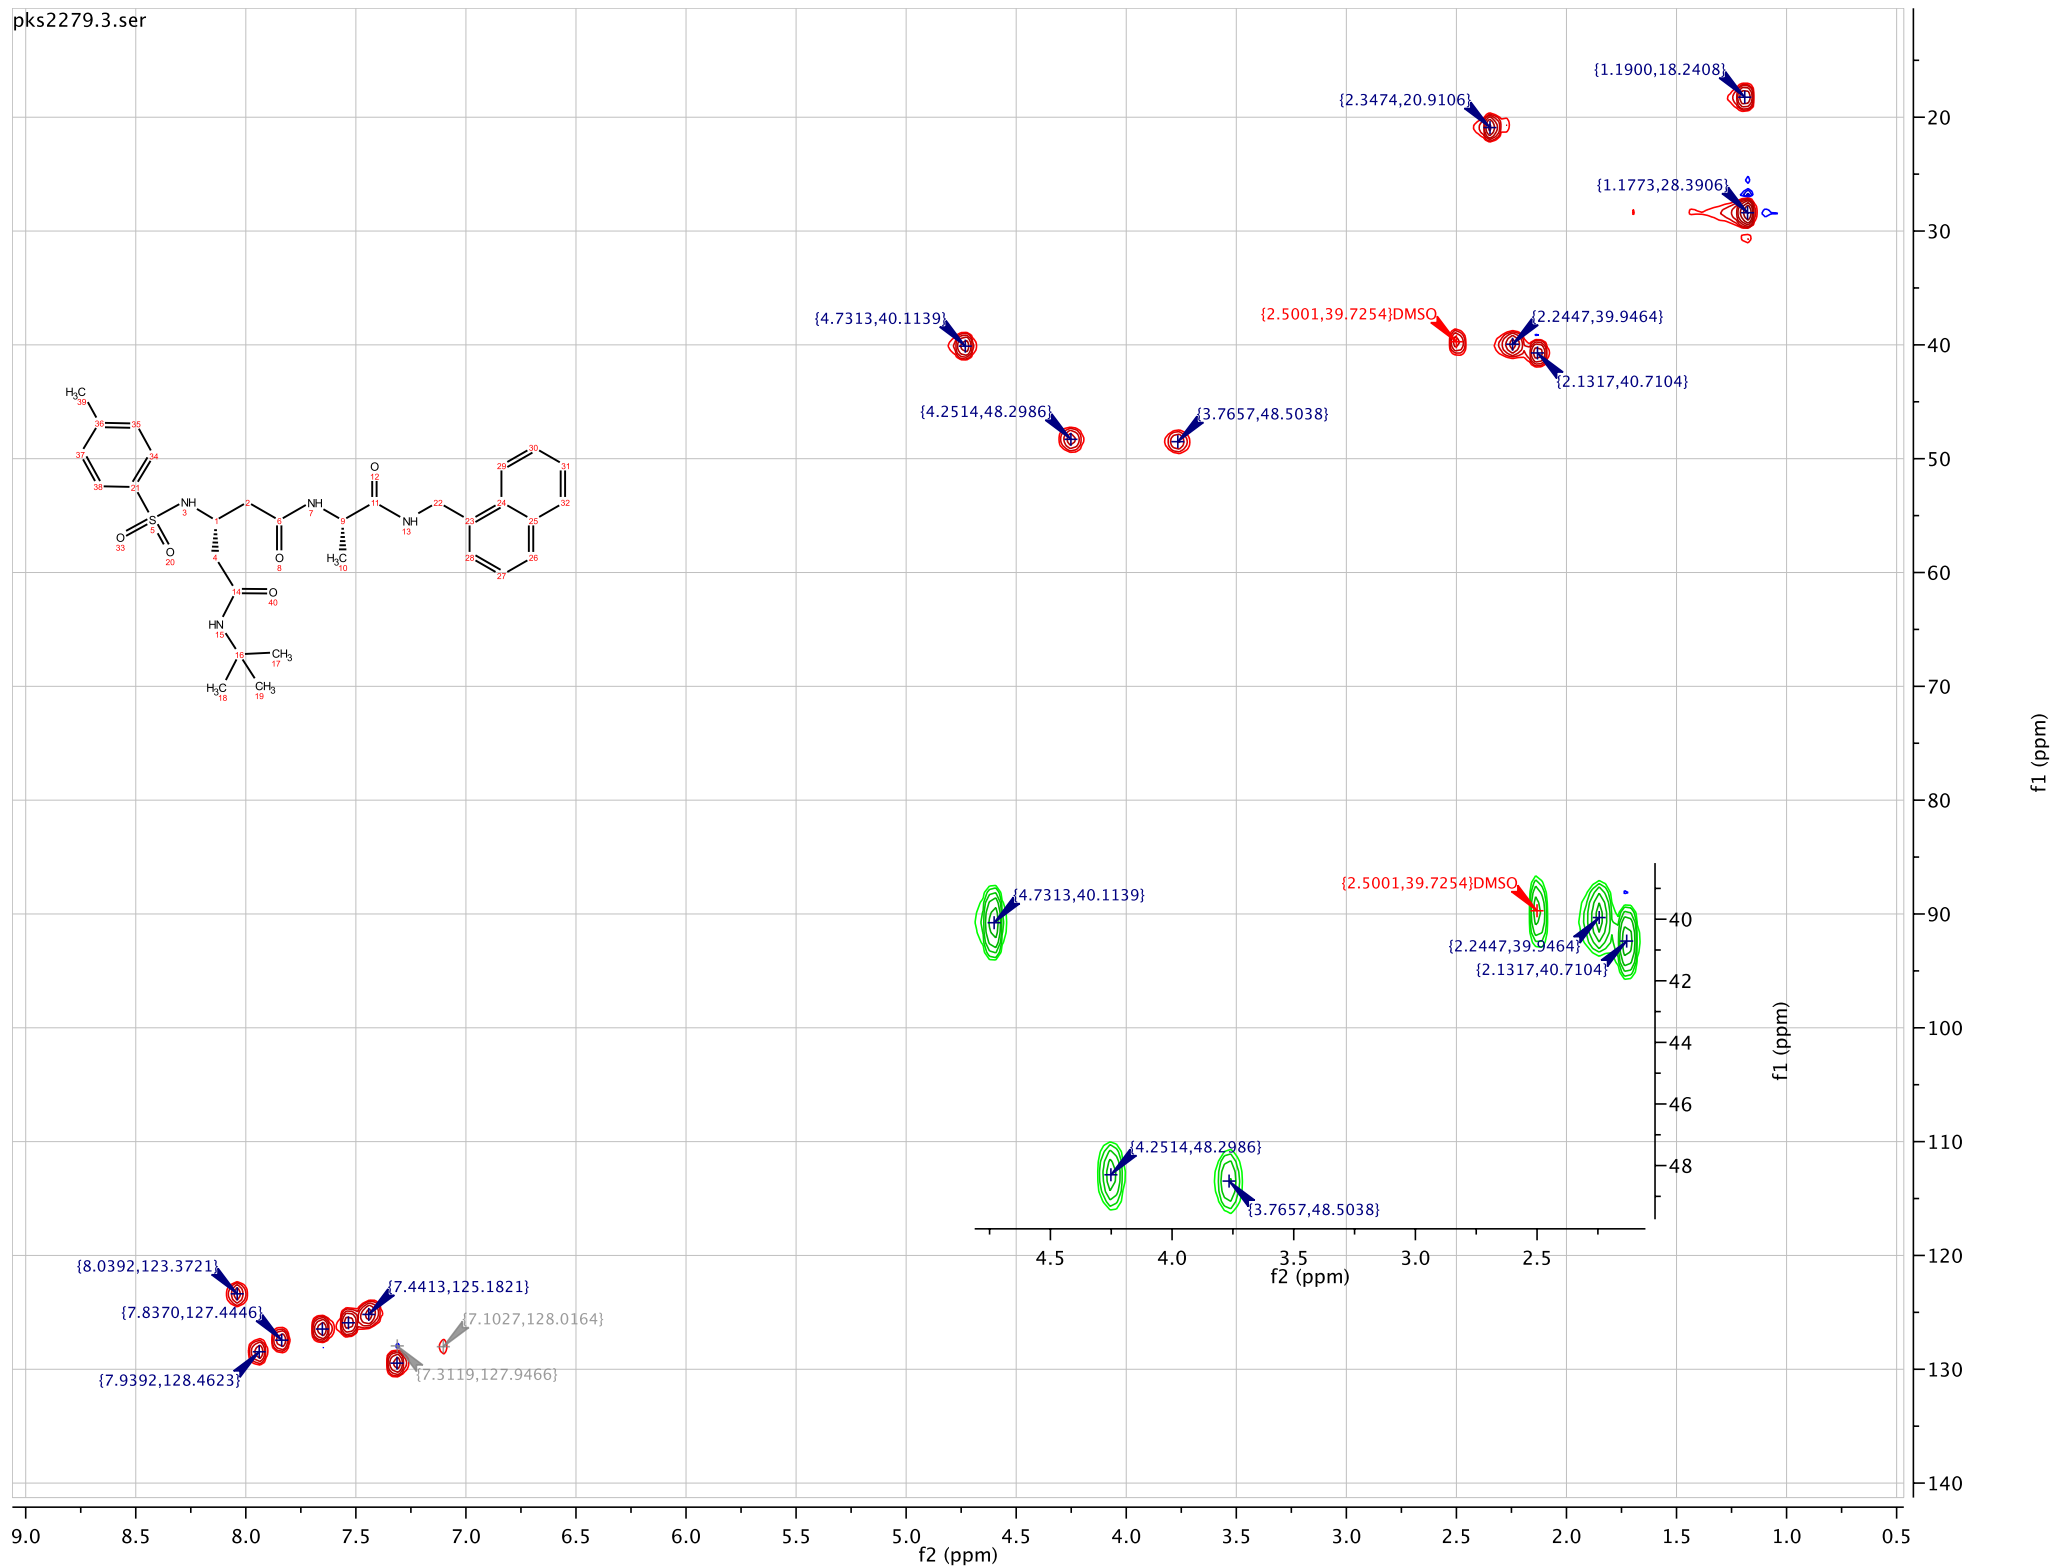

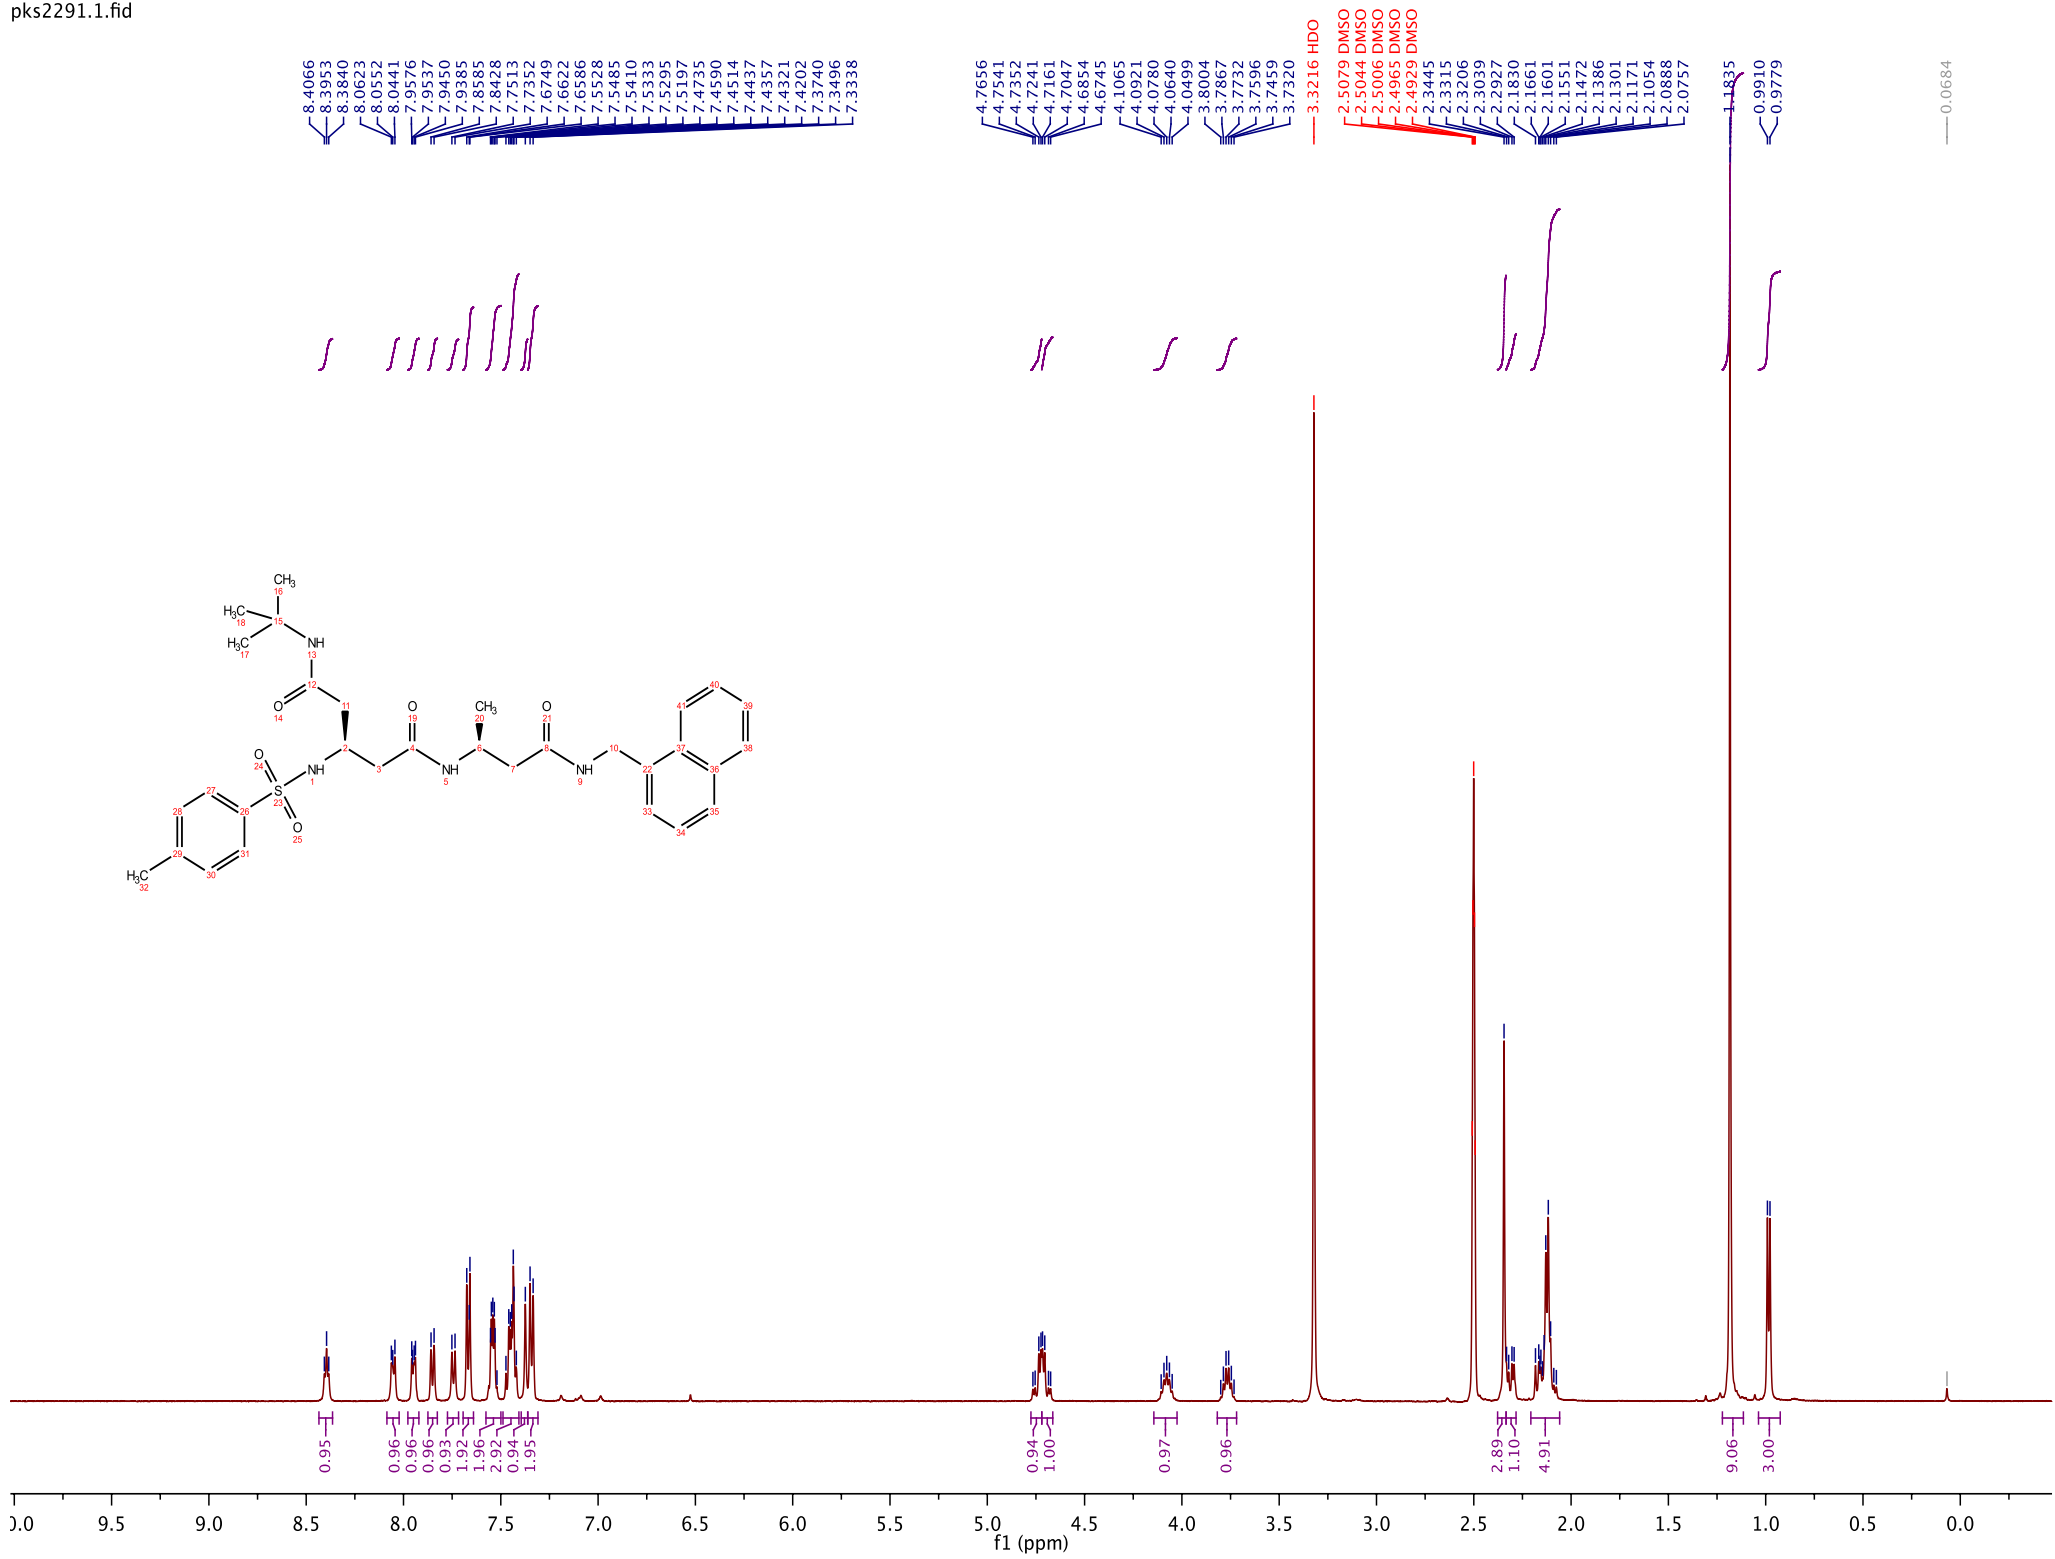

pks2291/2\_BRB  
C13CPD DMSO /opt prs2016 19

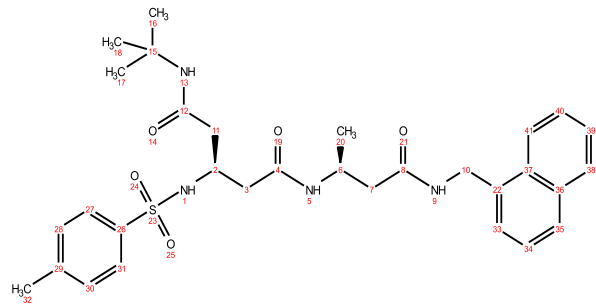

169.7795  
168.9418  
168.3629

142.4281  
138.6539  
133.2752  
130.8618  
129.4661  
128.4800  
127.5575  
126.4879  
126.1717  
125.7954  
125.5637  
125.3606  
123.5162

50.0171  
48.5221

42.1875  
41.9299  
40.8450

28.4158

20.9328  
19.9807

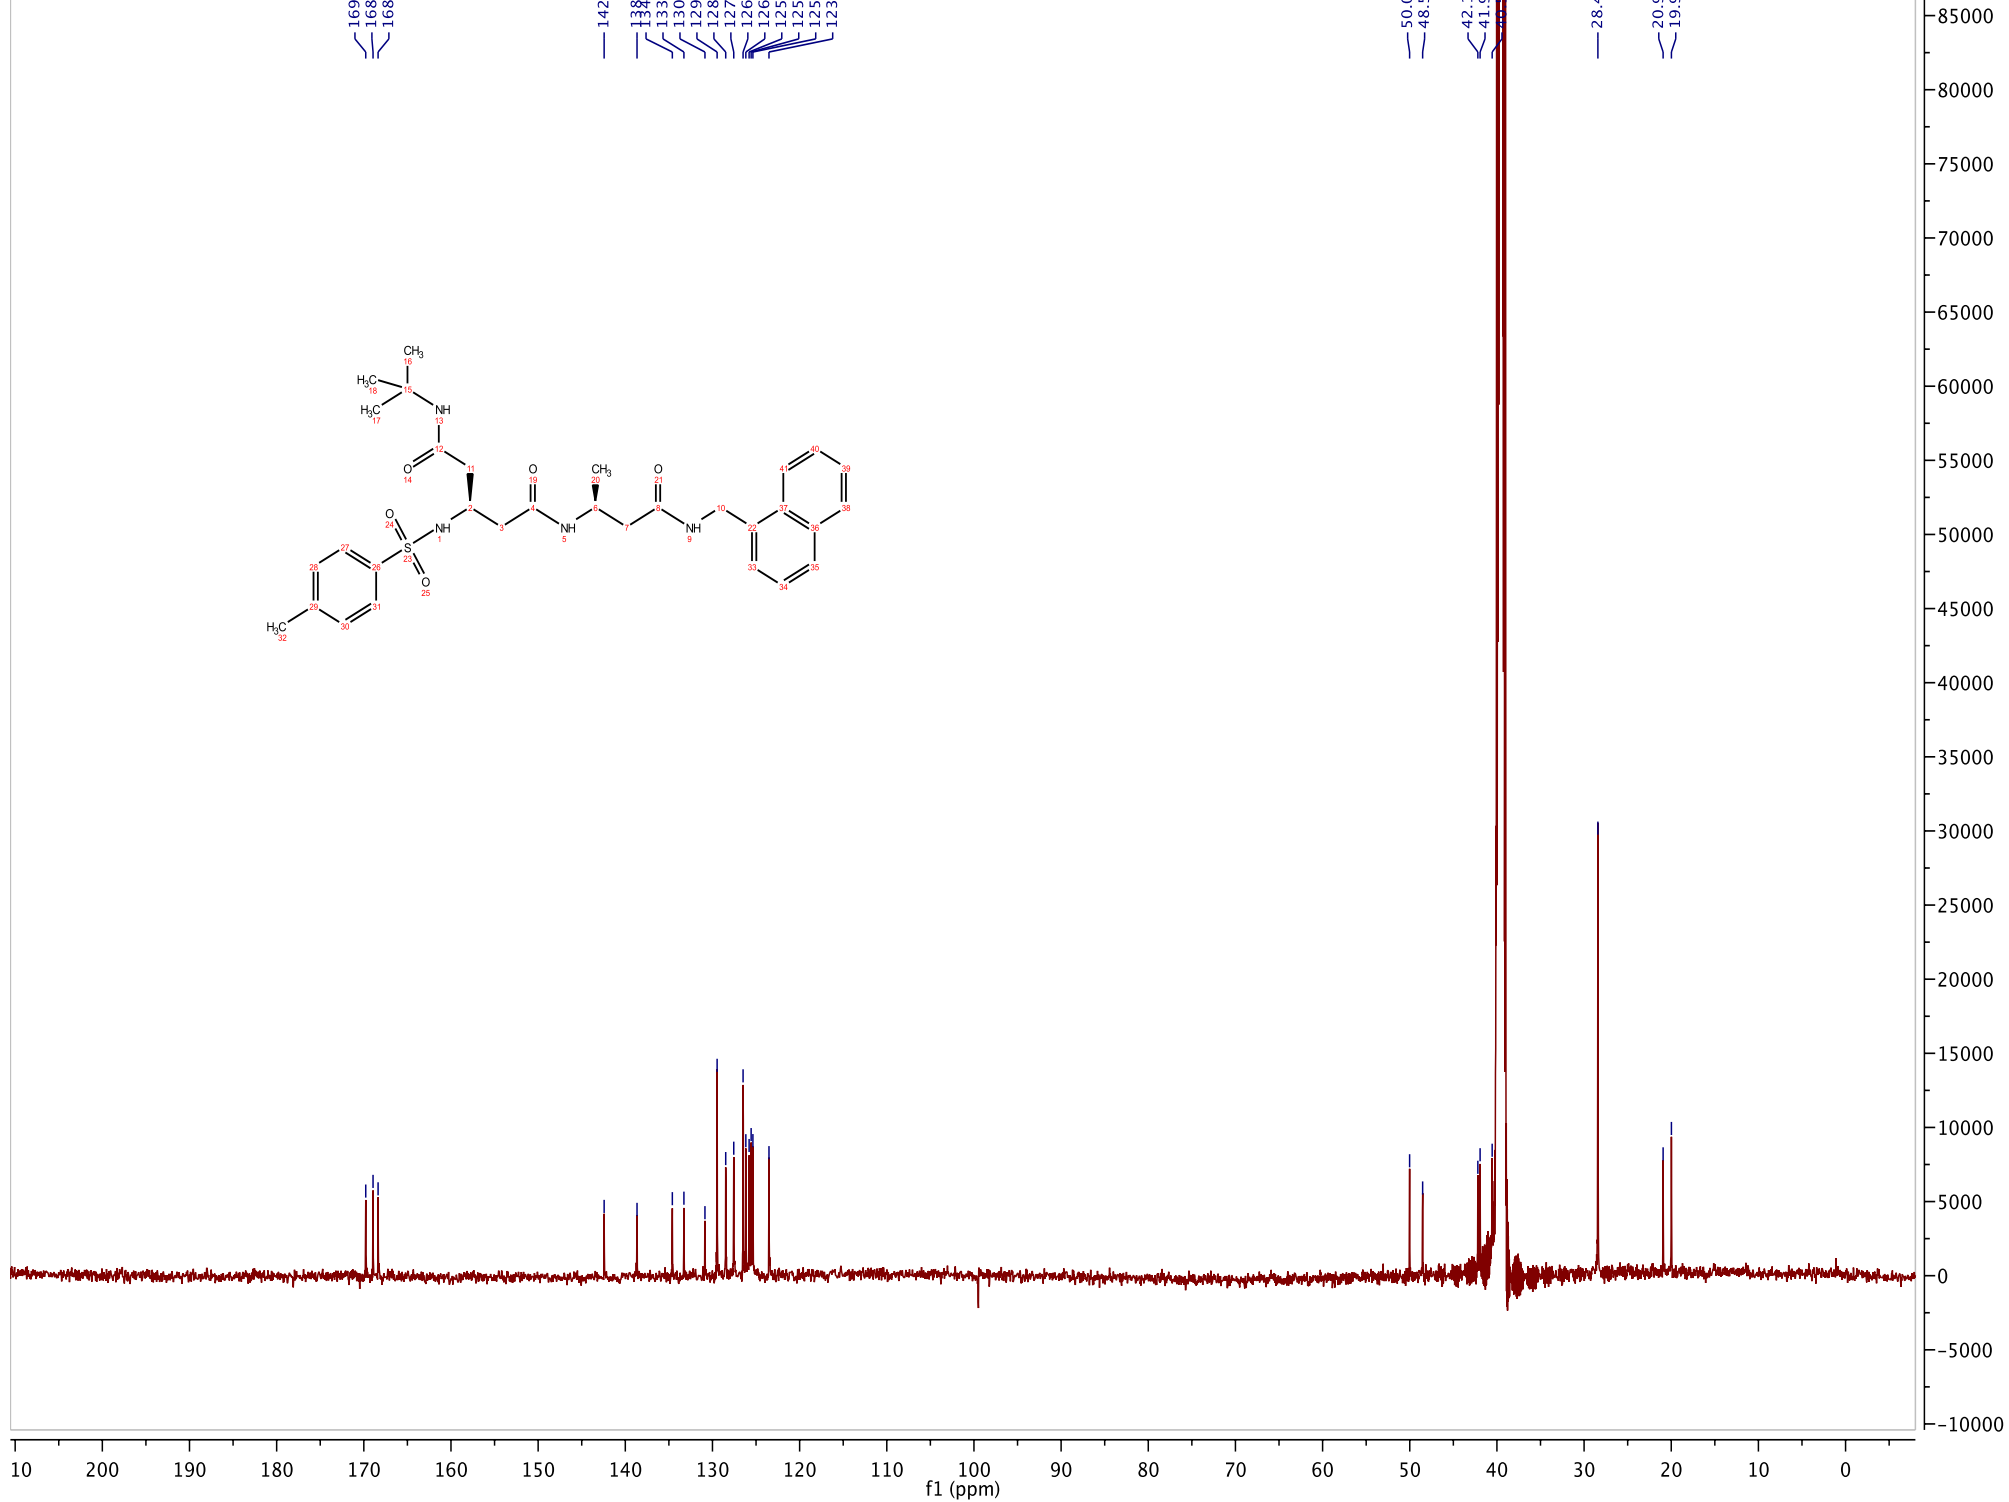

pks2291/1\_BRB  
C13DEPTsp135 DMSO /opt prs2016 19

129.4833  
128.4820  
127.5670  
126.4835  
126.1790  
125.8046  
125.5720  
125.3694  
123.5240

48.5283  
42.1811  
41.9298  
40.5500  
40.1319  
40.0857  
39.9462 DMSO  
39.7769 DMSO  
39.6121 DMSO  
39.4422 DMSO

28.4180

20.9331  
19.9819

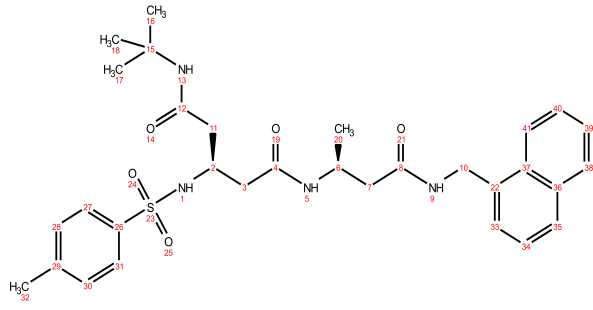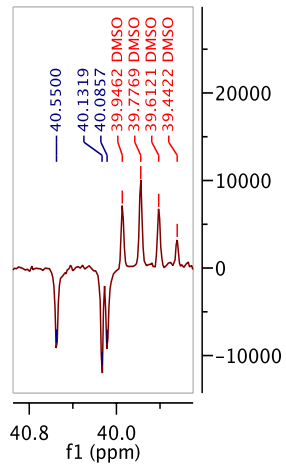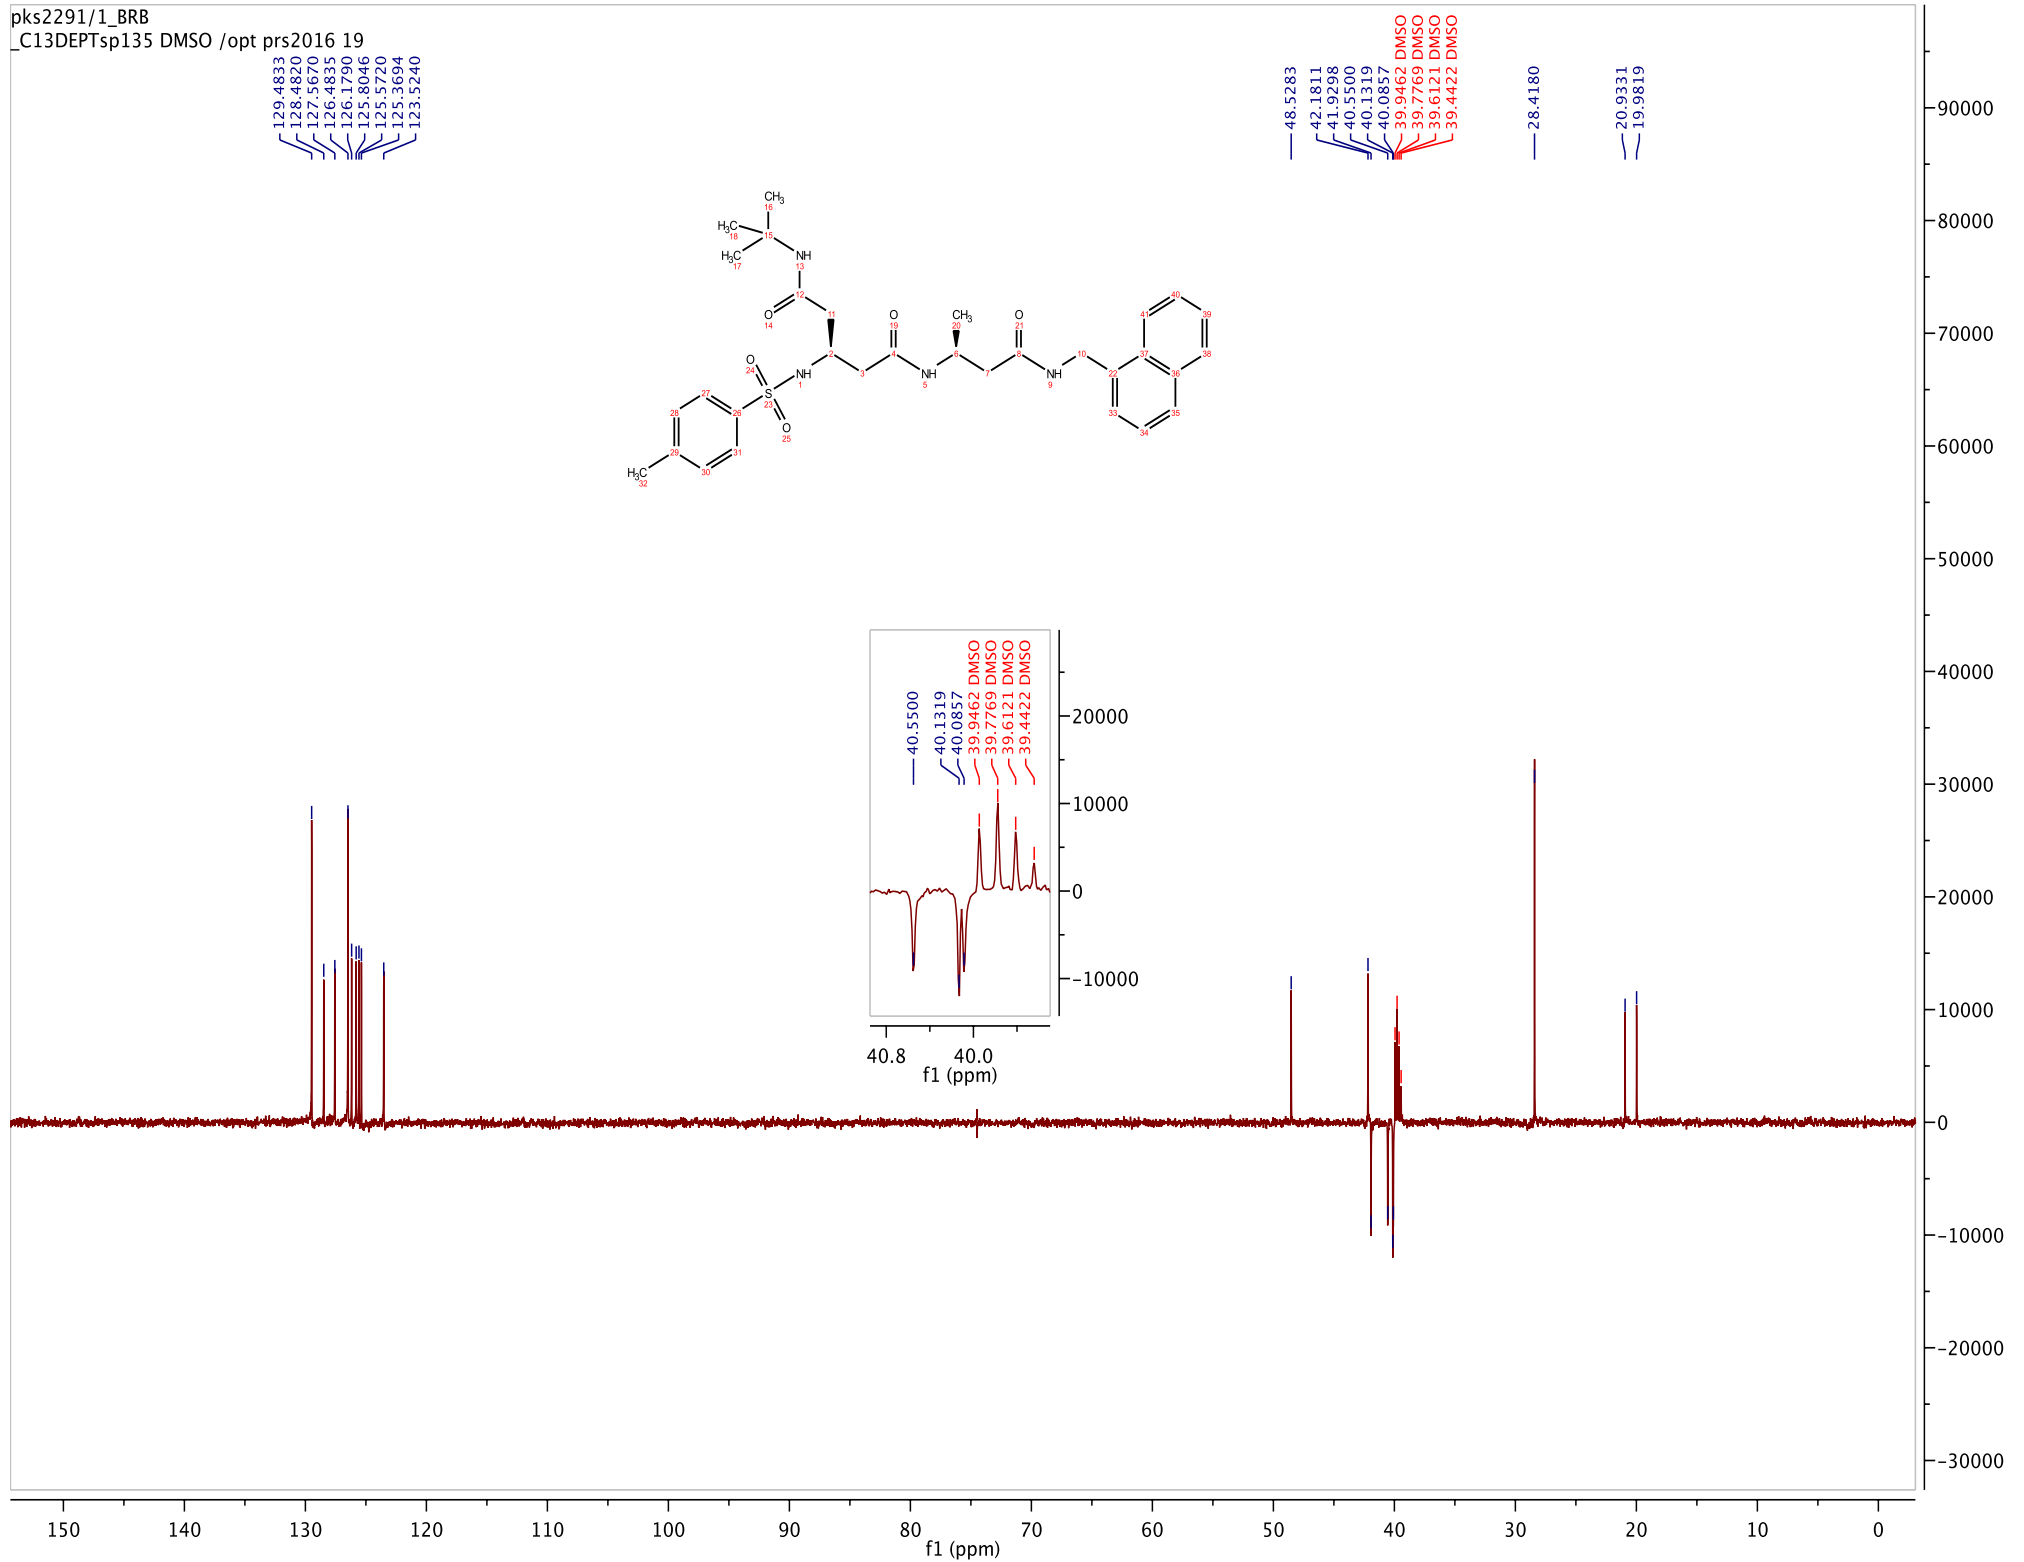



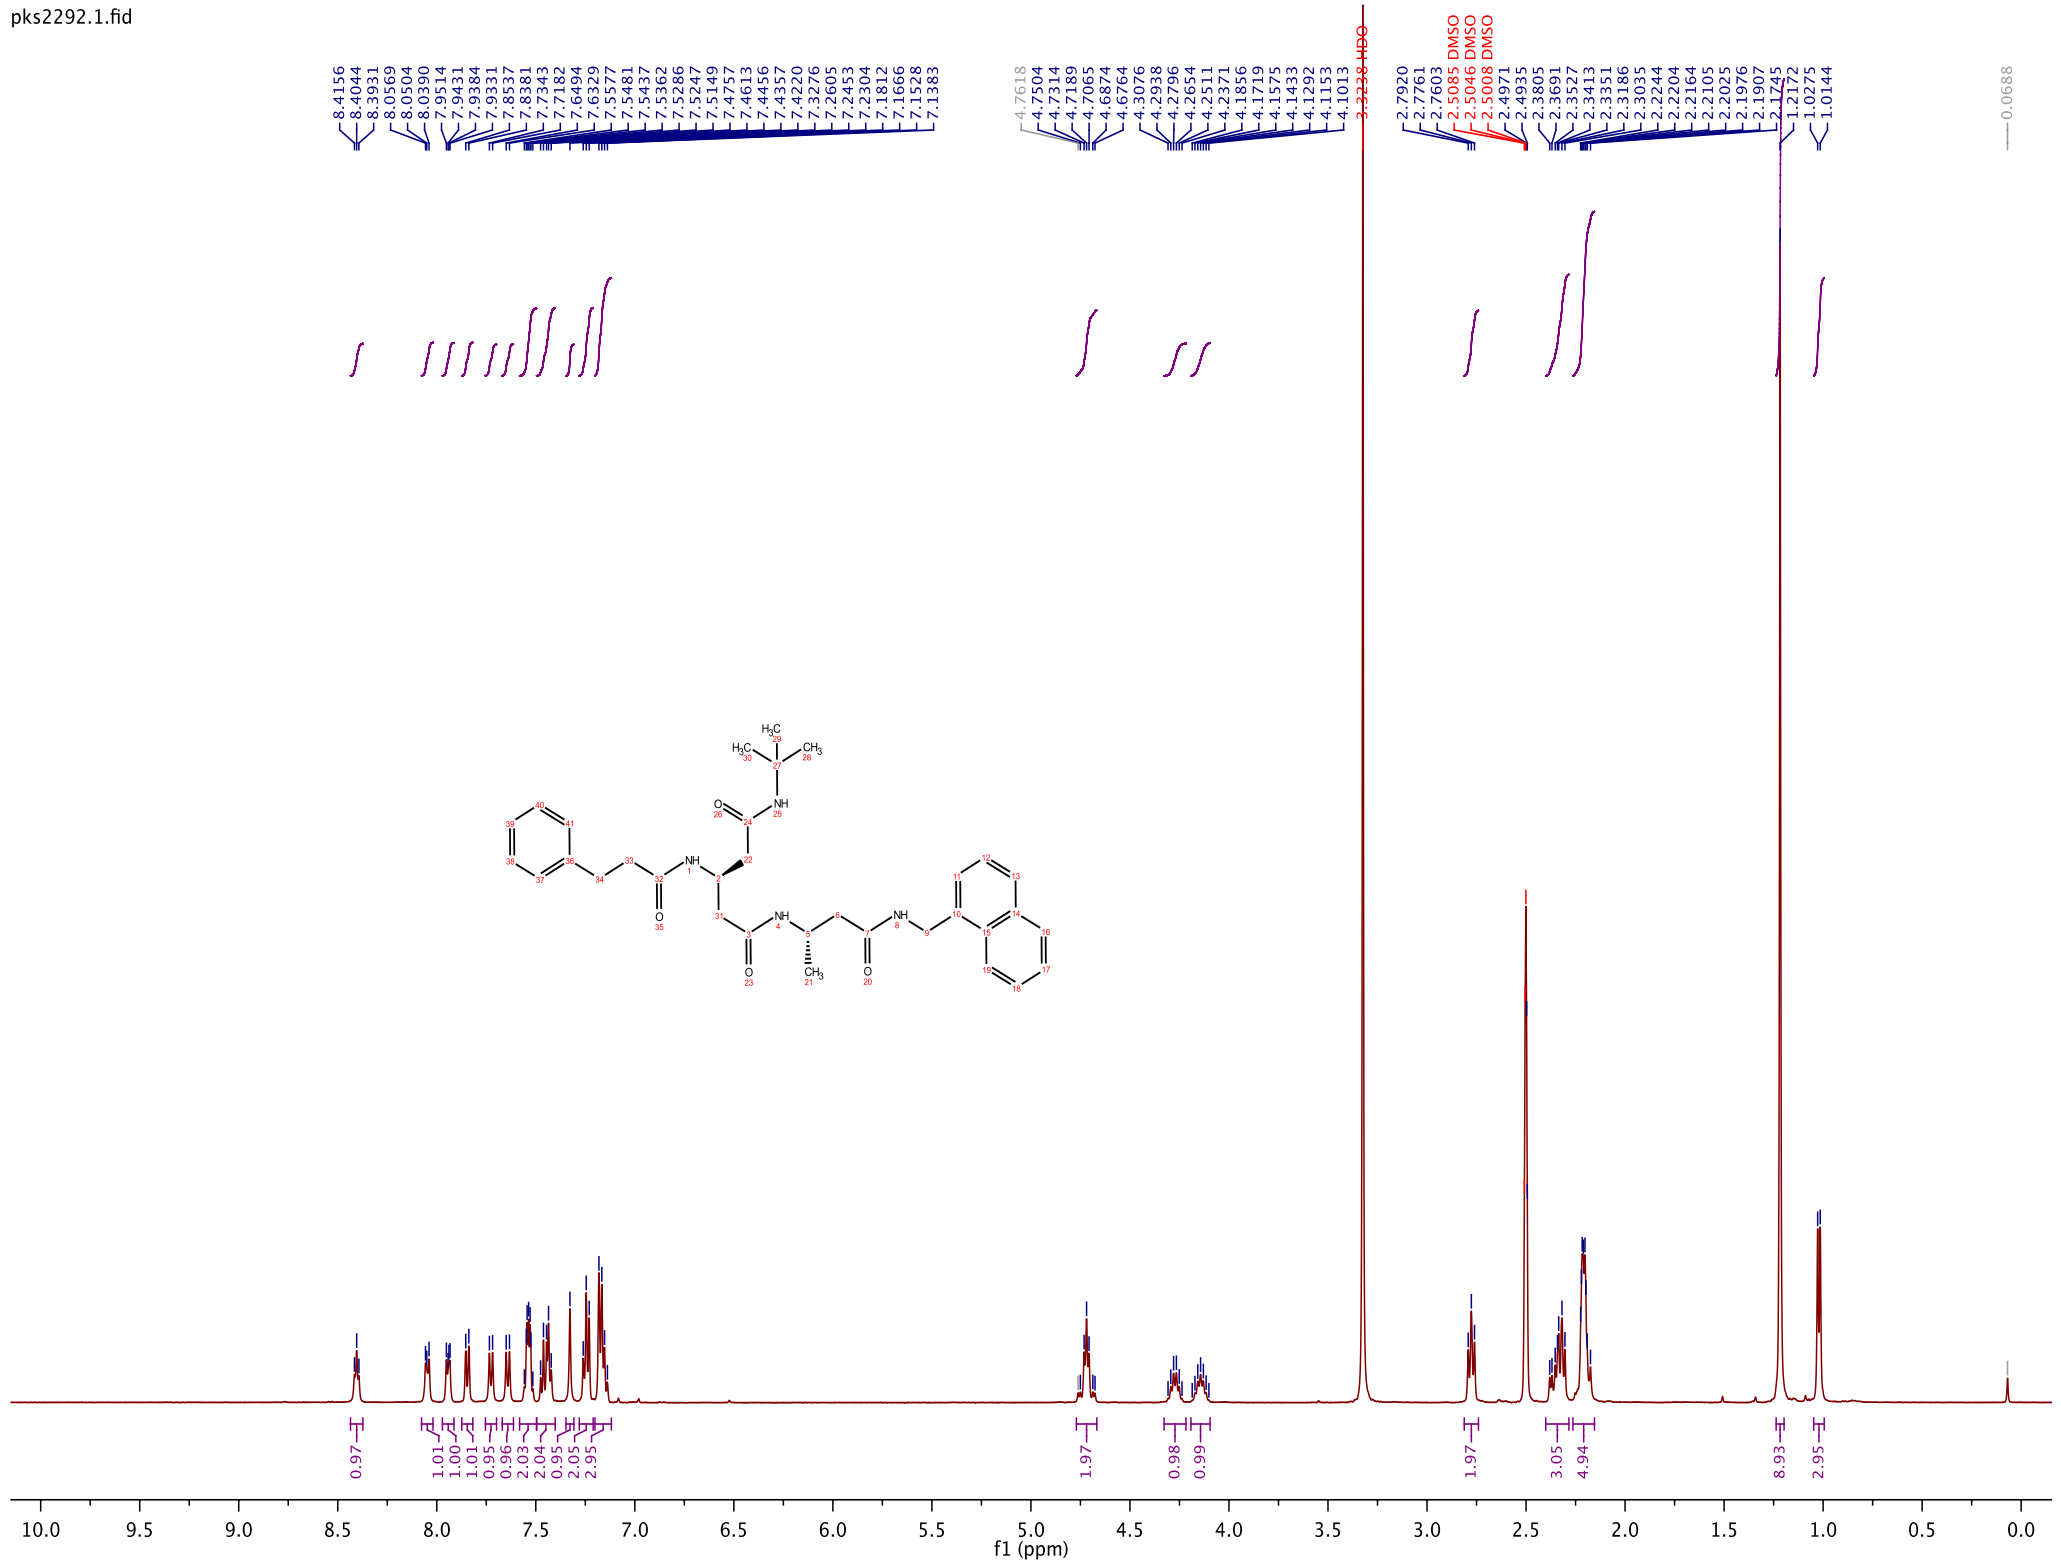

170.4599  
169.8357  
169.4203  
168.7843

141.3108  
134.6134  
133.2727  
130.8692  
128.4672  
128.2550  
128.0889  
127.5583  
126.1798  
125.8024  
125.5723  
123.3661  
123.5114

49.9403  
44.2232  
42.1647  
42.0422  
40.5857  
40.1290  
37.2206  
31.1937  
28.4750  
20.0634

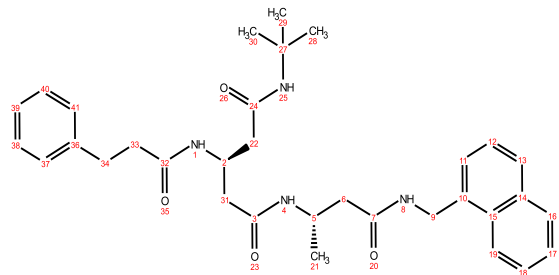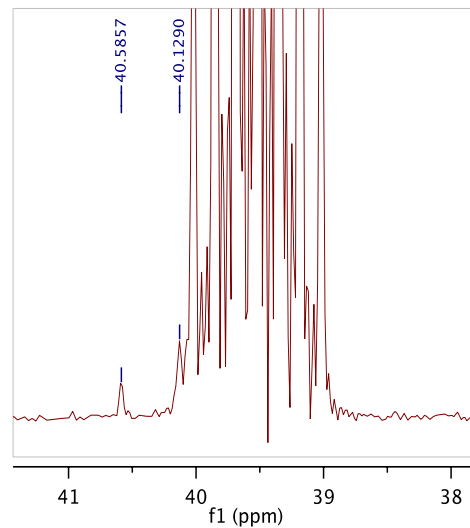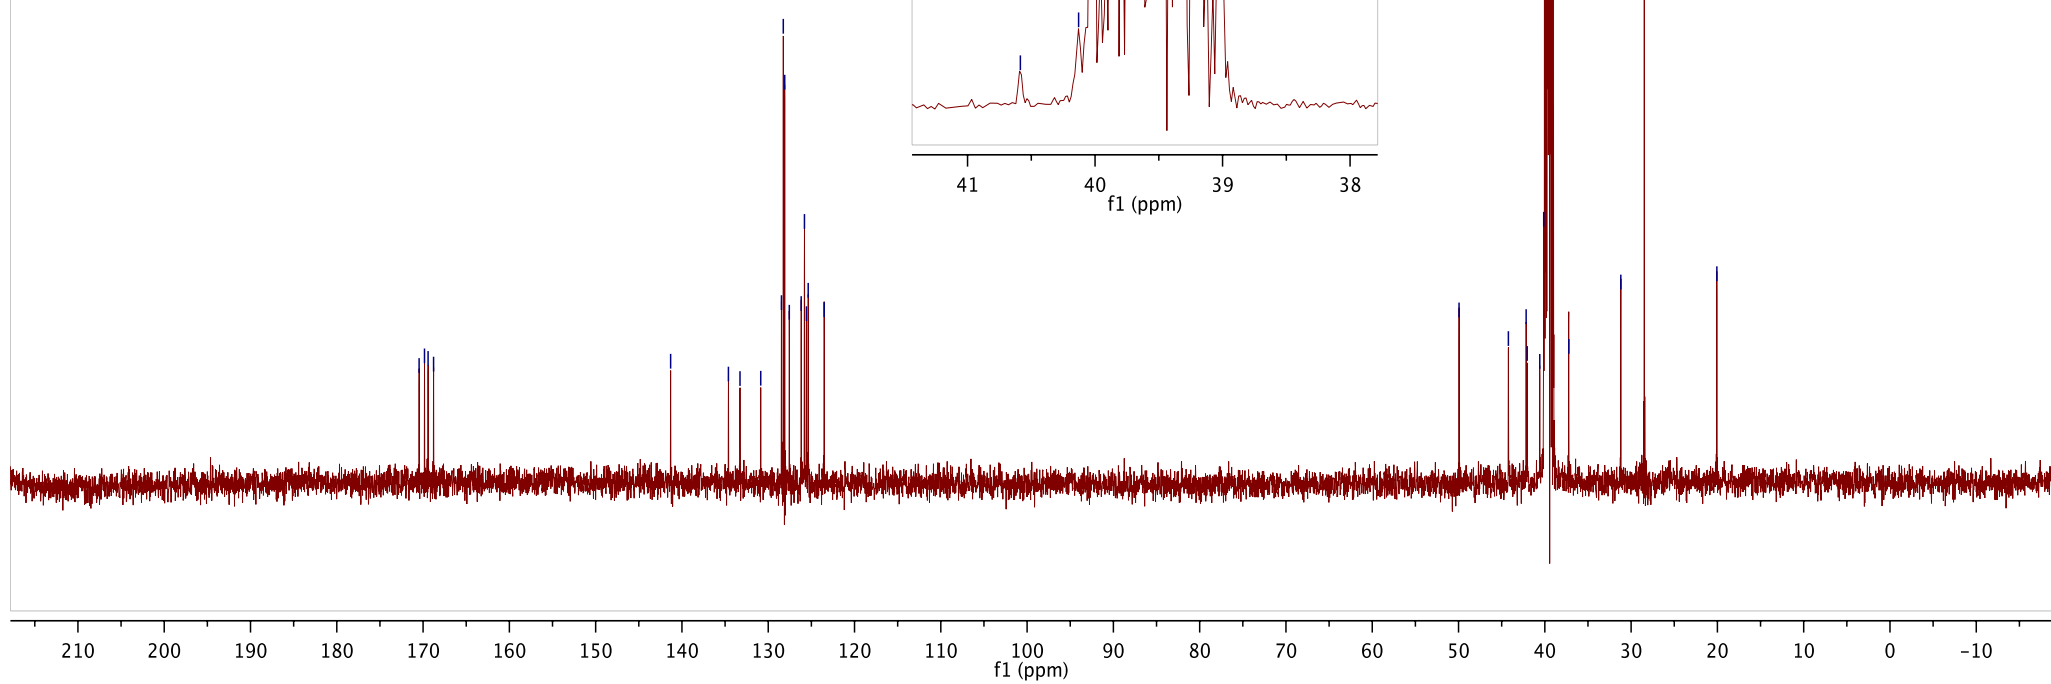

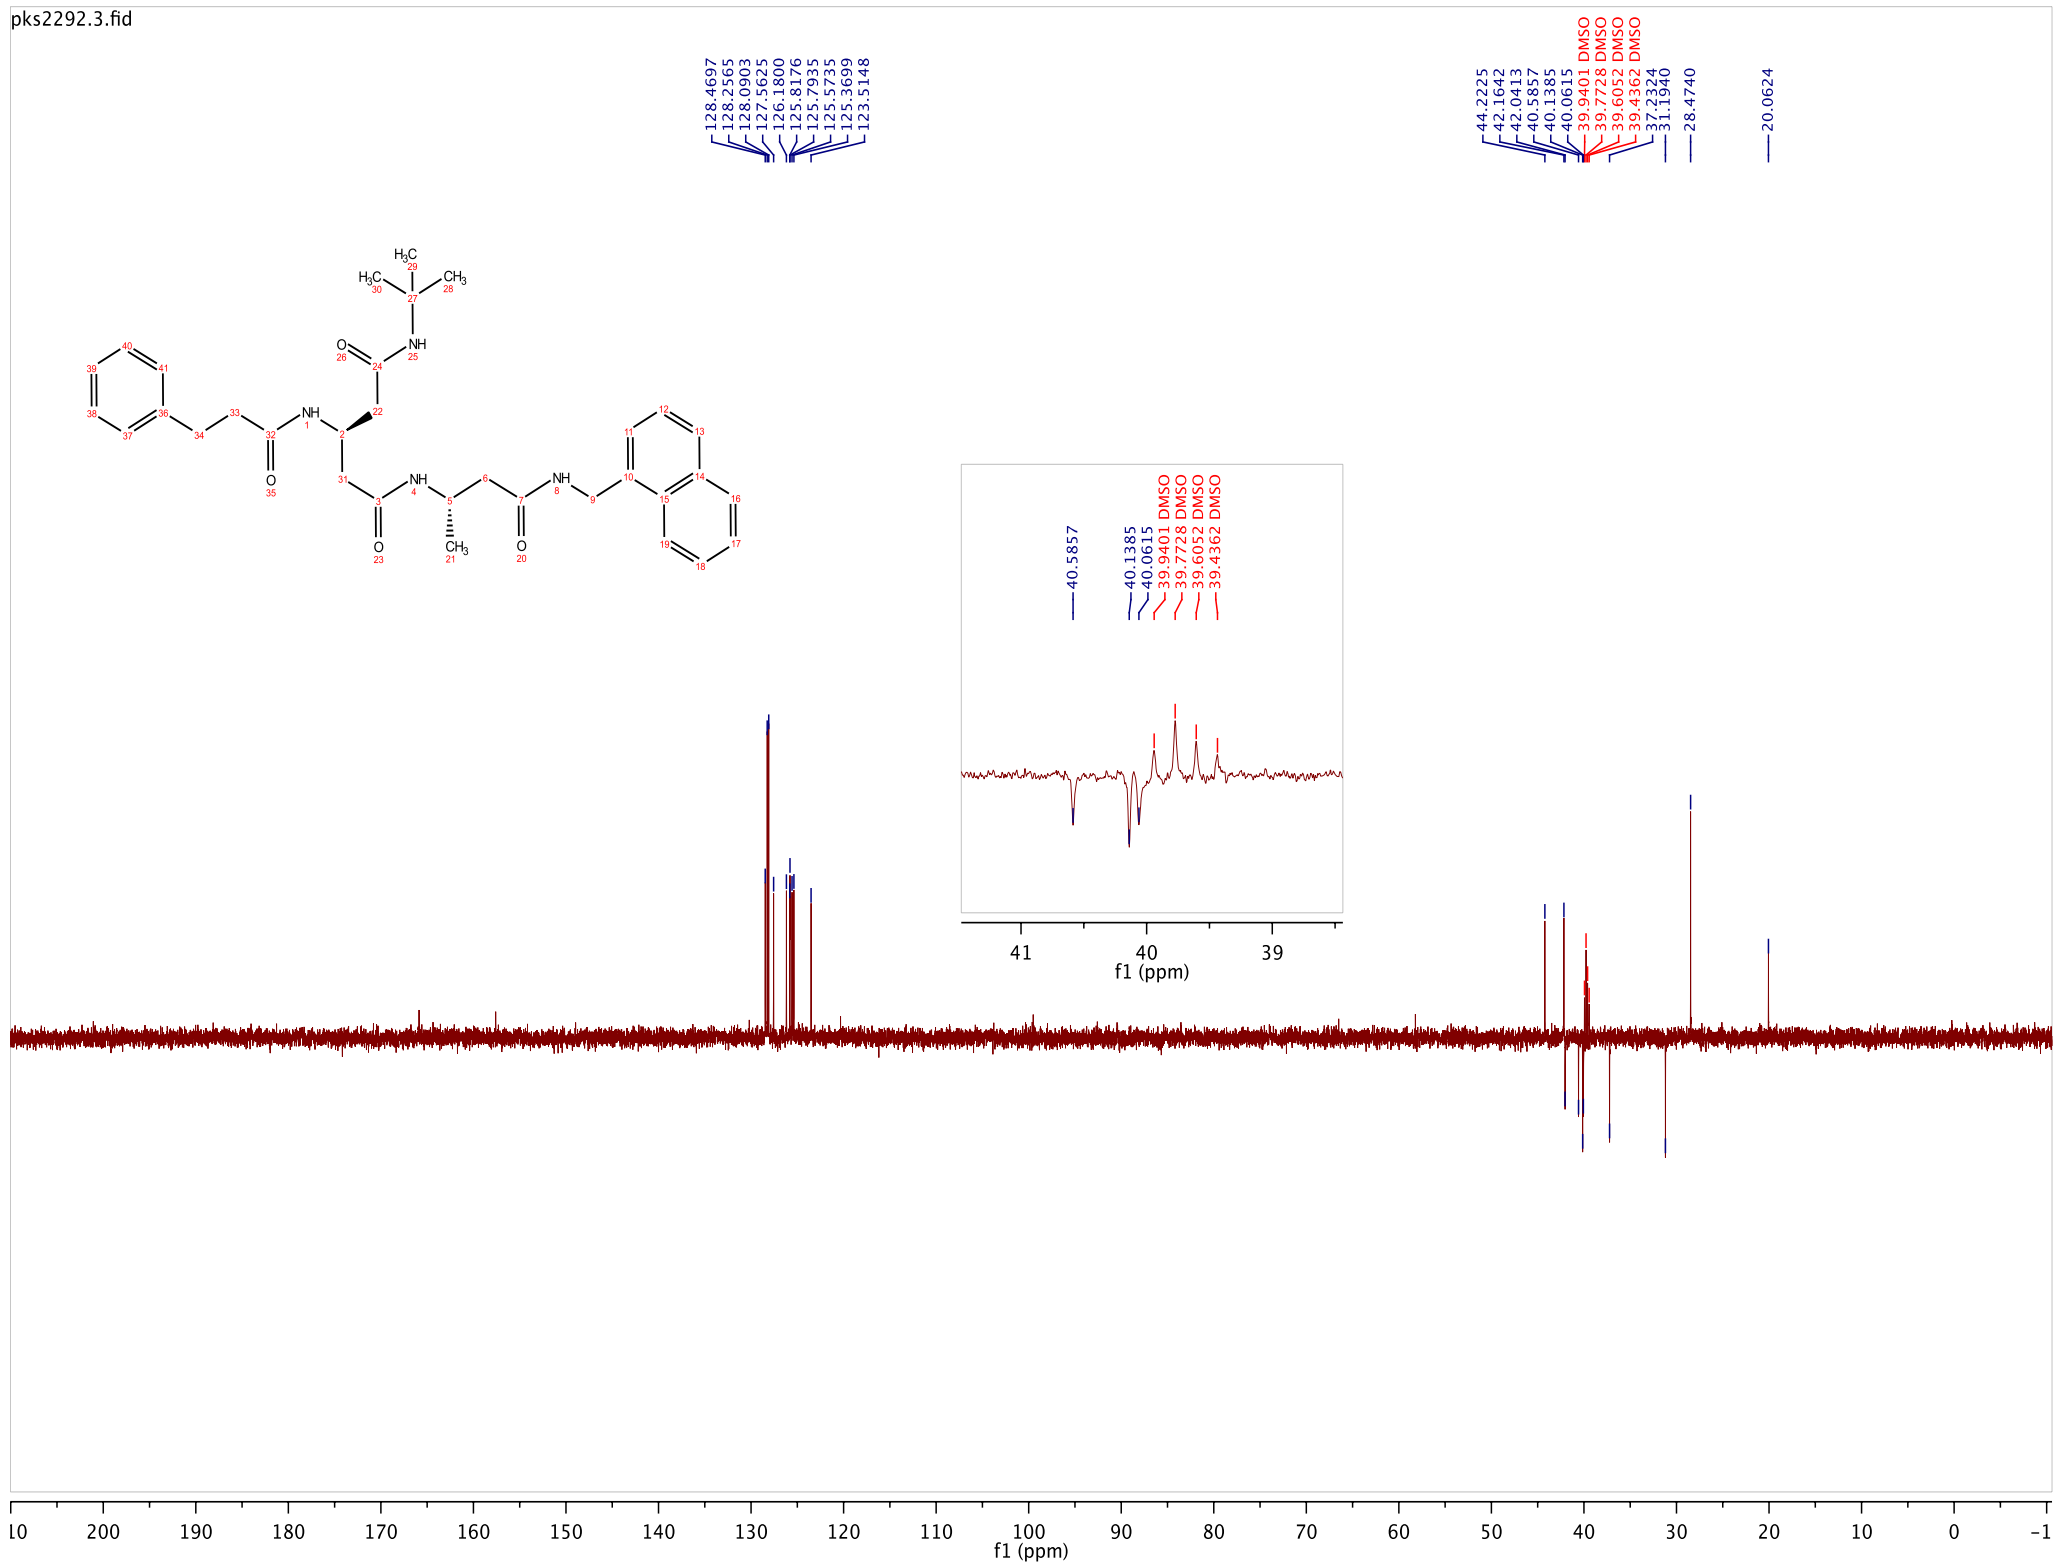

PKS2292

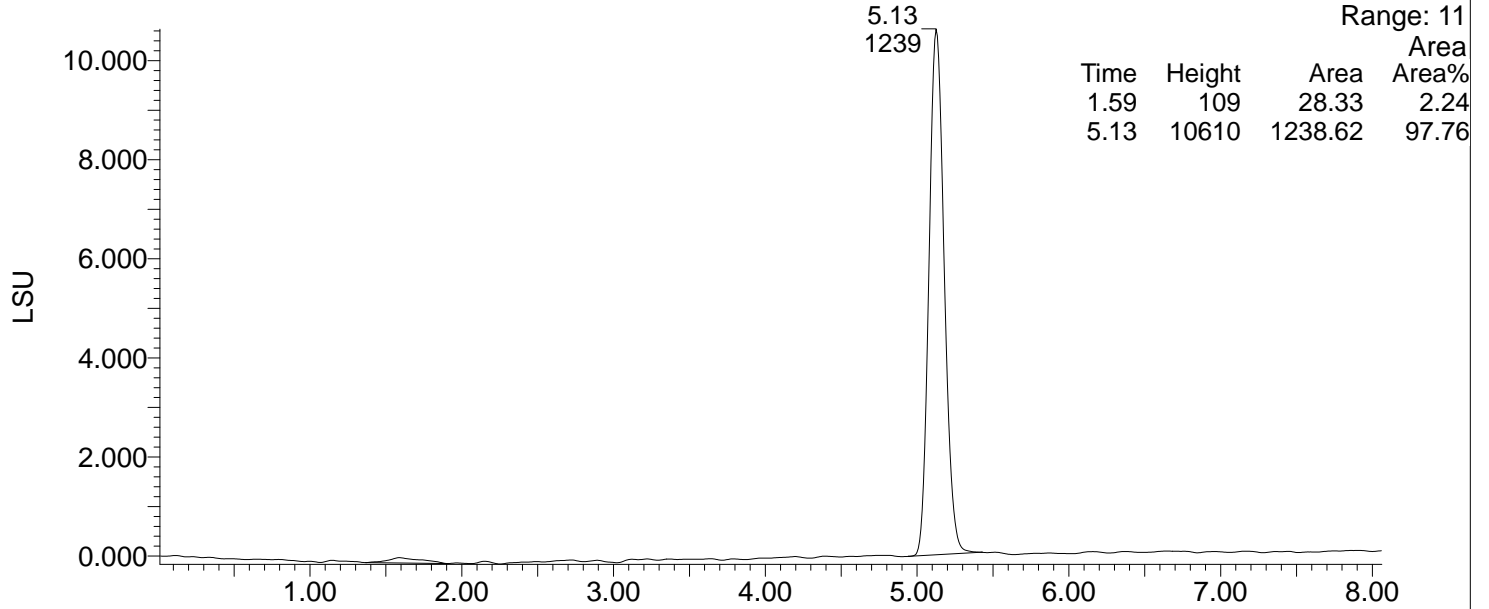

PKS3054

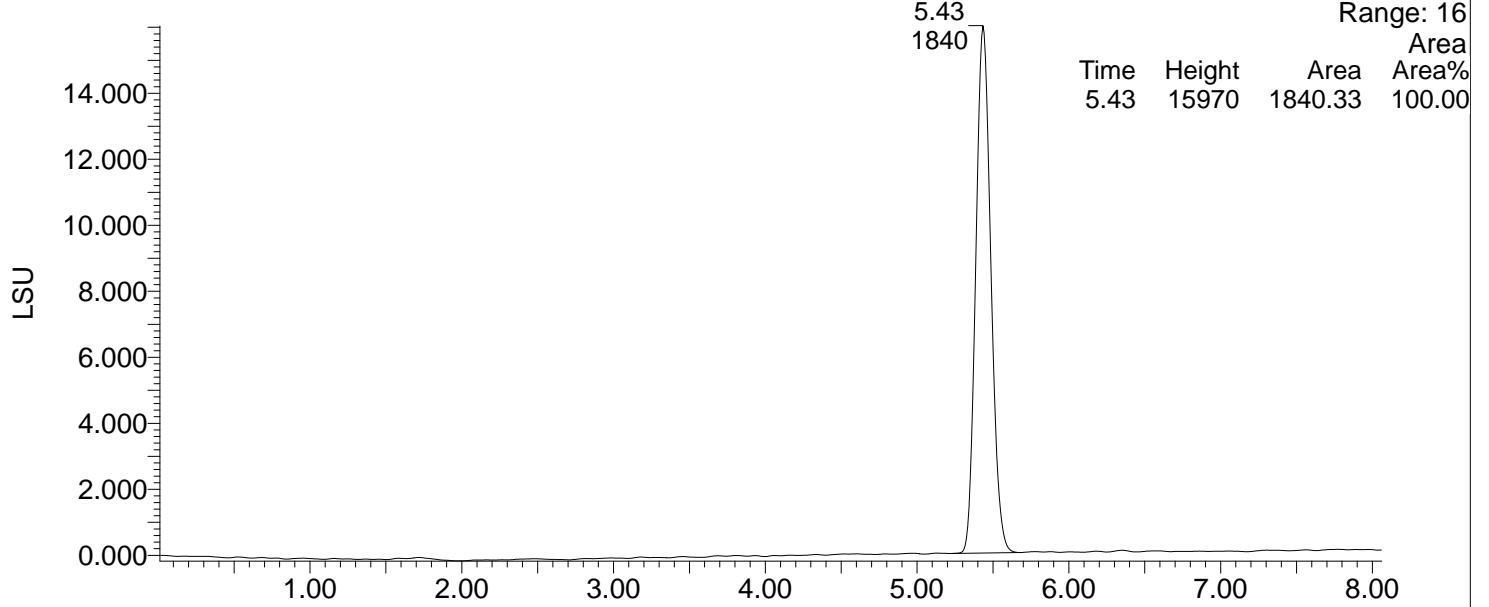

PKS2295

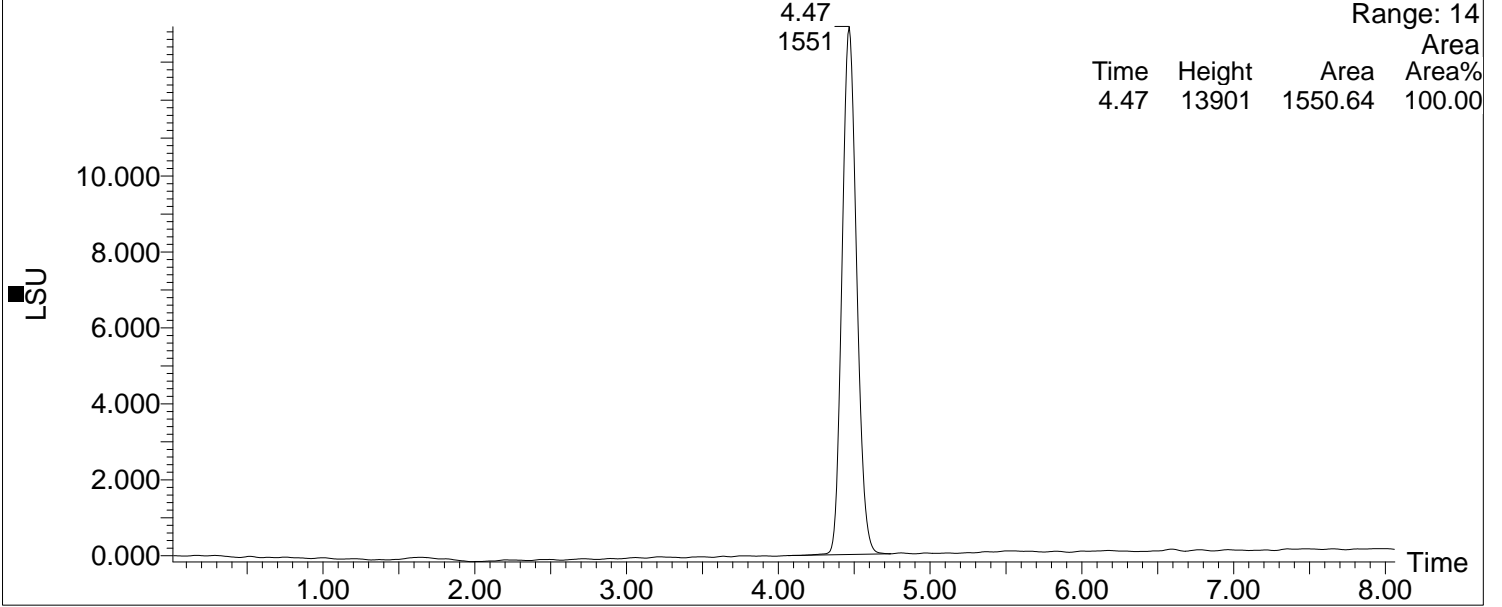

PKS2291

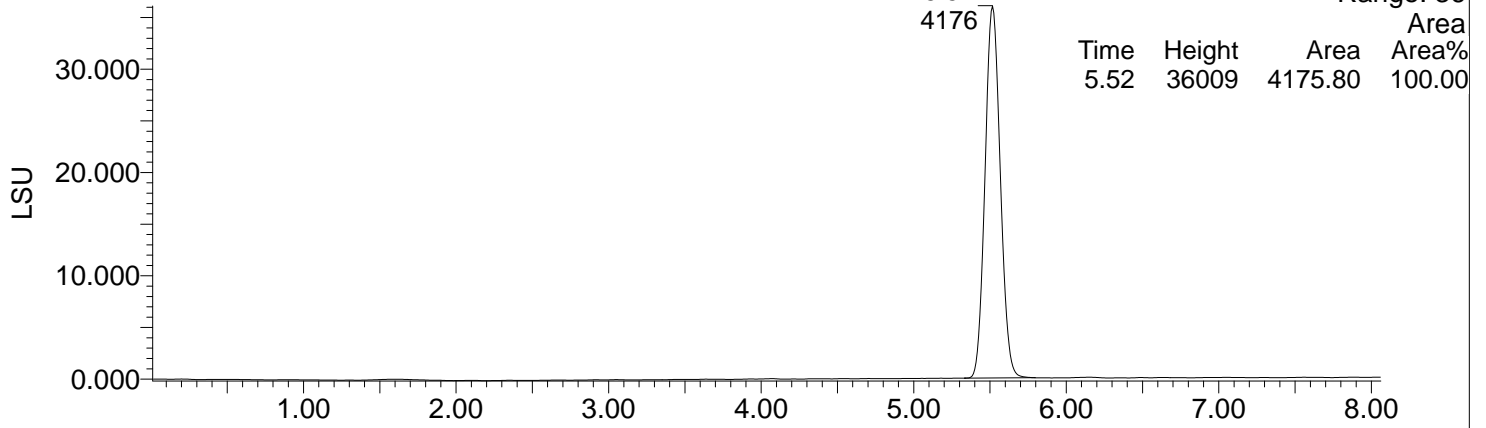

PKS2279

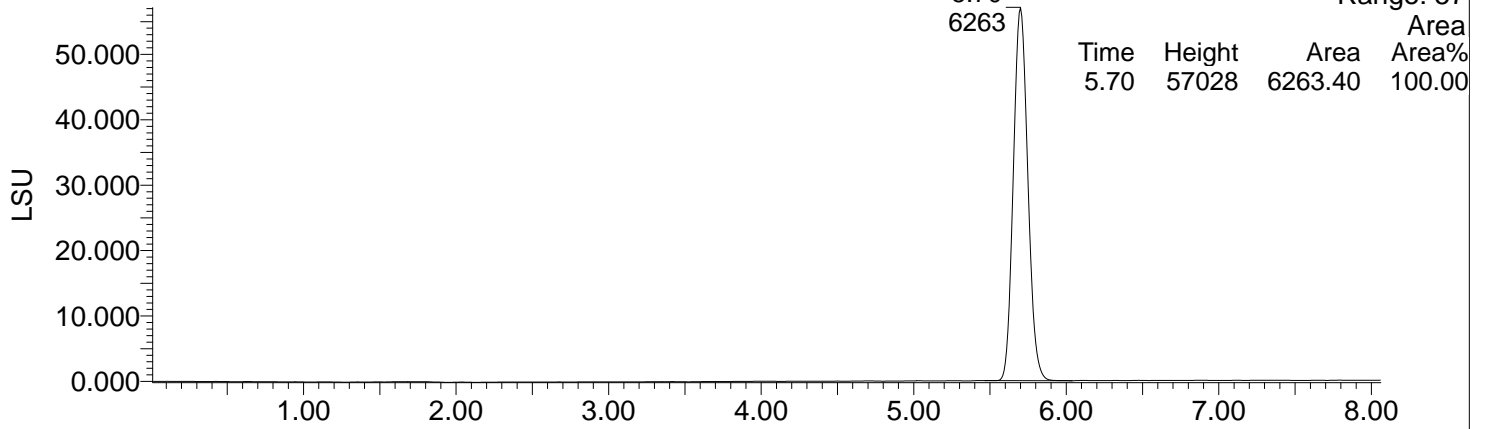

PKS2278

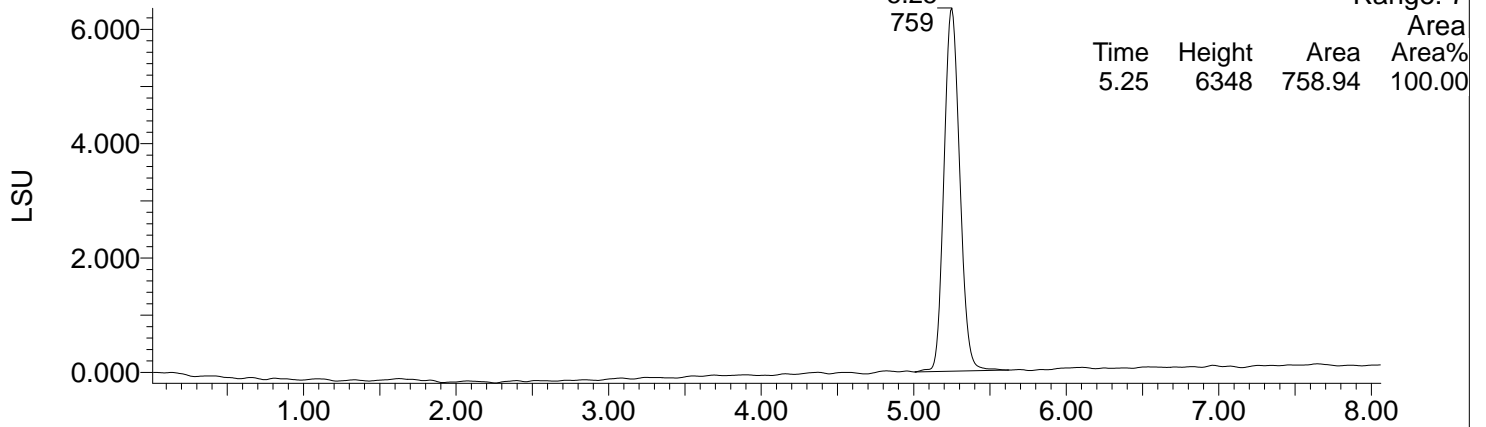

PKS2272

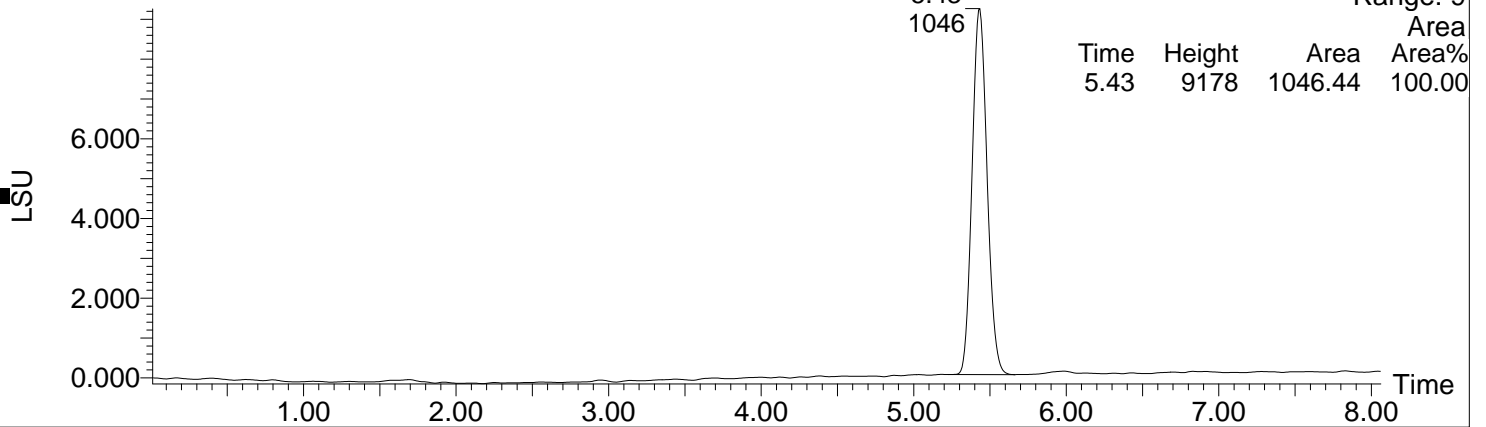

PKS2260

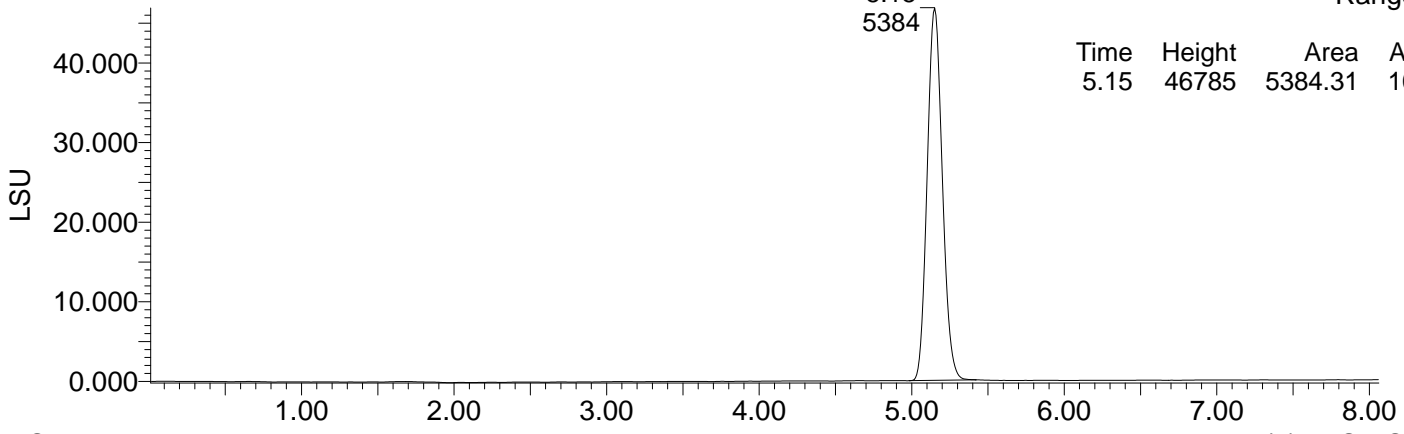

(2) ELSD Signal

Range: 47

| Time | Height | Area    | Area%  |
|------|--------|---------|--------|
| 5.15 | 46785  | 5384.31 | 100.00 |

PKS2252

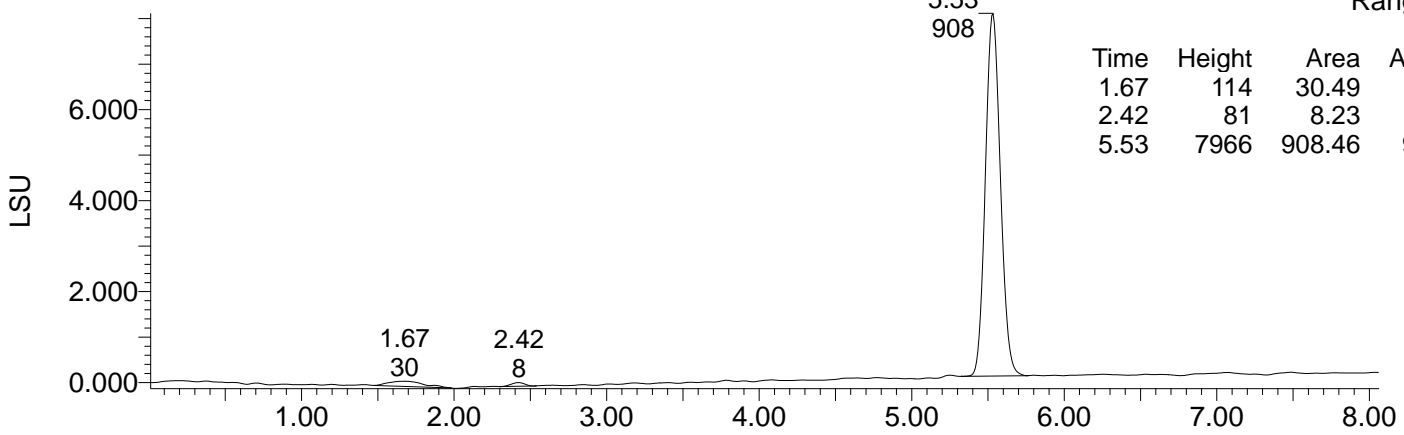

(2) ELSD Signal

Range: 8

| Time | Height | Area   | Area% |
|------|--------|--------|-------|
| 1.67 | 114    | 30.49  | 3.22  |
| 2.42 | 81     | 8.23   | 0.87  |
| 5.53 | 7966   | 908.46 | 95.91 |

PKS2251

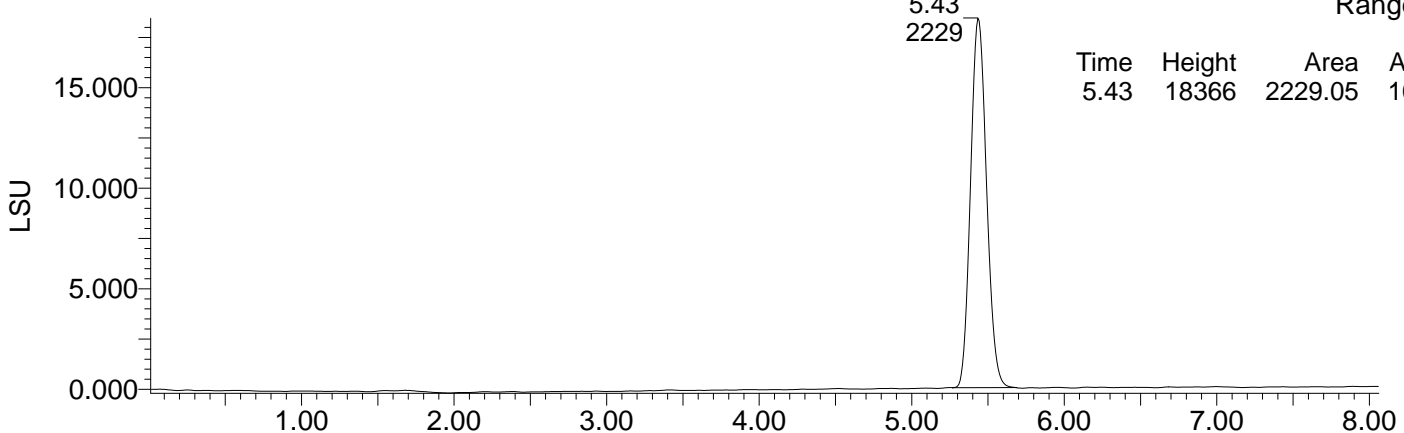

(2) ELSD Signal

Range: 19

| Time | Height | Area    | Area%  |
|------|--------|---------|--------|
| 5.43 | 18366  | 2229.05 | 100.00 |

PKS2249

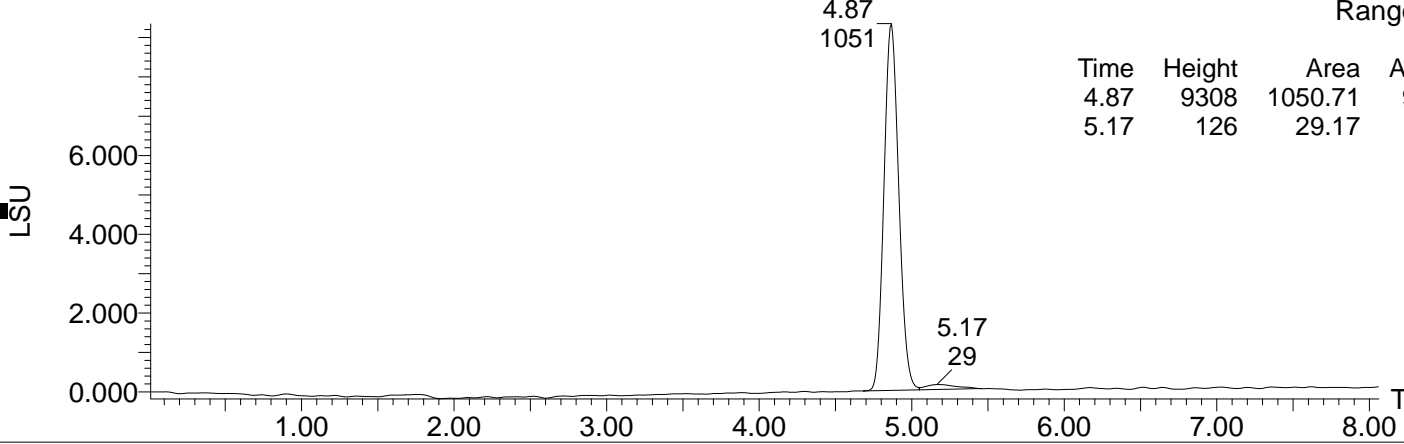

(2) ELSD Signal

Range: 10

| Time | Height | Area    | Area% |
|------|--------|---------|-------|
| 4.87 | 9308   | 1050.71 | 97.30 |
| 5.17 | 126    | 29.17   | 2.70  |

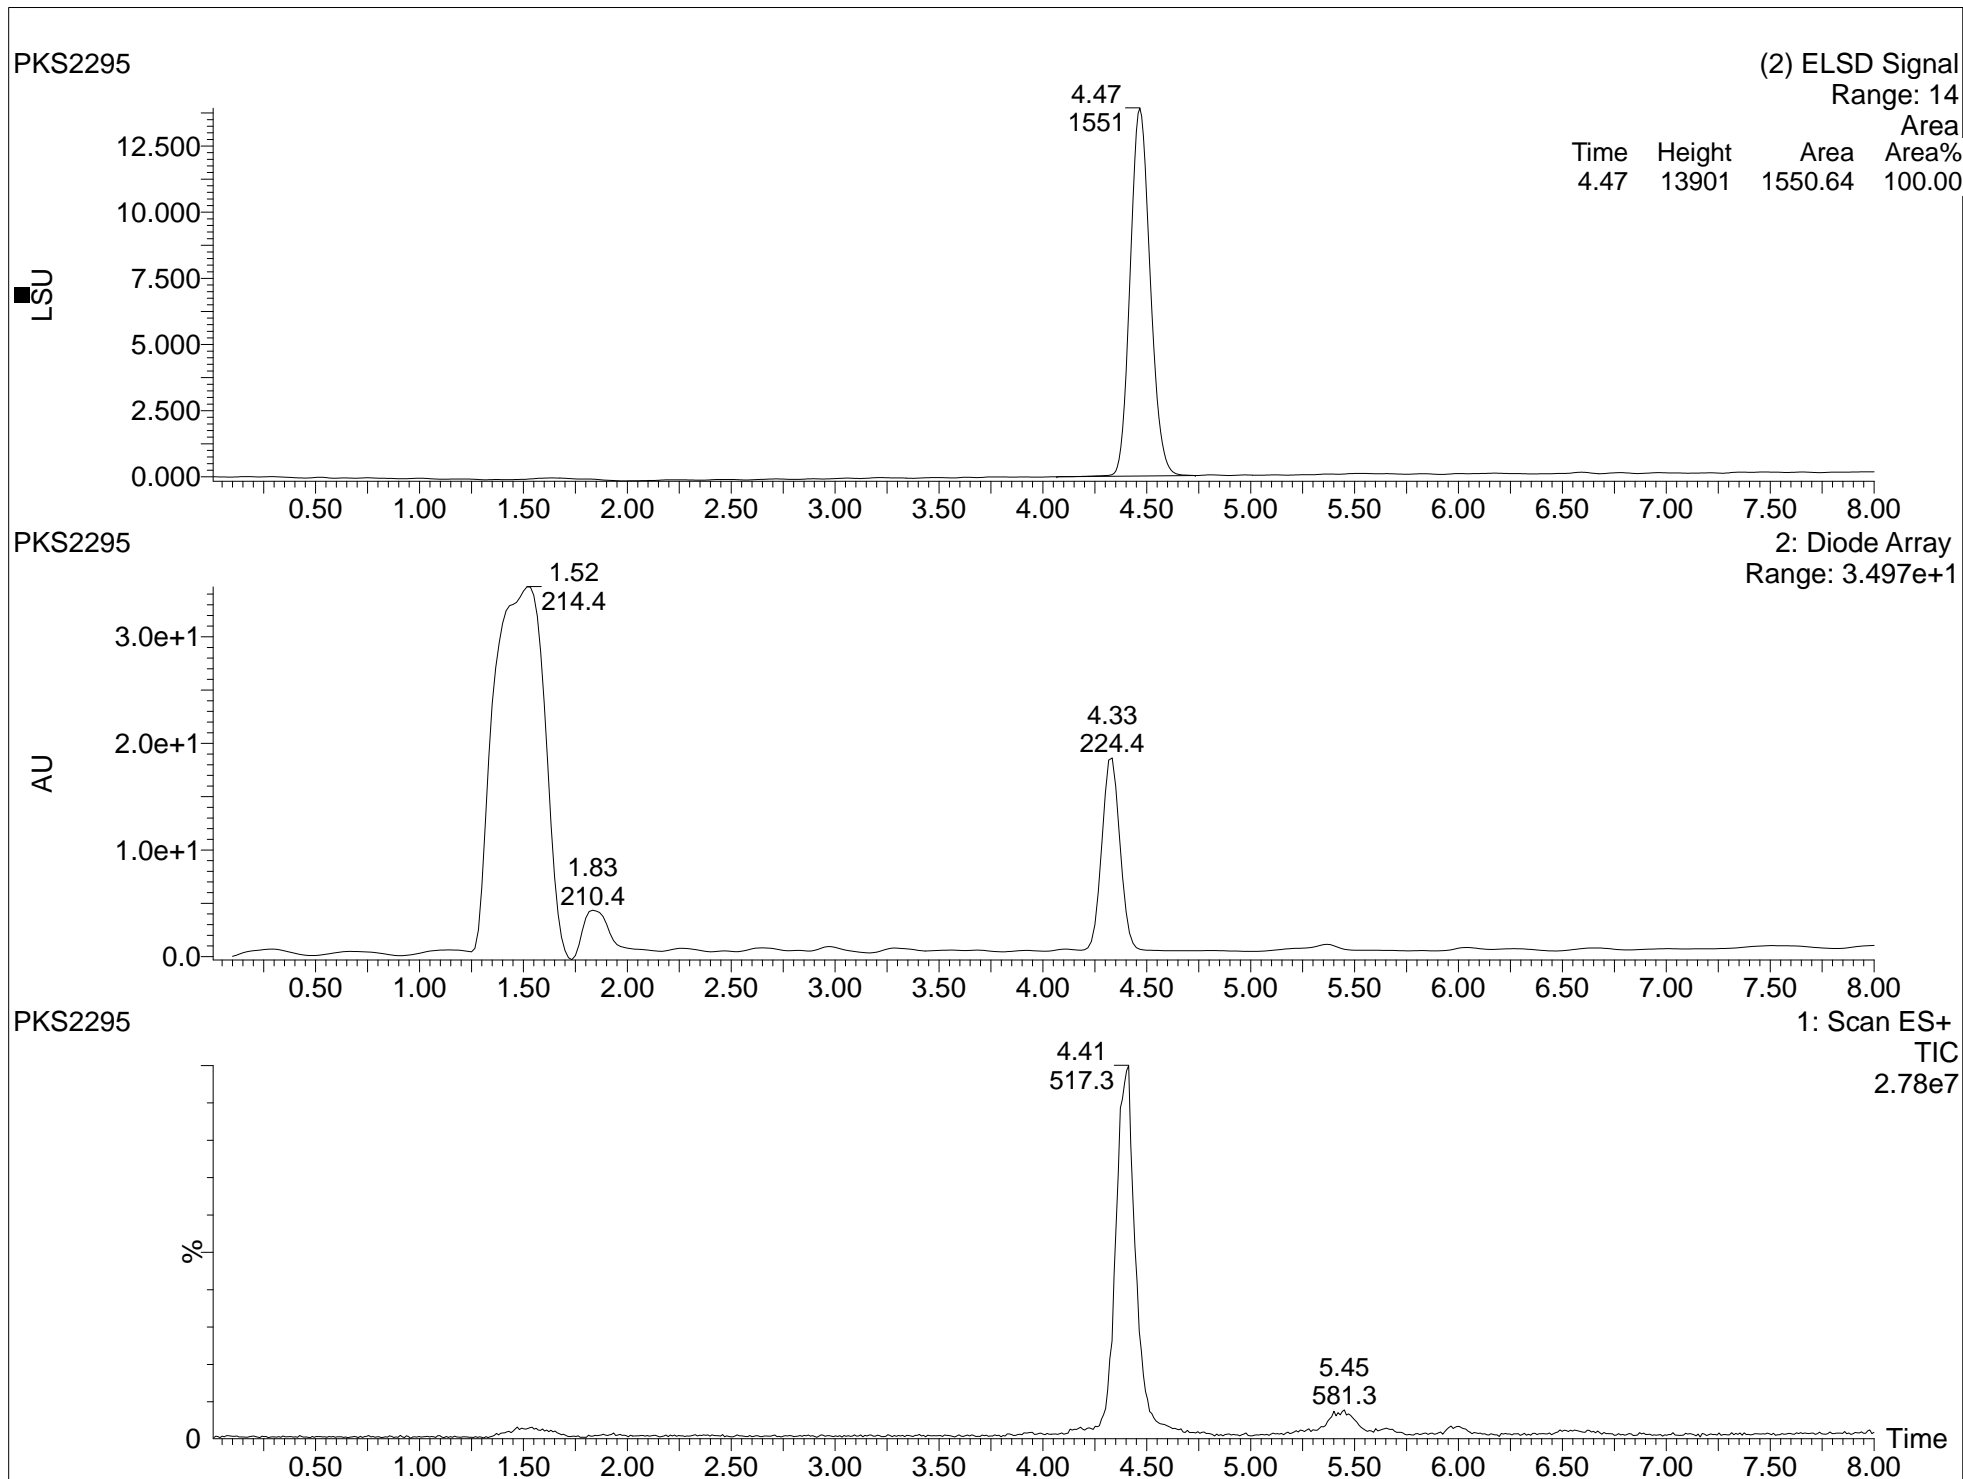

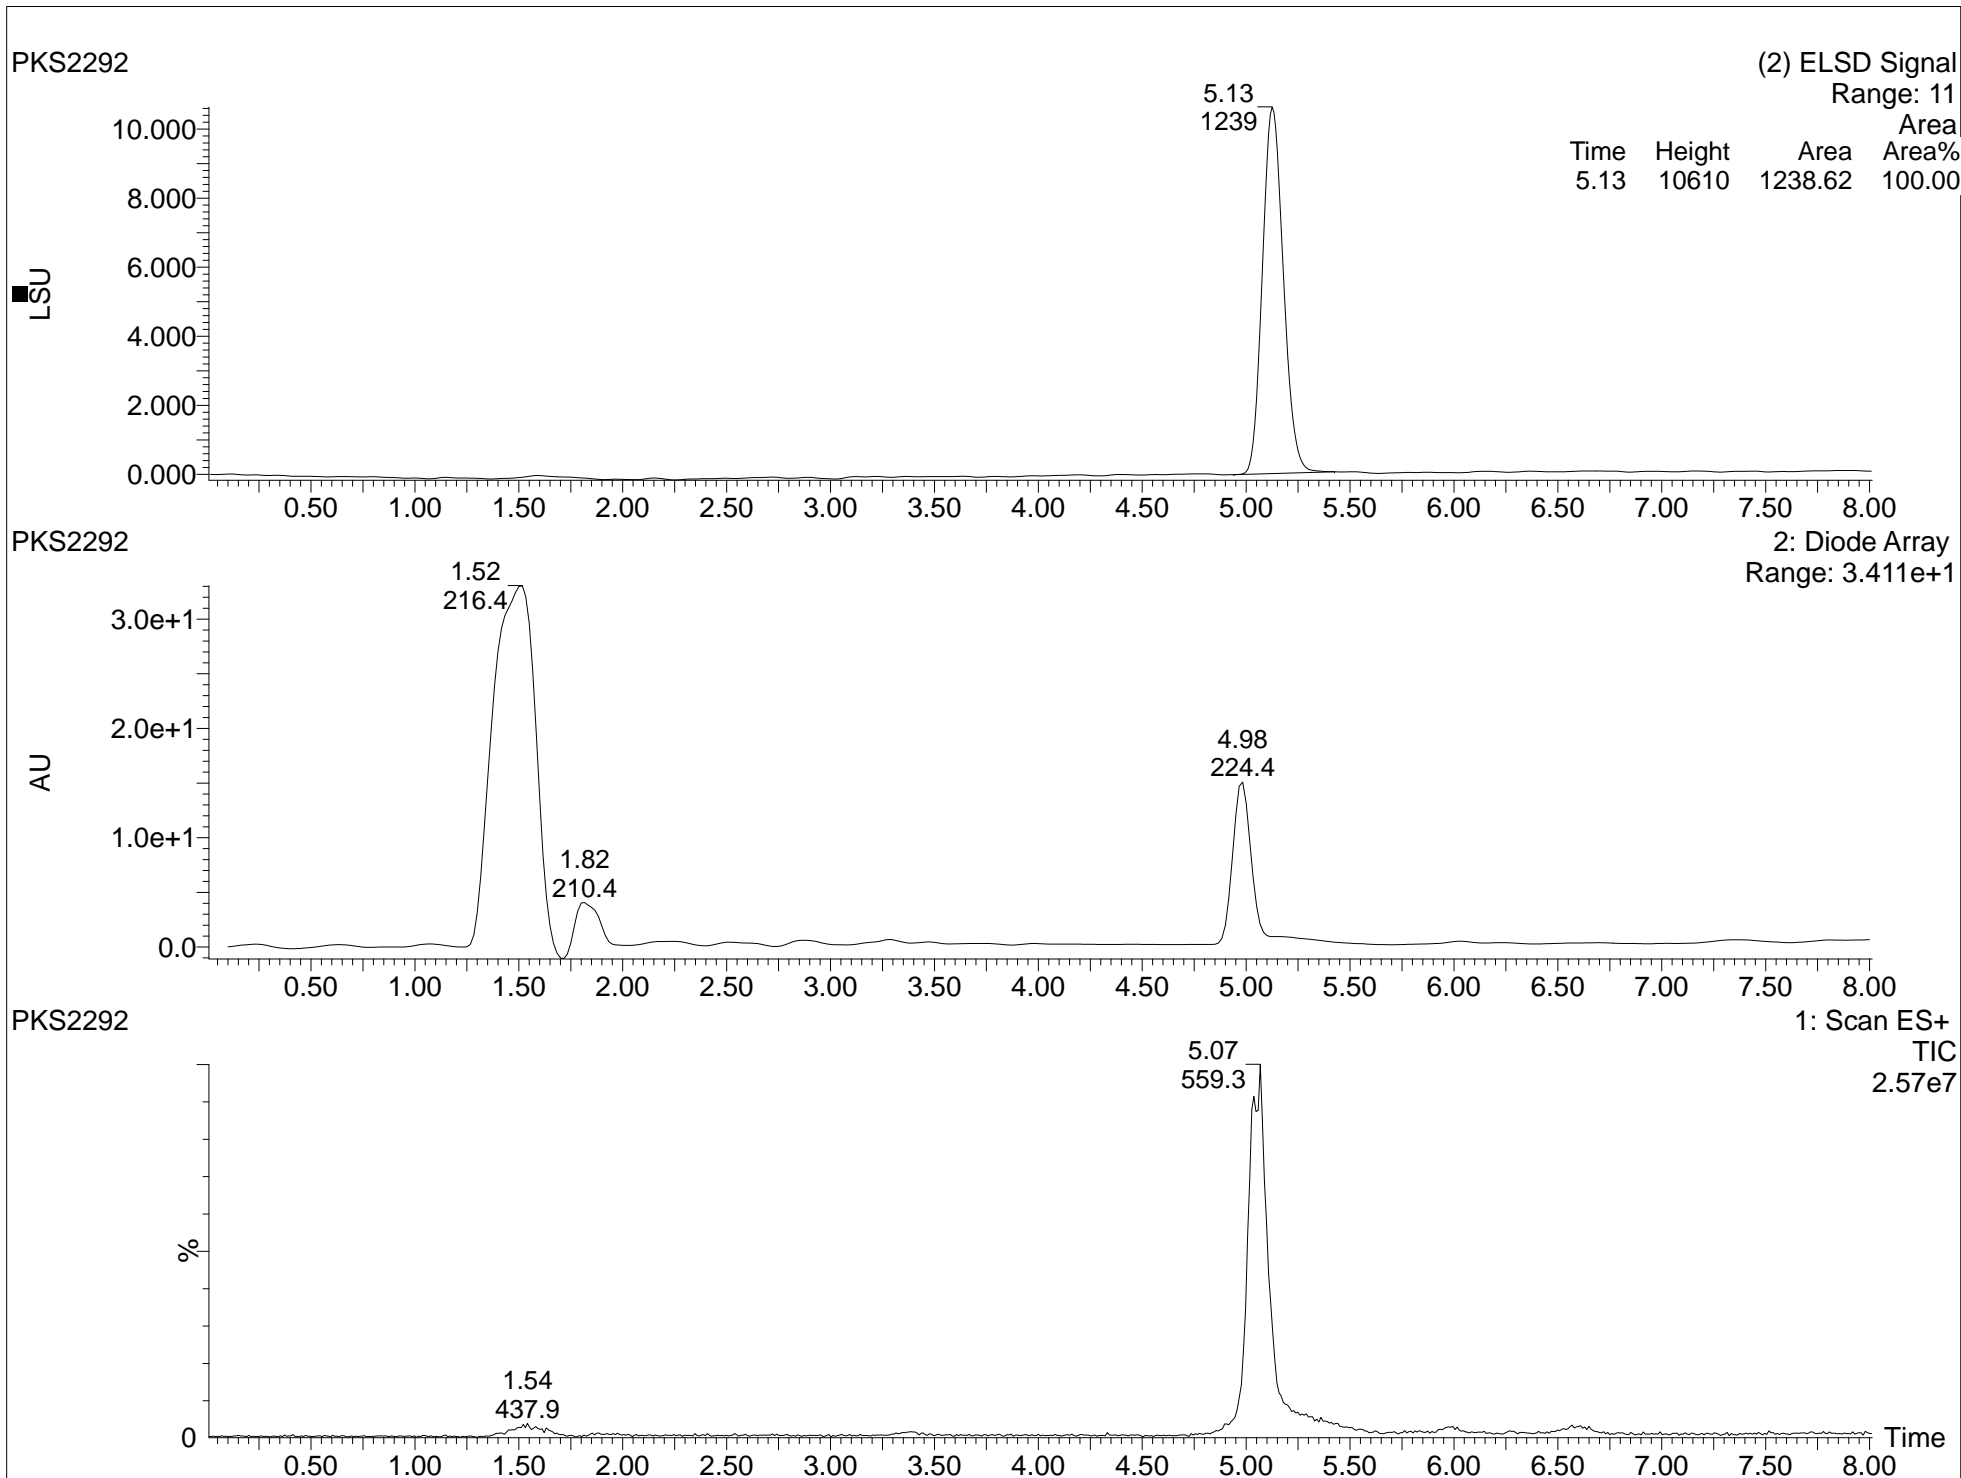



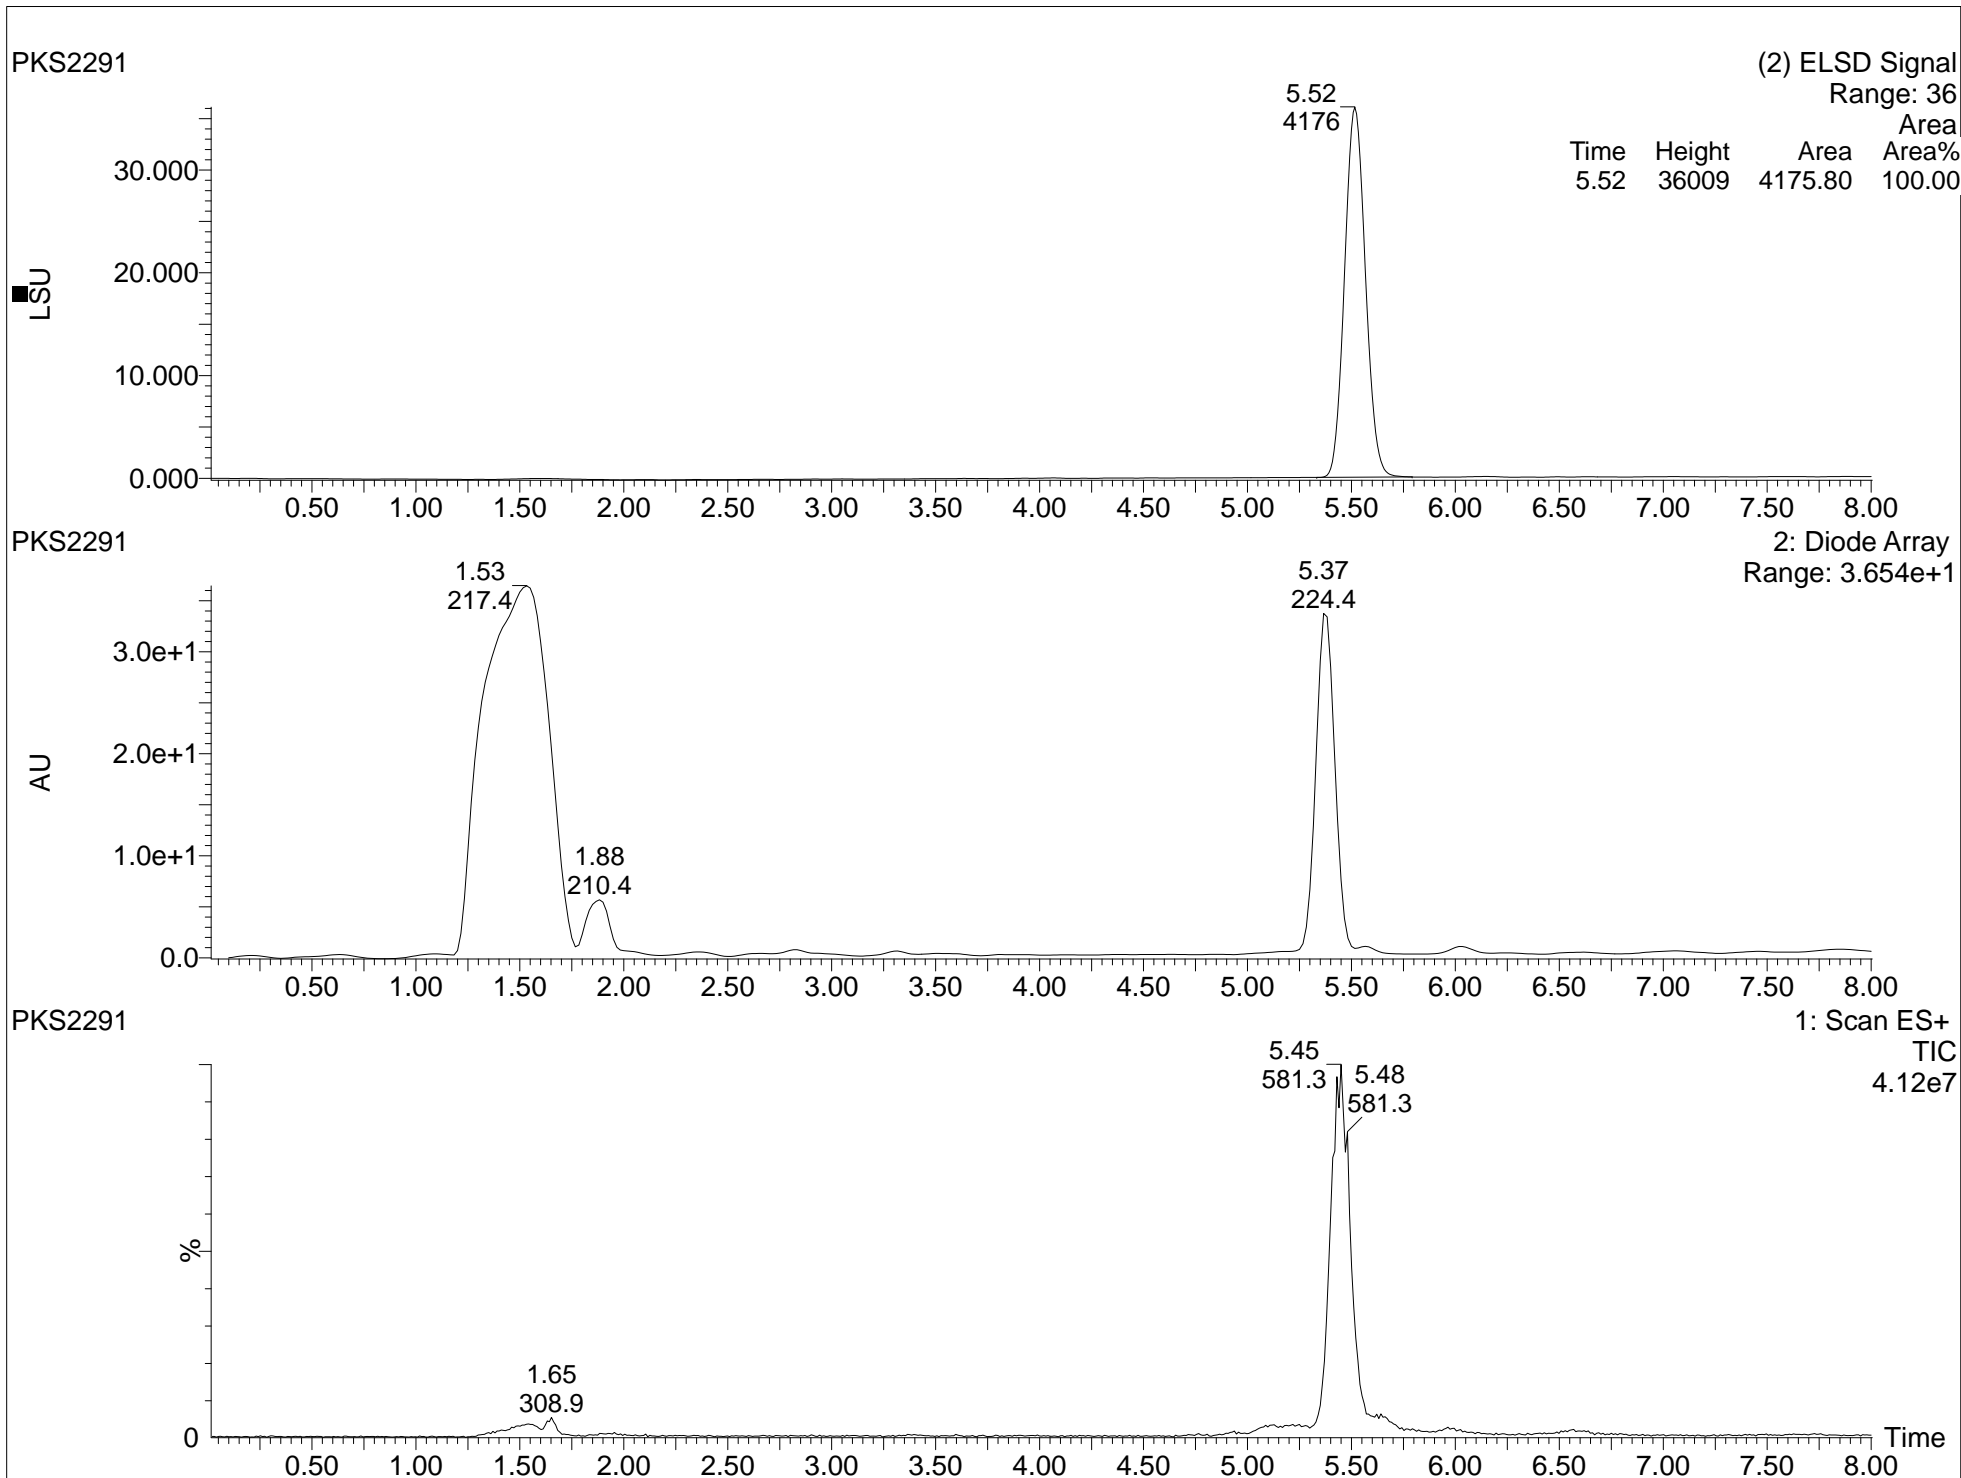

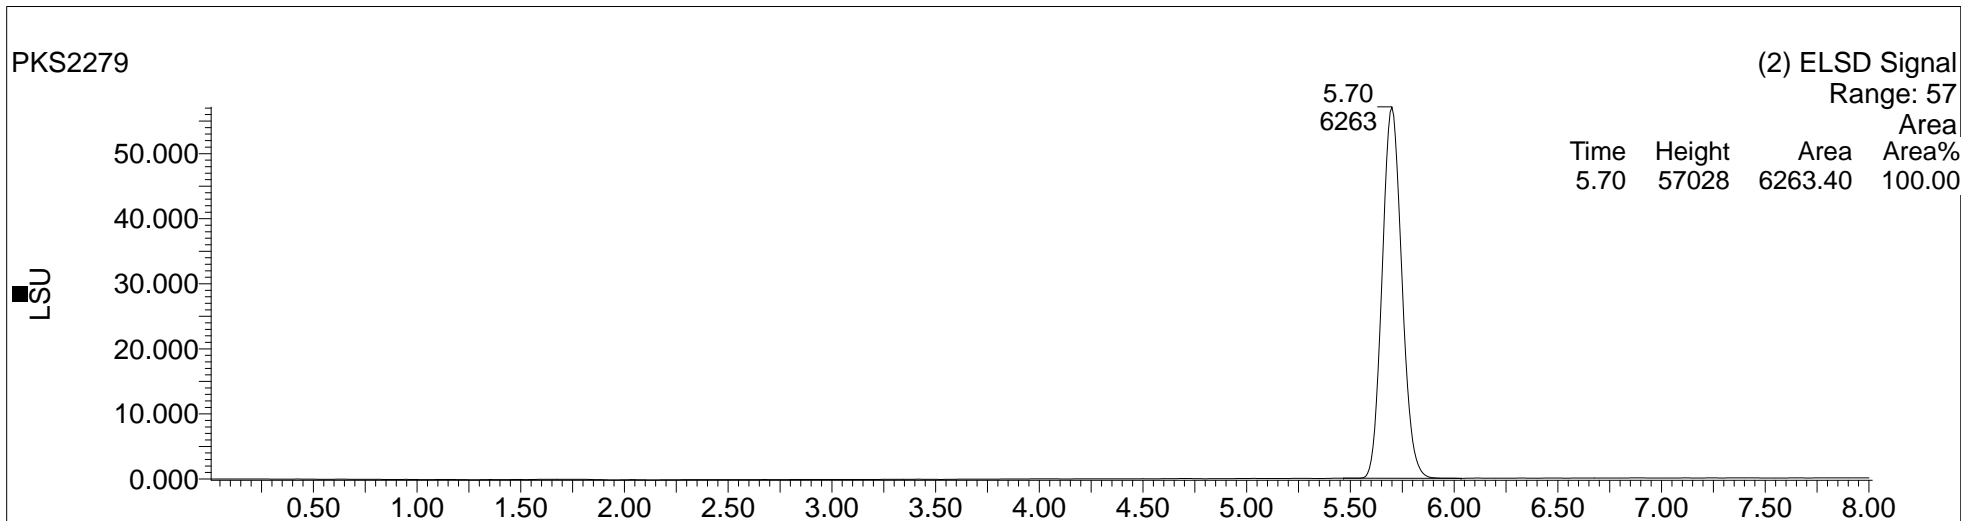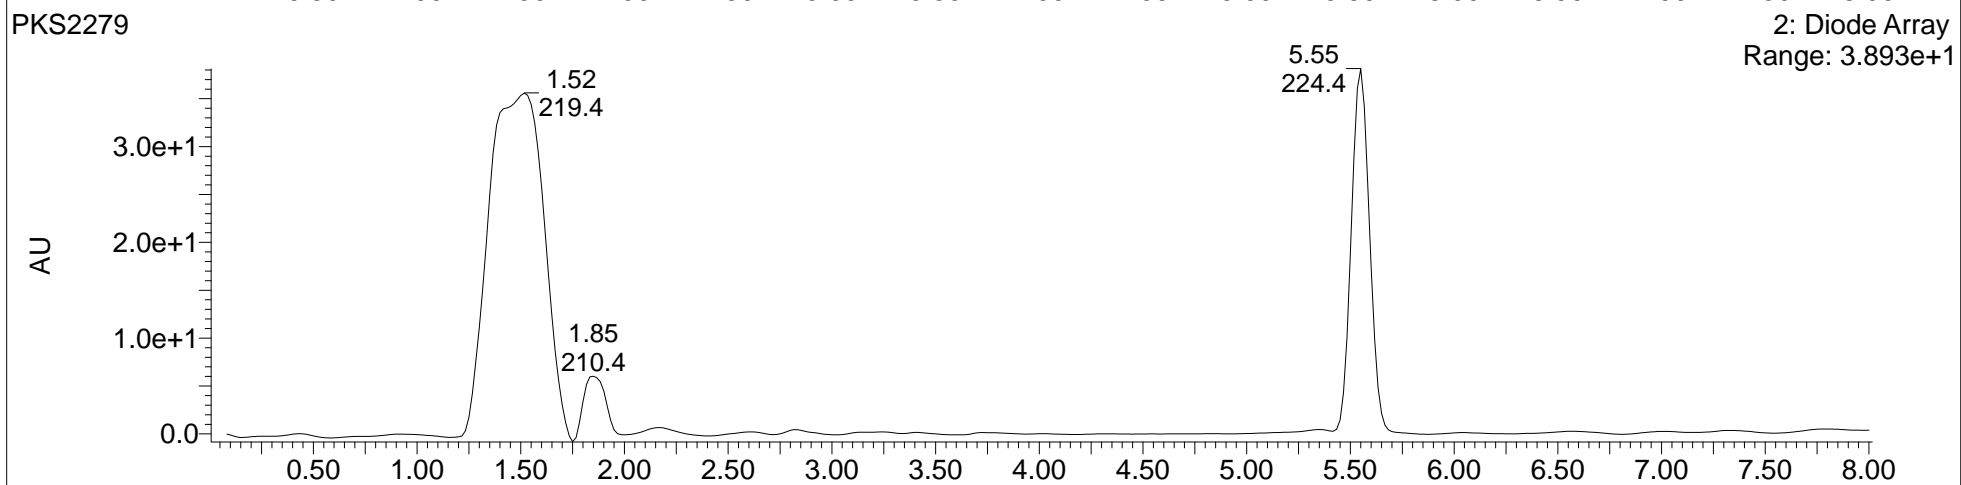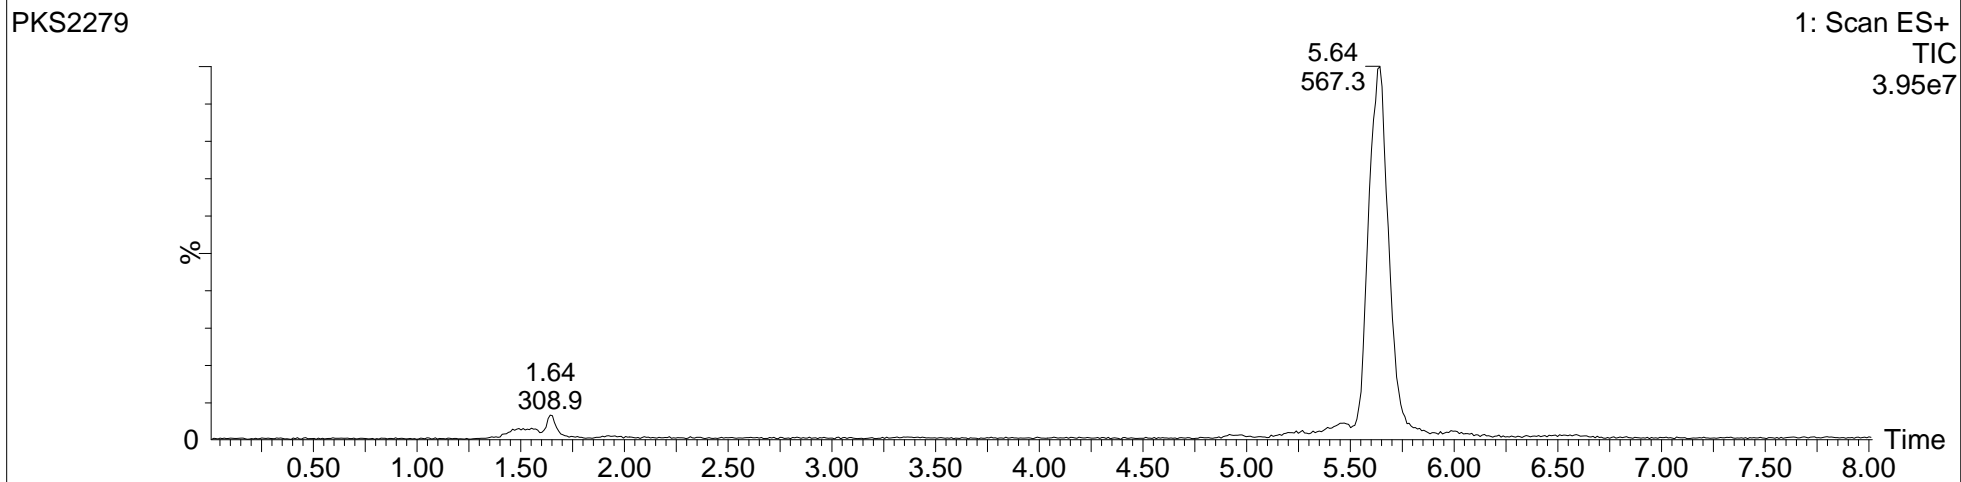

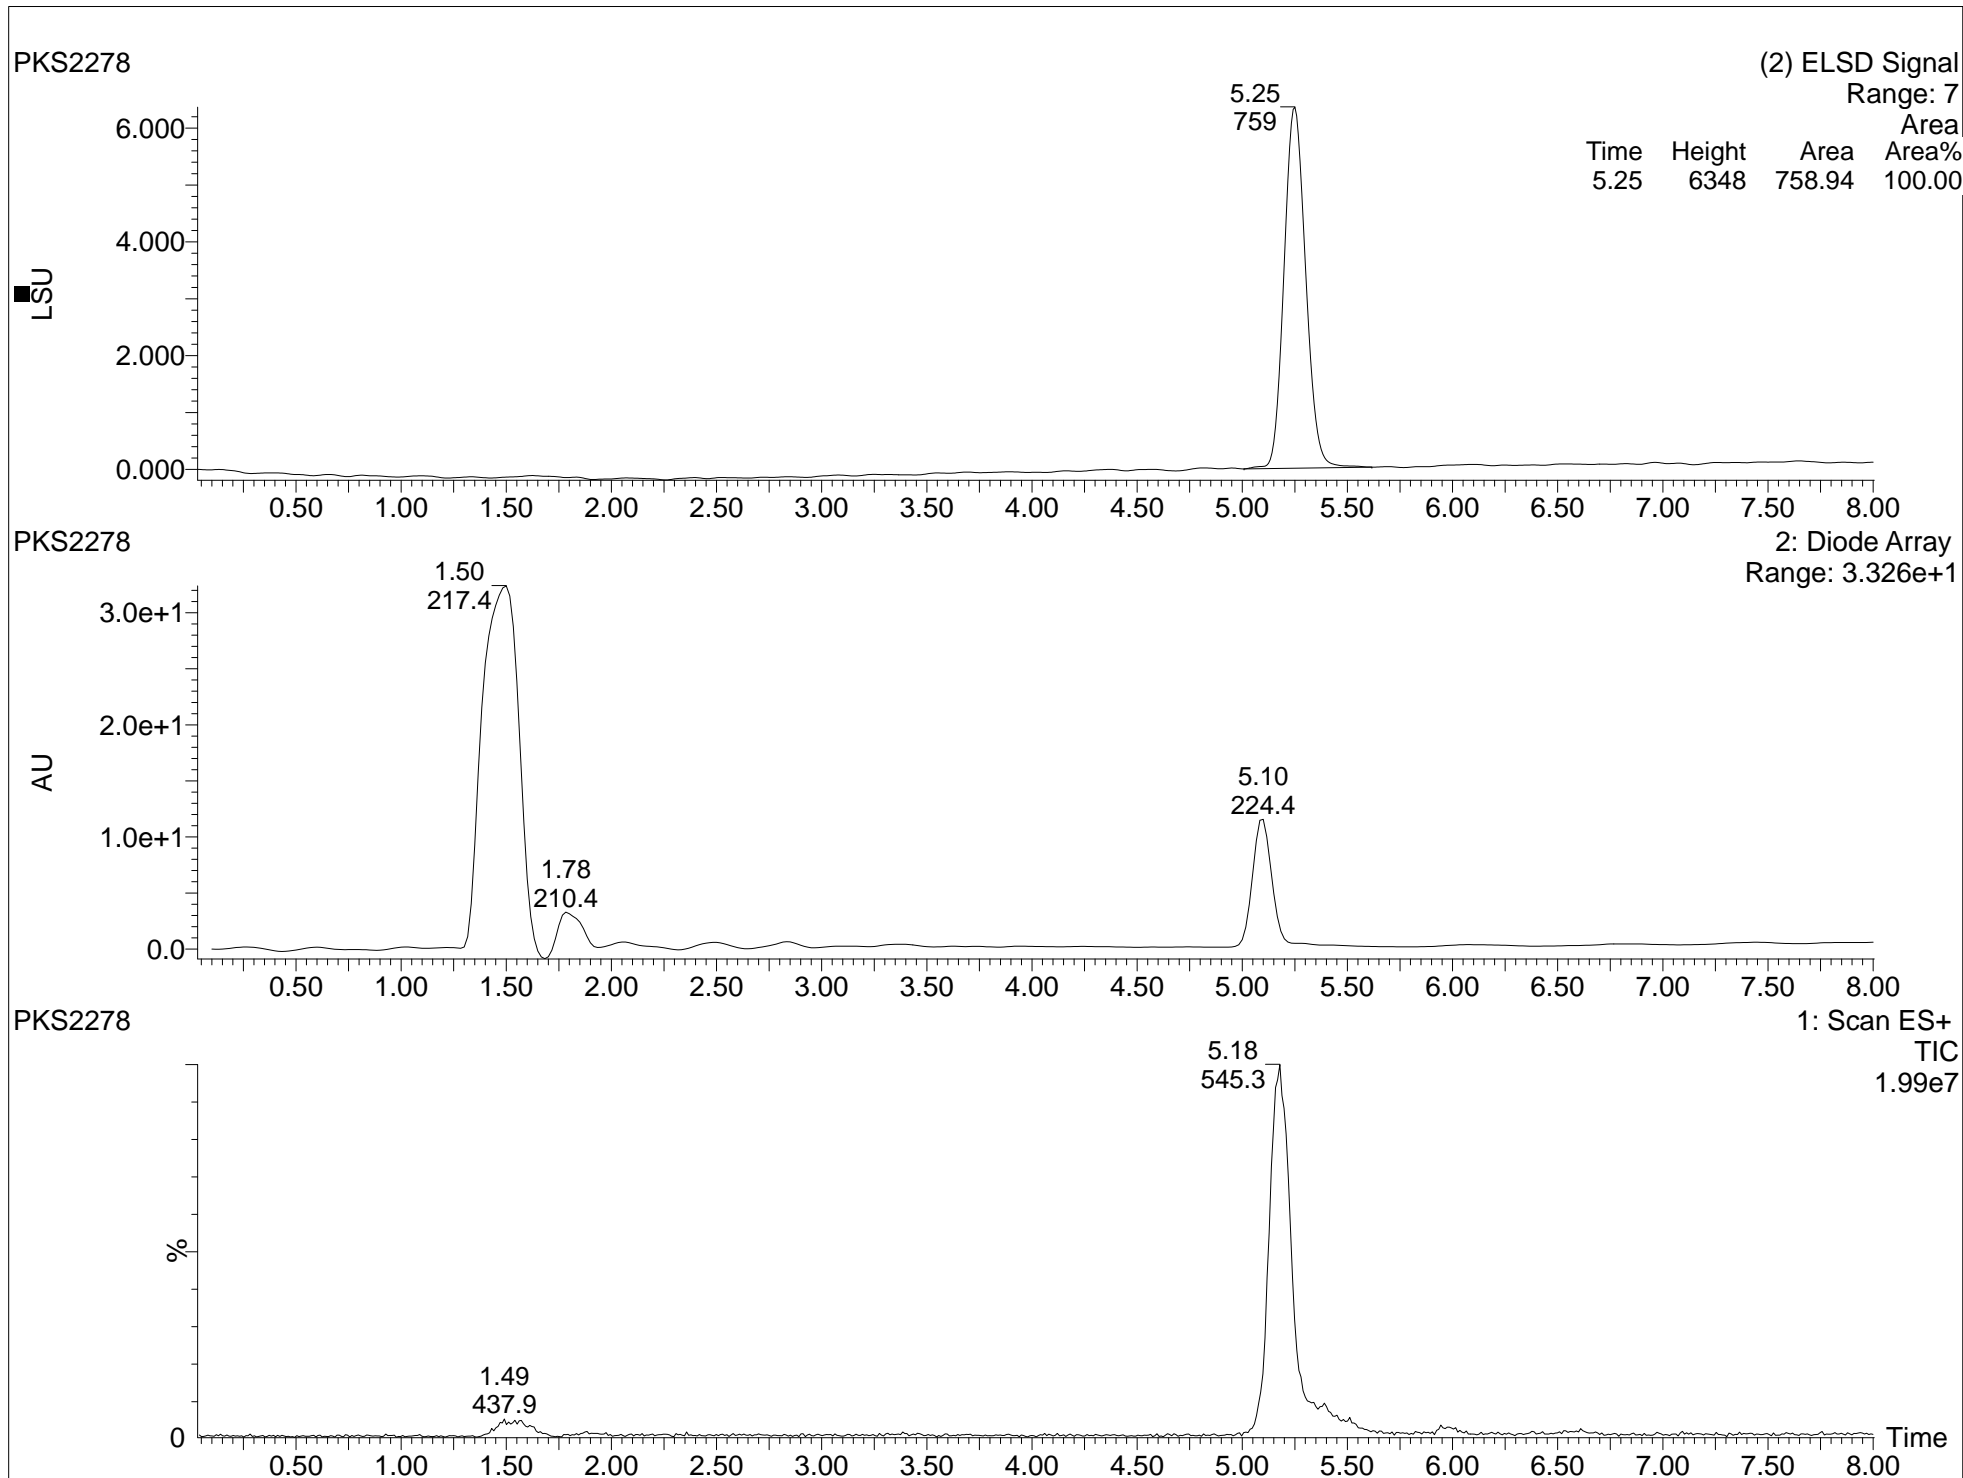

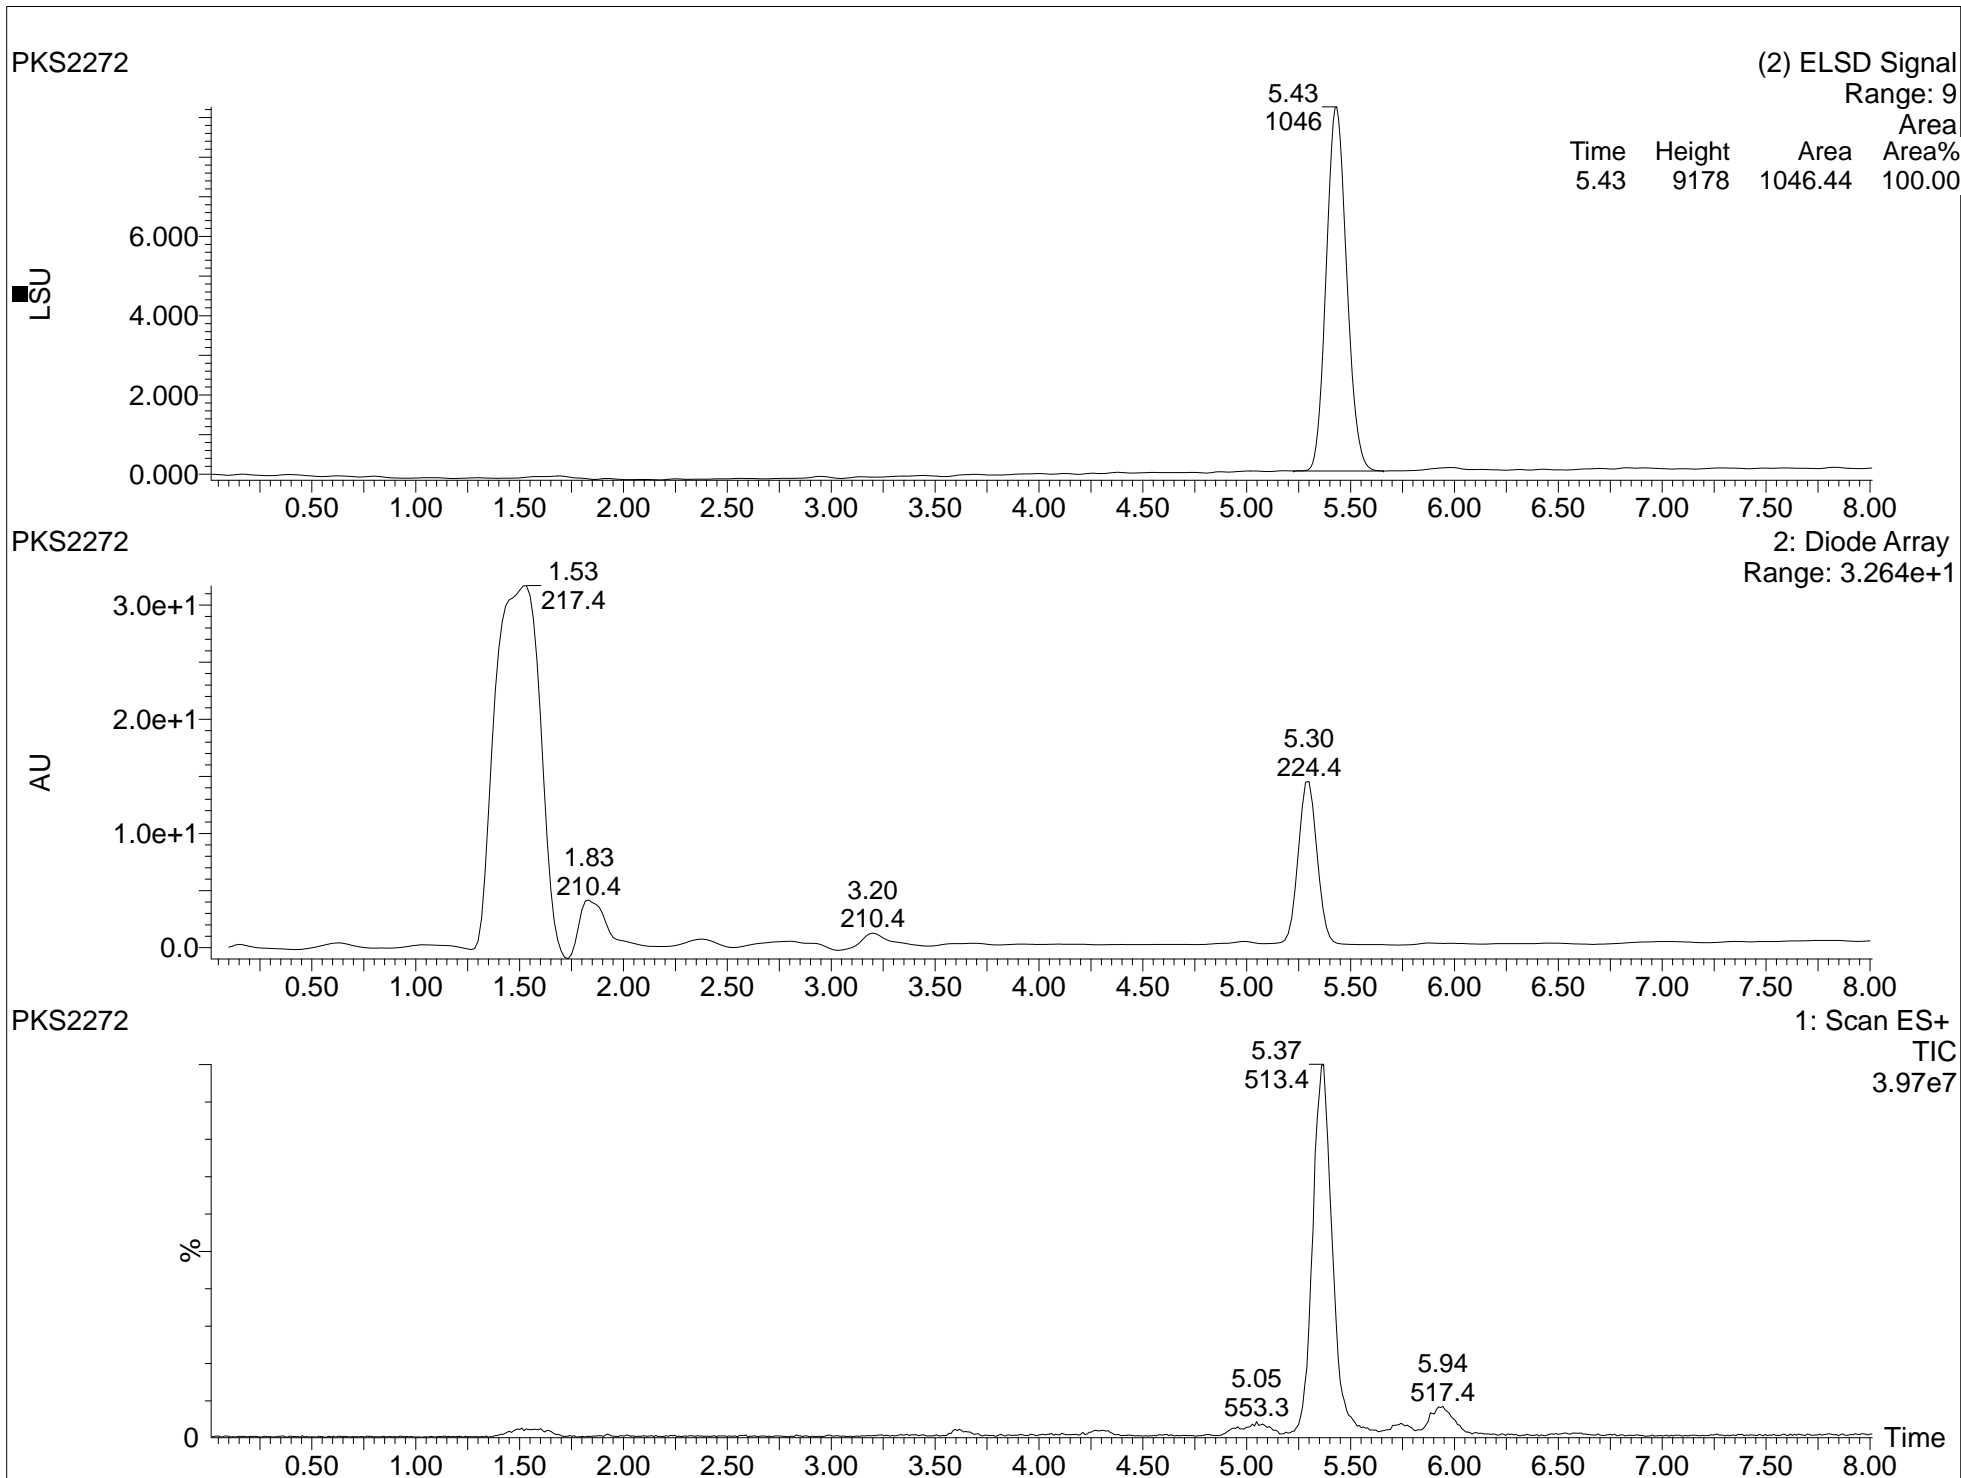

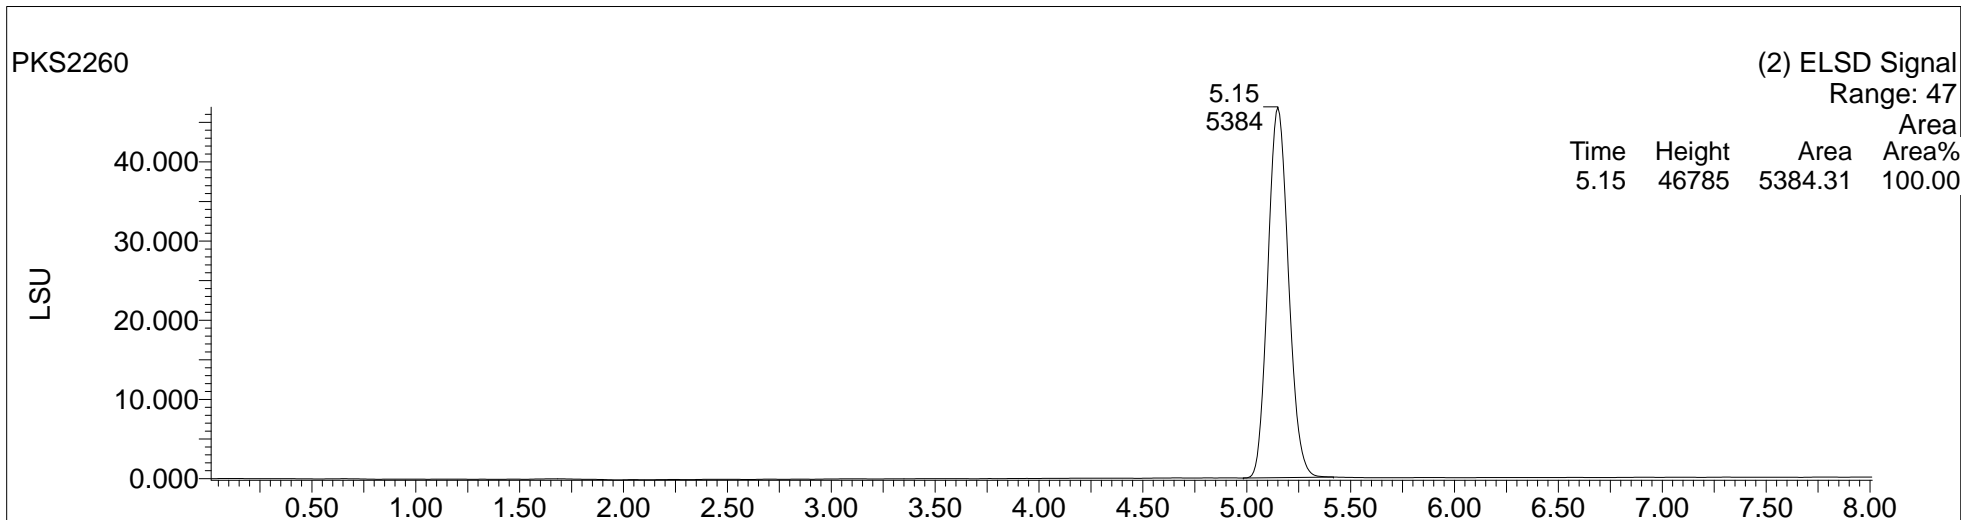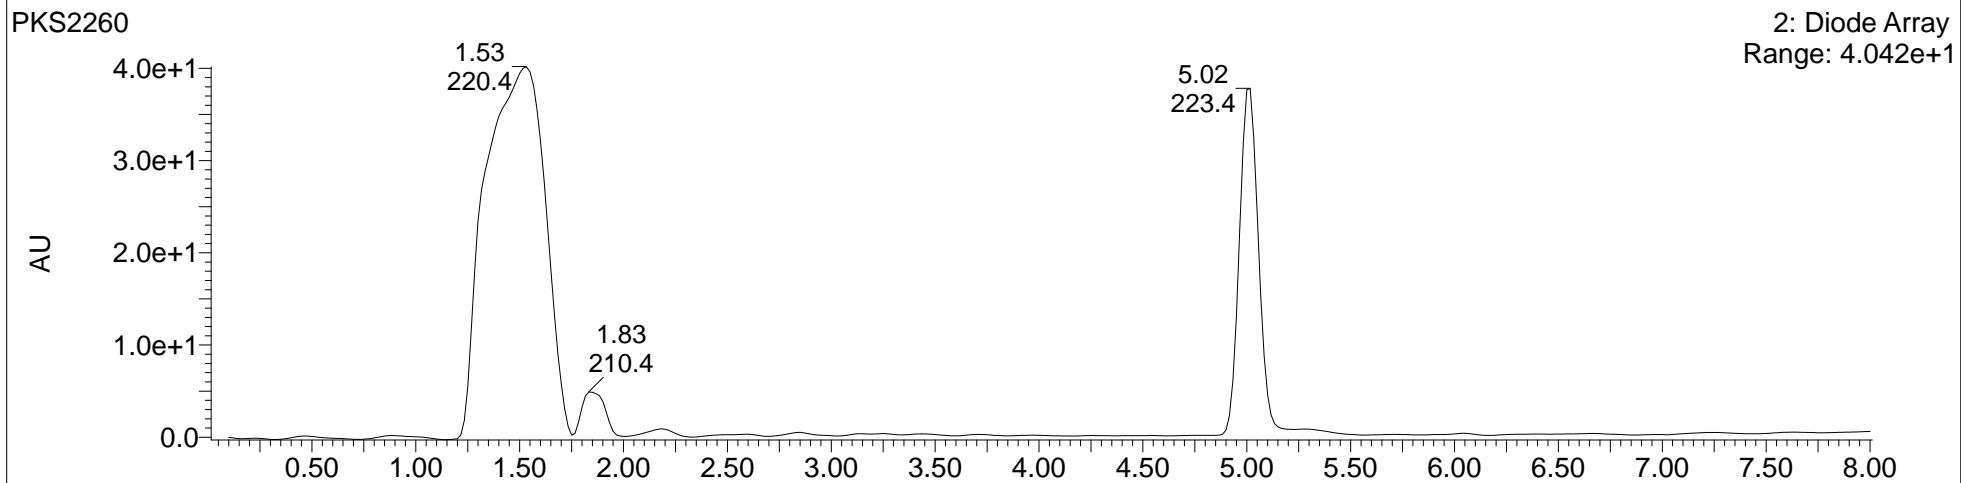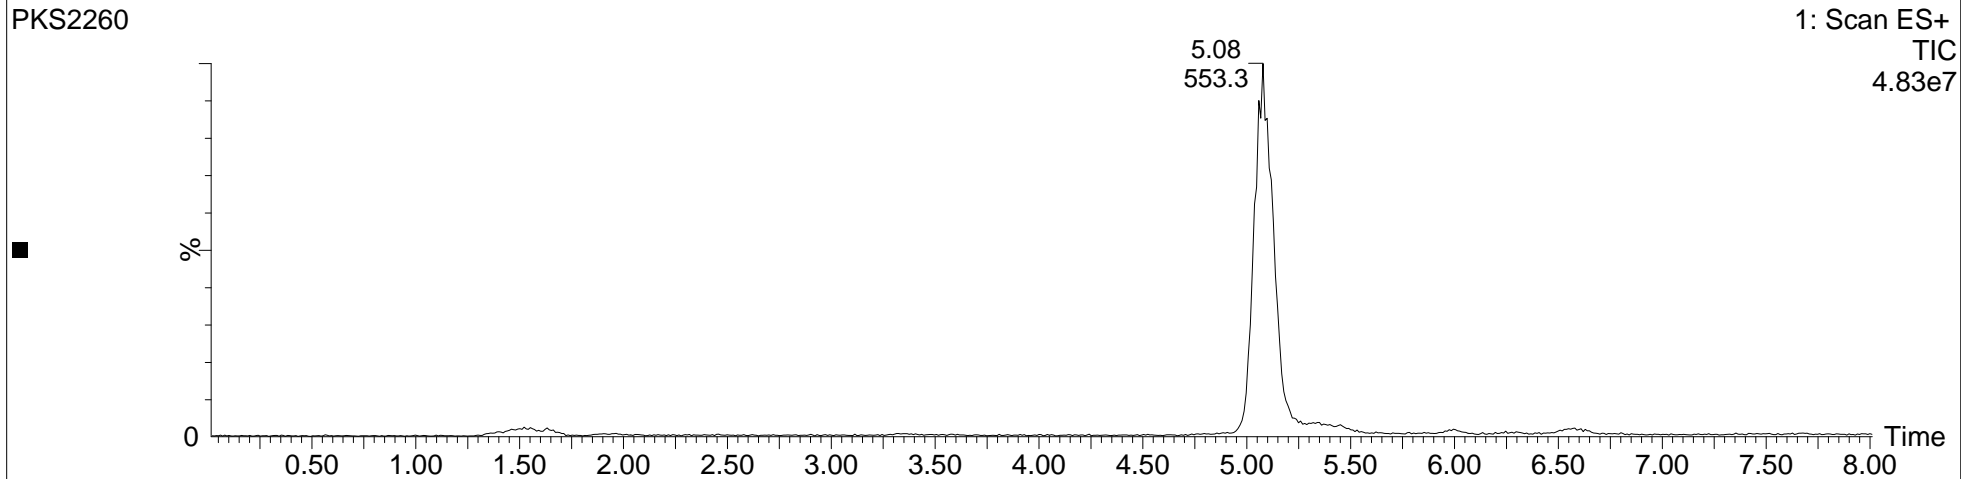

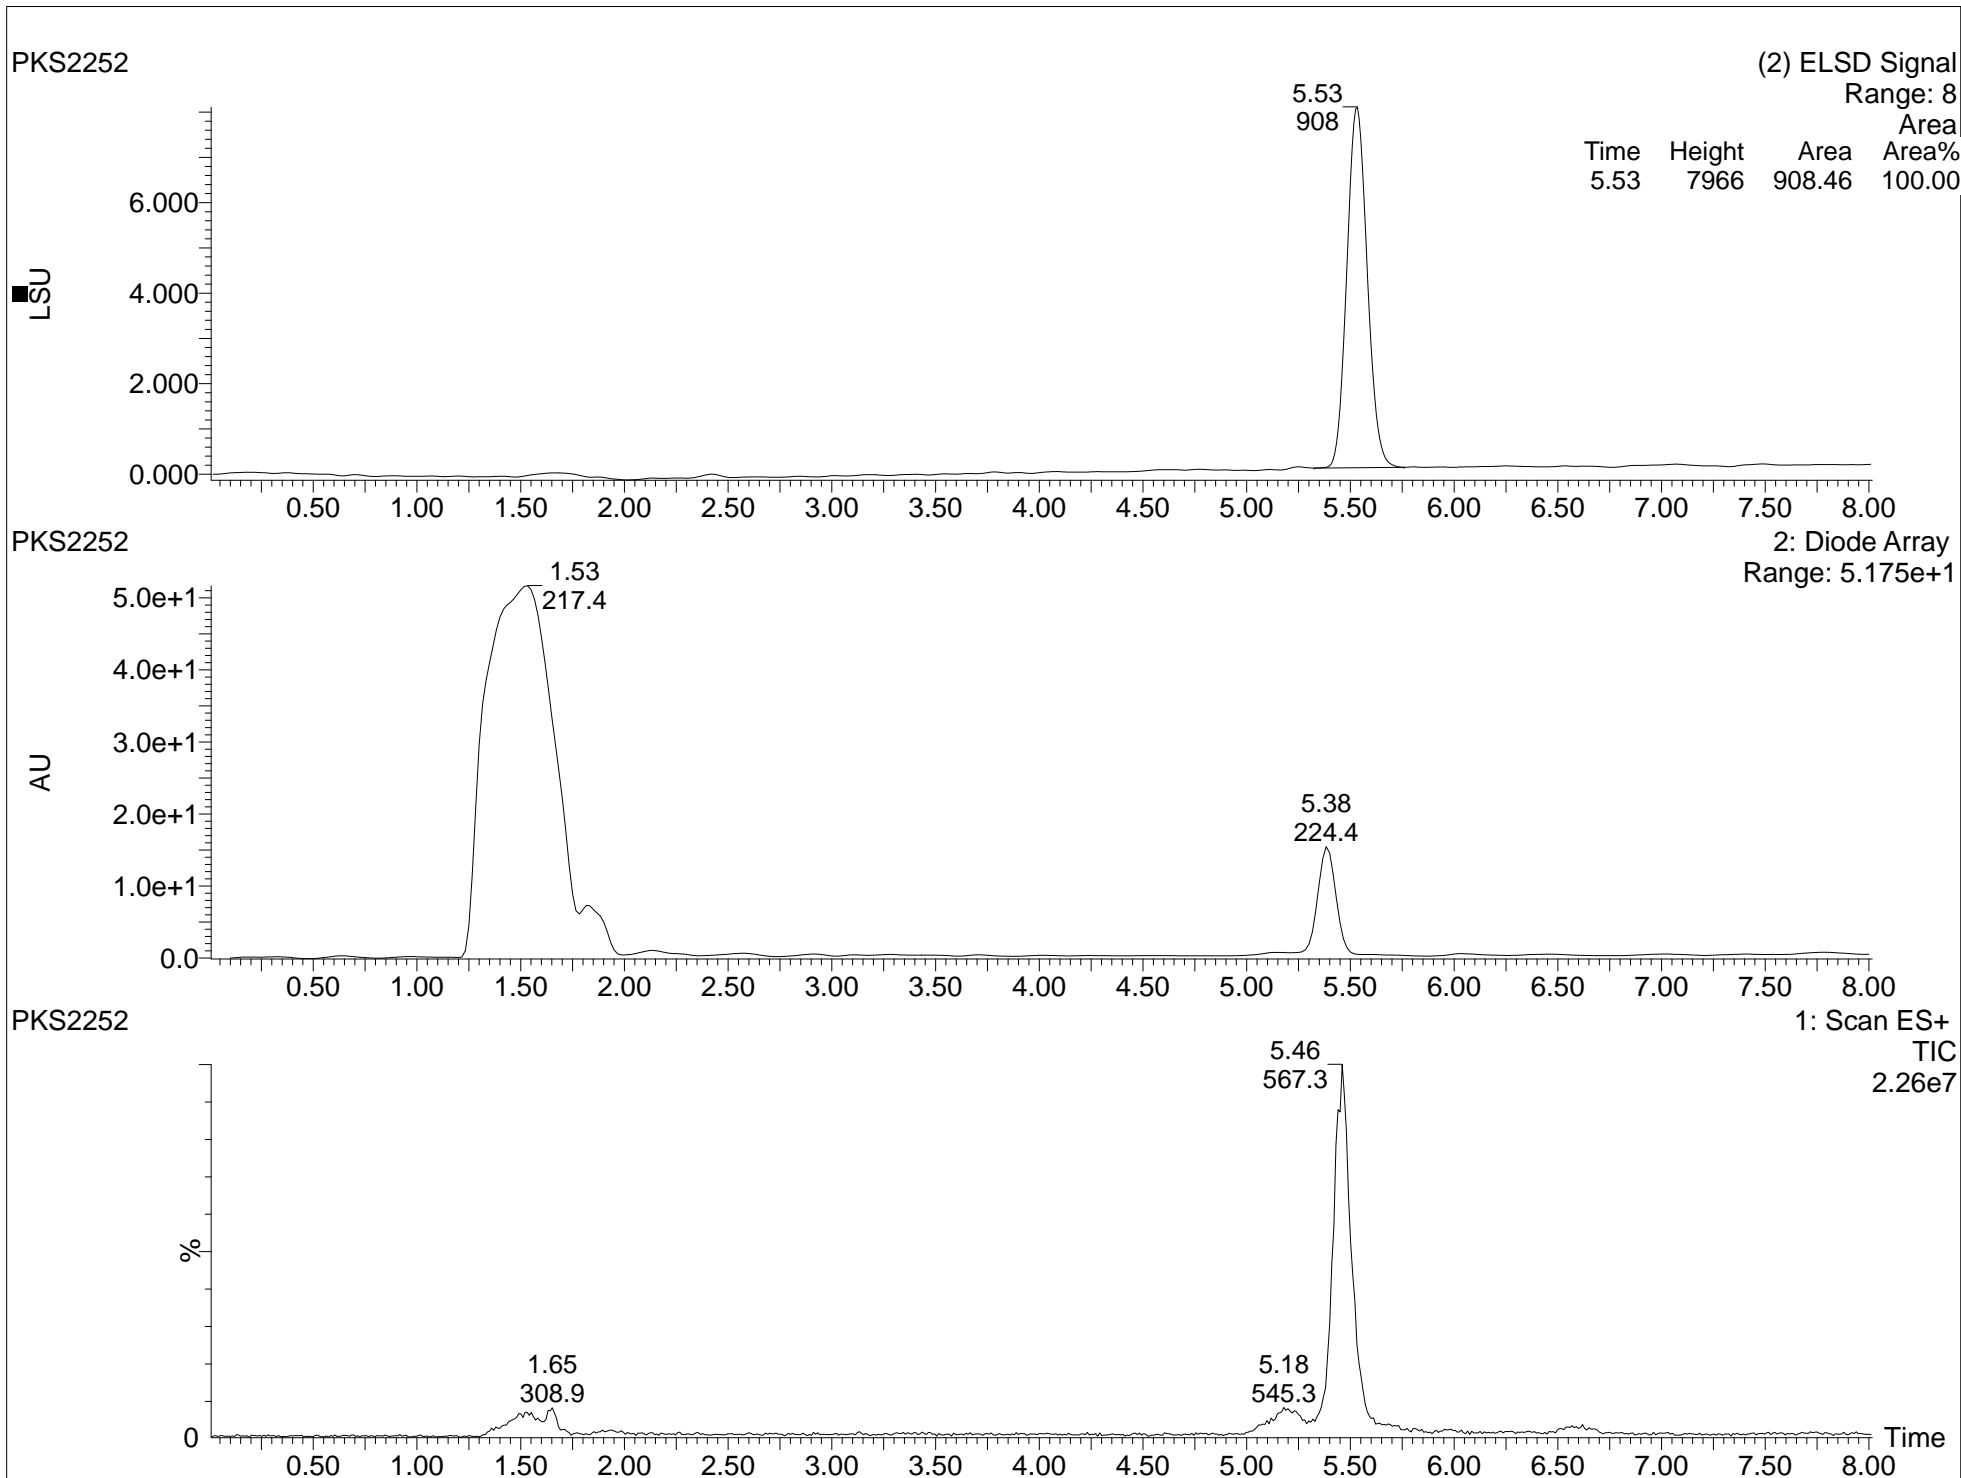

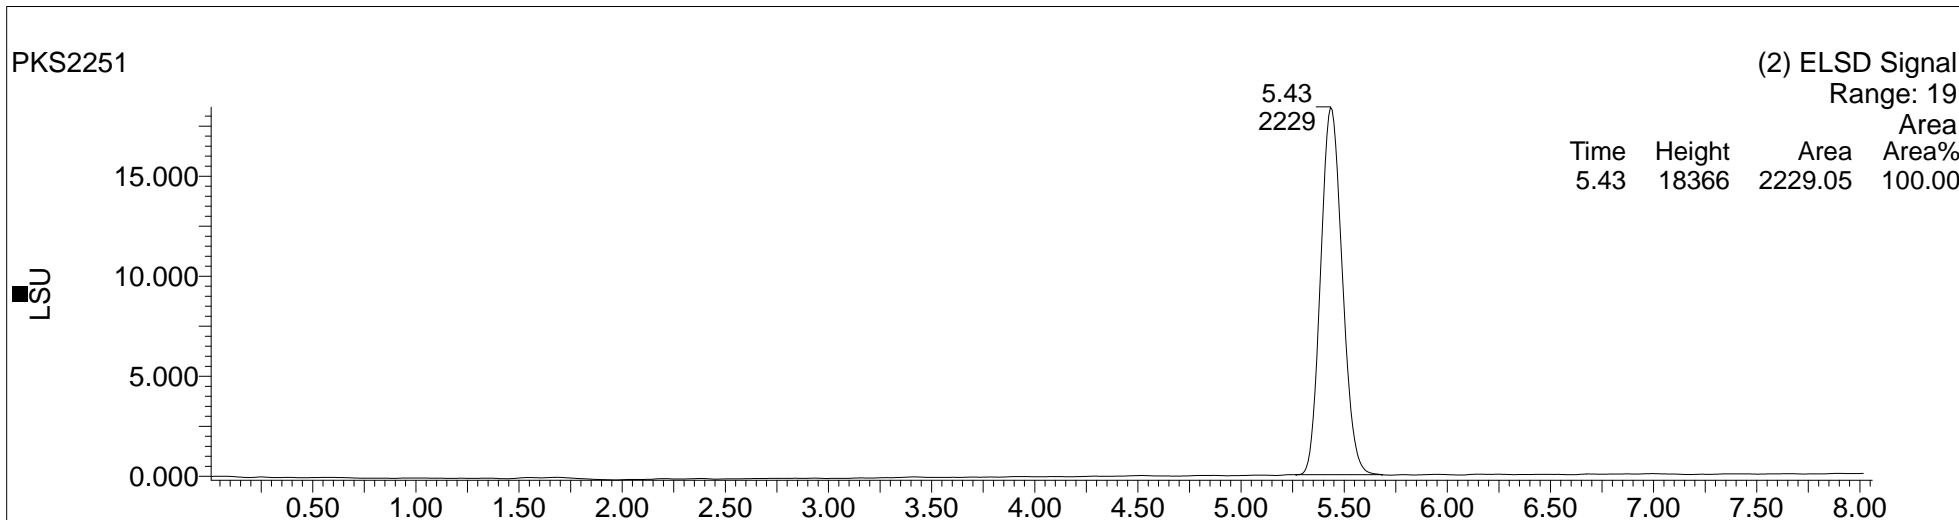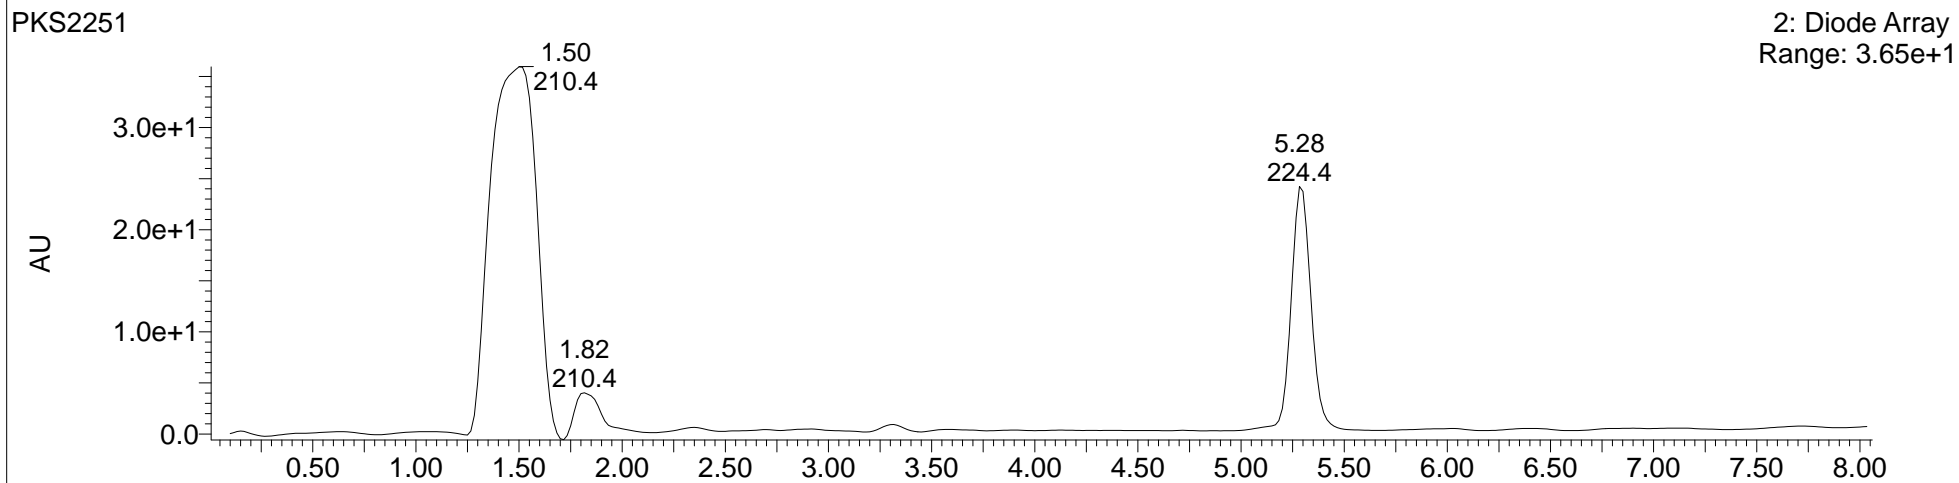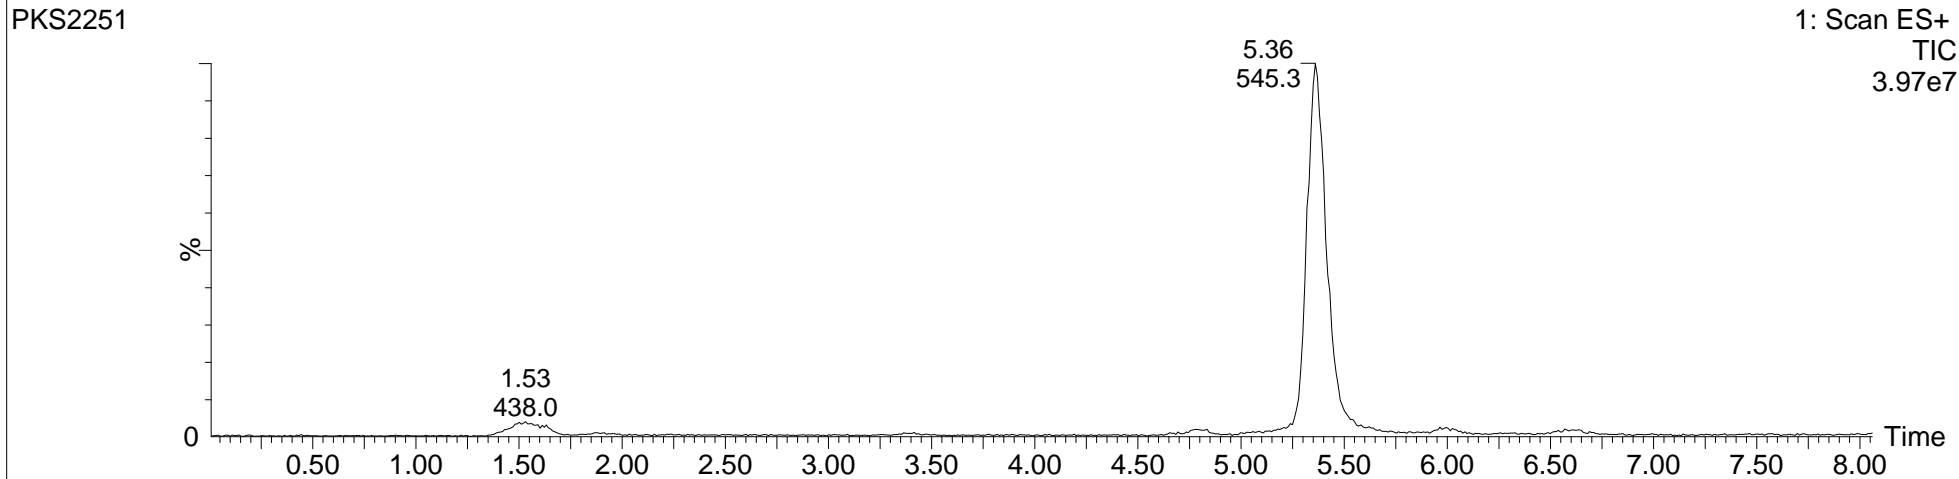

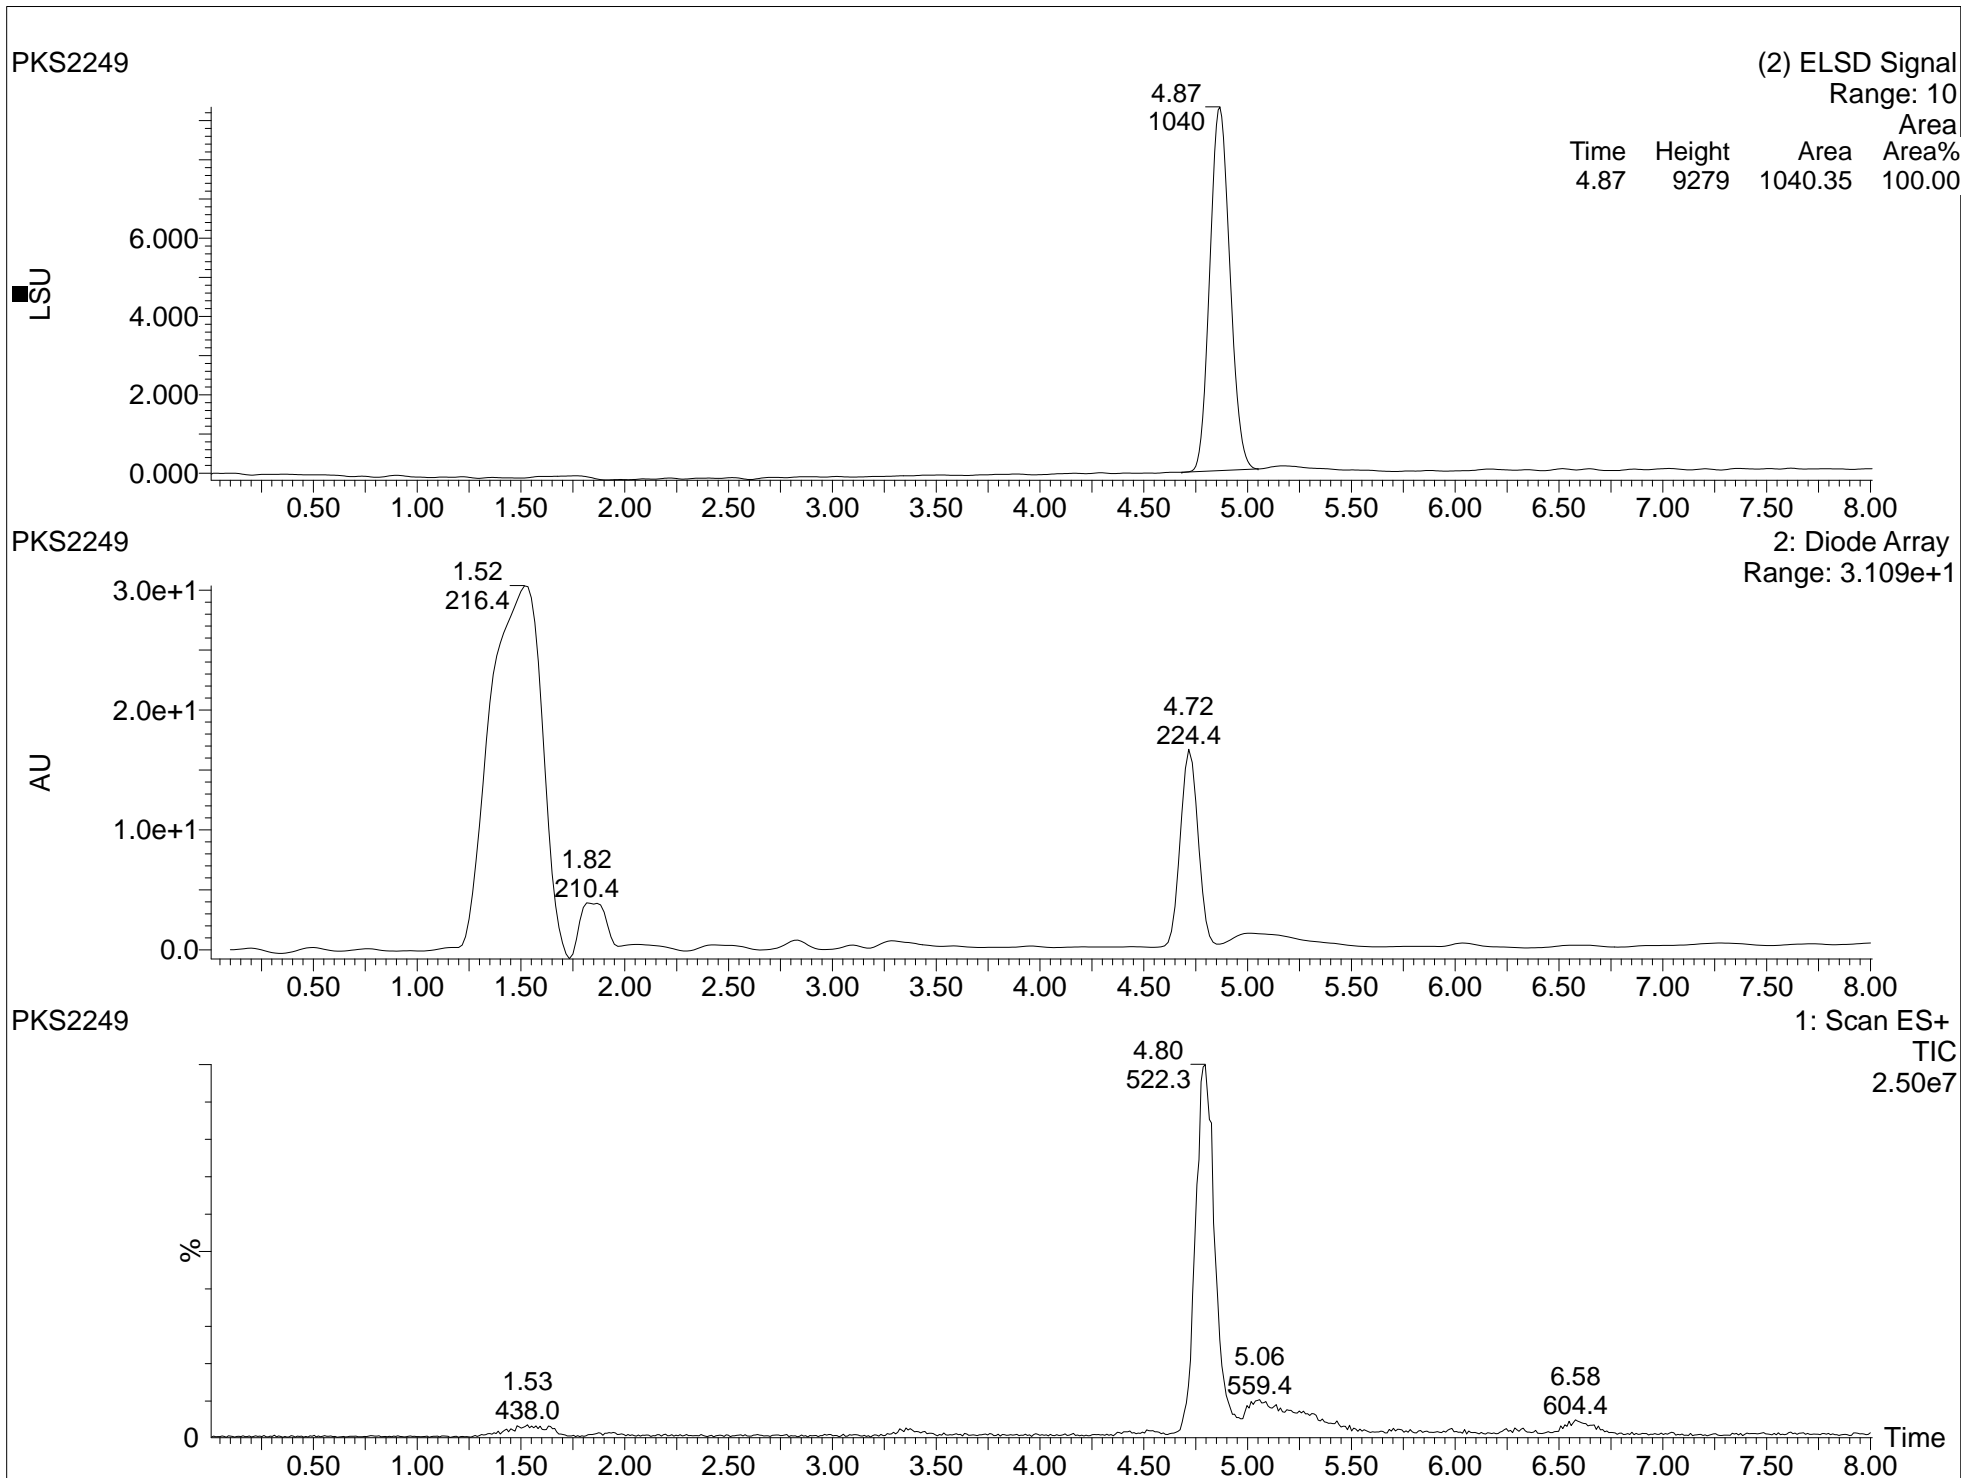



PKS3054

(2) ELSD Signal  
Range: 16

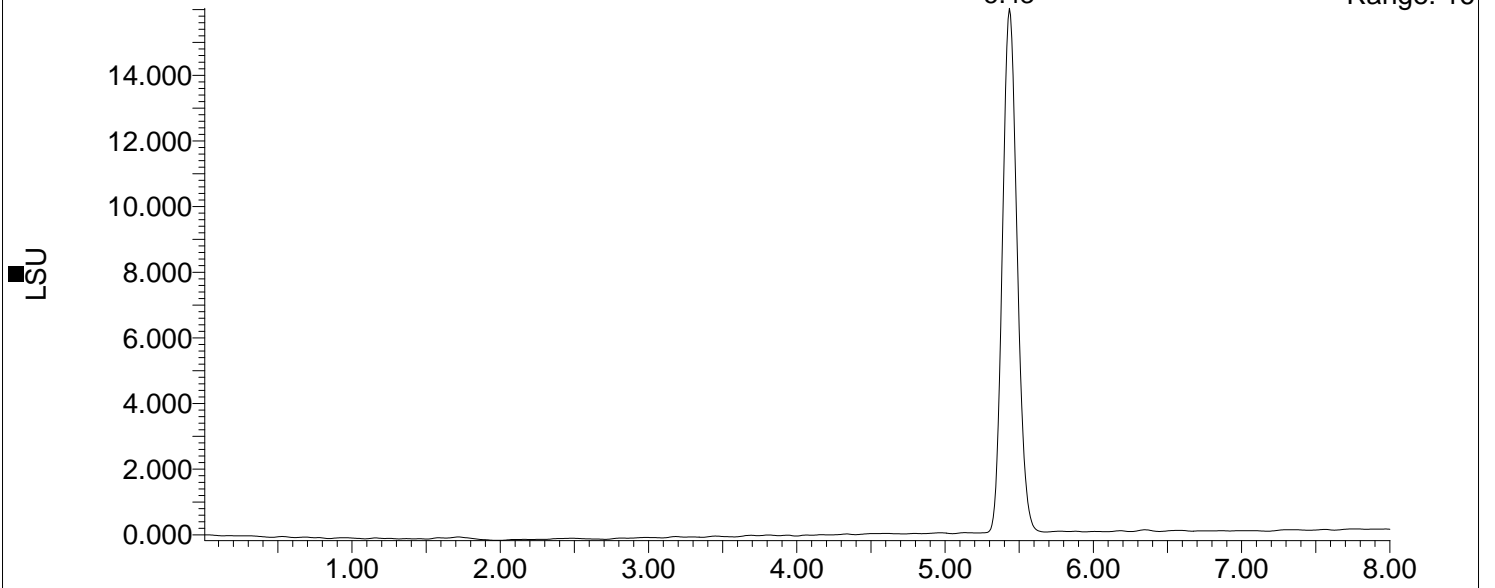

PKS3054

2: Diode Array  
Range: 3.373e+1

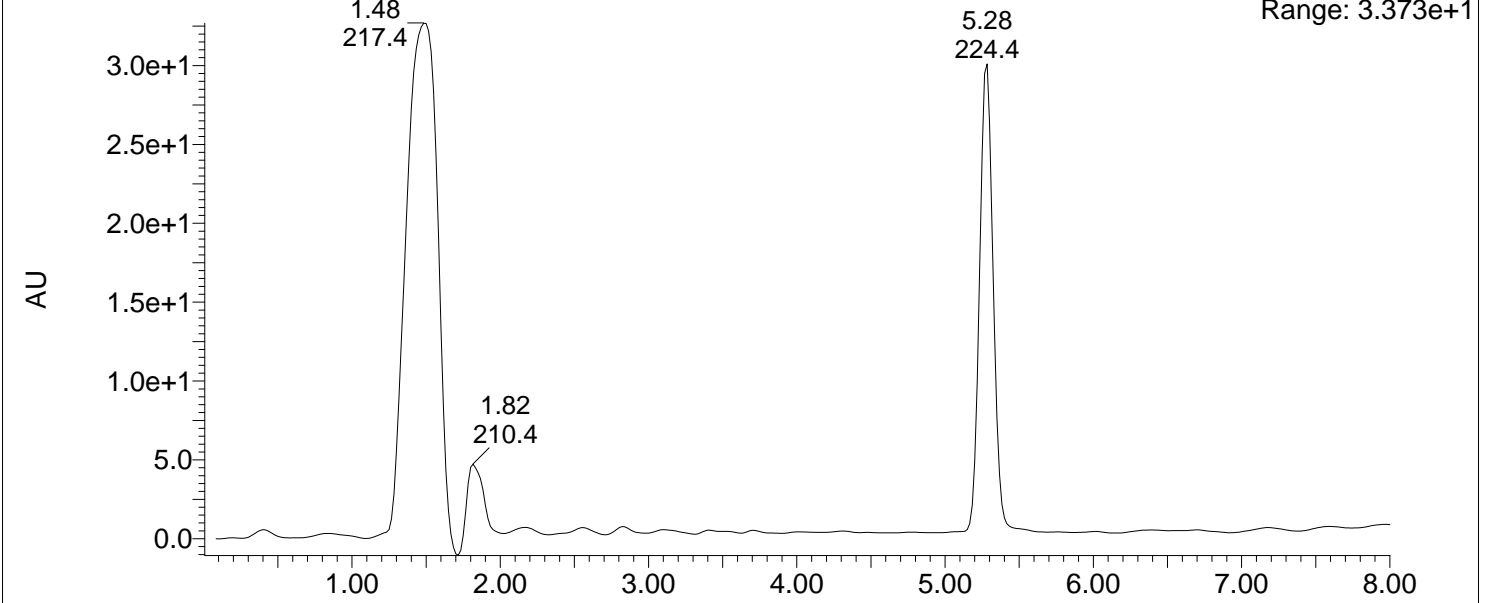

PKS3054

1: Scan ES+  
TIC  
1.93e7

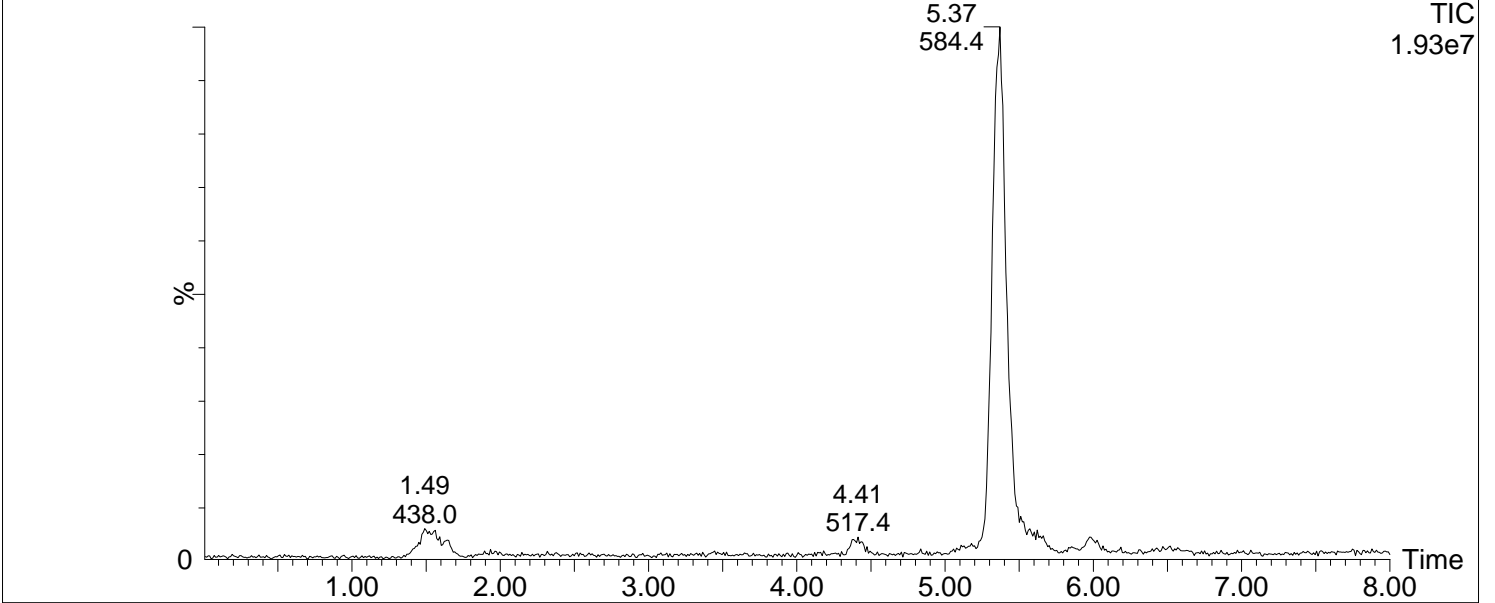

Supplement: NIHMS929271-supplement-SI.pdf [file NIHMS929271-supplement-SI.pdf]
